# Supplementary material for: Do we treat our patients or rather periodontal microbes with adjunctive antibiotics in periodontal therapy? A 16S rDNA microbial community analysis
Source: PLoS One. 2018 Apr 18;13(4):e0195534. doi: 10.1371/journal.pone.0195534 (PMC5906003; doi:10.1371/journal.pone.0195534)
Supplement: S1 Table — (XLSX) [file pone.0195534.s001.xlsx]

## Sheet: Tabelle1
aRSV-ID	Phylum	Class	Order	Family	Genus	002-V02	002-V04	003-V02	003-V04	006-V02	006-V04	010-V02	010-V04	017-V02	017-V04	020-V02	020-V04	021-V02	021-V04	026-V02	026-V04	037-V02	037-V04	043-V02	043-V04	044-V02	044-V04	045-V02	045-V04	050-V02	050-V04	054-V02	054-V04	056-V02	056-V04	058-V02	058-V04	064-V02	064-V04	076-V02	076-V04	077-V02	077-V04	086-V02	086-V04	089-V02	089-V04	091-V02	091-V04
aRSV1	Bacteroidetes	Bacteroidia	Bacteroidales	Porphyromonadaceae	Porphyromonas	0	0	2420	4117	0	0	36261	0	0	0	4878	0	849	0	2641	3066	4516	1057	11831	11802	295	0	5462	15	232	591	28871	4420	3804	0	0	0	2994	10118	0	0	1344	0	2845	1544	1198	0	3287	475
aRSV2	Fusobacteria	Fusobacteriia	Fusobacteriales	Fusobacteriaceae	Fusobacterium	4382	1618	1466	3793	3188	7056	19149	10167	1838	6061	9561	105	9882	3553	5624	9346	9757	5952	13147	27463	13338	15002	1271	4086	7471	8207	13536	13247	2295	2534	2439	2171	5979	14412	21495	13147	2082	3622	1206	4542	18249	15129	3035	3755
aRSV3	Bacteroidetes	Bacteroidia	Bacteroidales	Porphyromonadaceae	Tannerella	0	0	1029	940	672	0	26939	0	1210	143	2322	0	2750	0	1881	928	5782	183	12994	7813	5054	0	1134	184	1810	884	4644	3226	1968	0	727	2958	981	2135	2816	2707	405	0	0	0	4217	0	1402	895
aRSV4	Firmicutes	Bacilli	Lactobacillales	Streptococcaceae	Streptococcus	372	928	244	33	9003	9570	1970	17990	516	1275	19	527	1900	14559	424	599	2321	8000	559	784	2548	1827	454	512	196	338	581	754	224	308	422	78	2117	1535	2246	1228	304	1836	560	1504	2877	10436	158	1985
aRSV5	Bacteroidetes	Bacteroidia	Bacteroidales	Prevotellaceae	Prevotella	160	345	0	354	0	0	9	1619	17	589	131	0	480	1898	39	0	728	2470	1571	5435	1364	2293	49	1057	33	9	29	942	29	168	0	0	1068	2179	22	25	1465	1772	0	0	2861	6334	69	284
aRSV6	Firmicutes	Negativicutes	Selenomonadales	Veillonellaceae	Veillonella	388	2278	262	99	2992	5902	516	13597	60	975	32	931	5264	18752	41	1620	5609	1898	45	182	5282	7975	222	240	258	244	210	1426	0	61	534	0	1751	841	1900	5150	306	2989	460	922	2276	4852	174	670
aRSV7	Firmicutes	Clostridia	Clostridiales	Peptostreptococcaceae	Filifactor	0	0	1112	896	405	0	4587	0	831	57	1552	0	2127	14	546	369	887	535	0	0	341	0	866	251	1702	1072	5393	2535	1089	336	526	376	1036	2312	0	0	0	0	0	0	3697	33	850	236
aRSV8	Proteobacteria	Epsilonproteobacteria	Campylobacterales	Campylobacteraceae	Campylobacter	67	39	457	348	366	0	2573	974	721	450	959	0	2168	136	624	786	1398	577	3576	1939	632	28	481	192	417	536	1781	1250	200	48	163	489	350	1488	1388	1957	61	56	229	203	299	886	208	439
aRSV9	Spirochaetae	Spirochaetes	Spirochaetales	Spirochaetaceae	Treponema_2	432	0	53	378	3	0	5259	0	189	148	365	0	1077	0	85	93	2084	389	2688	2111	208	0	439	660	452	338	3355	1823	532	0	403	789	467	991	2778	2801	270	0	325	148	3081	0	866	176
aRSV10	Bacteroidetes	Bacteroidia	Bacteroidales	Porphyromonadaceae	NA	41	0	0	26	1223	0	1527	0	151	1124	47	0	532	7	409	0	0	0	363	501	869	3859	78	65	434	10	1272	1358	14	100	51	98	783	1495	8164	5866	119	0	0	0	15242	14	267	627
aRSV11	Synergistetes	Synergistia	Synergistales	Synergistaceae	Fretibacterium	57	0	280	207	383	0	4660	0	128	22	283	0	1926	274	450	332	2521	130	2490	1268	106	0	162	61	756	665	1431	2725	422	0	261	265	499	1115	329	703	190	0	74	0	1750	0	330	283
aRSV12	Firmicutes	Clostridia	Clostridiales	Family_XI	Parvimonas	46	139	0	112	21	0	2357	27	156	25	485	0	3642	1181	200	136	1692	263	3202	2163	3089	860	17	104	93	173	964	919	424	150	30	389	469	172	1900	1331	97	67	83	786	1017	554	151	154
aRSV13	Fusobacteria	Fusobacteriia	Fusobacteriales	Leptotrichiaceae	Oceanivirga	0	0	0	0	0	0	0	0	0	0	0	0	954	0	0	0	0	0	0	0	0	0	1479	0	0	0	0	0	0	0	0	0	0	0	0	0	0	0	0	0	937	0	0	0
aRSV14	Synergistetes	Synergistia	Synergistales	Synergistaceae	Fretibacterium	0	0	786	847	3343	0	12409	0	464	0	704	0	3883	65	923	687	4644	125	9060	6779	894	0	752	0	1403	840	5474	3066	519	0	427	431	1725	2025	3859	5292	429	0	215	0	2563	0	831	281
aRSV15	Proteobacteria	Betaproteobacteria	Neisseriales	Neisseriaceae	Neisseria	0	1568	143	0	574	3352	0	52	0	0	0	270	492	165	1067	1946	1321	13502	0	0	869	78	1372	113	0	83	33	124	25	198	1020	146	1191	1408	76	40	23	16	24	64	574	2636	19	717
aRSV16	Firmicutes	Clostridia	Clostridiales	Peptostreptococcaceae	Peptostreptococcus	0	0	0	131	0	0	213	41	0	0	0	0	892	1034	34	0	1613	521	3132	3995	1119	502	14	61	14	29	10	983	16	119	44	20	880	716	0	0	76	300	0	0	306	1388	100	6
aRSV17	Bacteroidetes	Bacteroidia	Bacteroidales	Porphyromonadaceae	Porphyromonas	0	0	927	1331	0	0	3391	0	476	122	2268	0	2900	380	754	861	4566	3797	4397	4474	1317	0	78	272	1494	1337	1159	4603	321	513	209	16	1054	1990	0	0	725	53	0	0	0	0	316	535
aRSV18	Actinobacteria	Actinobacteria	Micrococcales	Micrococcaceae	Rothia	74	0	0	0	539	7392	306	902	28	44	1005	13982	429	887	26	387	568	5074	807	872	142	1337	218	214	311	62	53	103	37	248	36	0	124	368	384	3255	54	184	344	512	448	480	12	498
aRSV19	Proteobacteria	Gammaproteobacteria	Pasteurellales	Pasteurellaceae	Haemophilus	918	532	75	0	567	1646	105	8711	80	246	74	4111	72	156	0	318	1474	733	0	0	105	20	218	0	117	435	125	730	0	71	66	0	28	269	62	87	132	955	0	559	249	997	82	221
aRSV20	Firmicutes	Clostridia	Clostridiales	Family_XIII	NA	43	43	37	77	34	0	1372	0	112	66	325	0	2702	0	231	270	602	0	0	0	2154	0	114	123	295	151	483	515	96	0	6	245	403	182	1931	550	16	0	97	273	1198	183	16	117
aRSV21	Firmicutes	Clostridia	Clostridiales	Family_XIII	NA	0	0	109	147	0	0	3582	0	263	25	132	0	931	12	376	199	815	21	1676	1828	681	0	78	60	269	234	2081	1173	224	0	40	211	456	361	620	595	23	0	0	0	1169	4	173	142
aRSV22	Firmicutes	Negativicutes	Selenomonadales	Veillonellaceae	Dialister	0	0	0	66	0	5209	186	43	0	35	209	0	171	657	89	79	376	558	1492	858	623	681	0	56	284	322	22	669	12	293	41	0	76	412	549	610	195	136	117	290	127	24	25	0
aRSV23	Spirochaetae	Spirochaetes	Spirochaetales	Spirochaetaceae	Treponema_2	0	0	809	495	0	0	8202	0	990	0	222	0	20	0	597	178	0	0	0	0	3069	0	562	0	0	139	2162	1132	246	0	0	0	881	1797	0	0	0	0	6	0	100	0	294	21
aRSV24	Bacteroidetes	Bacteroidia	Bacteroidales	Prevotellaceae	Prevotella	0	0	0	123	0	0	0	0	387	0	0	0	1367	28	1457	1147	2014	225	0	0	1346	0	95	136	3126	2314	2229	4980	90	0	309	91	1993	4010	8995	5481	0	0	0	0	0	0	268	0
aRSV25	Firmicutes	Negativicutes	Selenomonadales	Veillonellaceae	Anaeroglobus	226	0	0	20	0	16013	1634	0	74	0	79	0	16	80	34	0	539	826	666	118	280	3641	0	0	125	120	547	1788	16	184	81	0	61	79	678	266	9	14	0	0	83	0	0	0
aRSV26	Proteobacteria	Betaproteobacteria	Burkholderiales	Burkholderiaceae	Lautropia	69	1314	4	0	2	27	59	3392	15	18	478	2059	401	340	33	170	0	246	0	0	223	188	59	43	0	0	70	1324	13	46	7	0	66	418	57	92	9	27	11	14	96	1198	0	0
aRSV27	Firmicutes	Negativicutes	Selenomonadales	Veillonellaceae	Dialister	39	0	0	151	0	1380	165	0	856	0	128	0	191	97	91	426	150	77	0	0	135	470	4	229	175	287	0	255	0	234	9	0	244	230	272	657	500	0	30	0	15	128	0	0
aRSV28	Bacteroidetes	Bacteroidia	Bacteroidales	Prevotellaceae	Alloprevotella	323	56	0	365	0	18568	4	71	38	187	1477	0	1173	384	79	0	0	118	172	1465	884	5083	62	1470	786	431	82	3346	0	2679	71	102	385	22	47	2082	237	31	0	0	1103	521	91	91
aRSV29	Proteobacteria	Deltaproteobacteria	Desulfobacterales	Desulfobulbaceae	Desulfobulbus	0	0	13	88	555	0	2627	0	0	0	176	0	1078	0	485	0	947	0	1516	779	980	0	142	0	311	26	1495	1357	171	0	103	175	243	358	697	508	32	0	74	26	1173	0	293	193
aRSV30	Saccharibacteria	NA	NA	NA	NA	0	0	0	0	0	0	7	0	50	32	0	0	275	1030	13	0	11	0	0	85	655	0	5	157	0	0	0	5945	0	0	65	0	250	73	0	0	38	0	984	276	240	0	0	0
aRSV31	Proteobacteria	Betaproteobacteria	Neisseriales	Neisseriaceae	Neisseria	46	18	26	0	23	58	0	28	87	736	0	15	0	14	0	67	54	14	0	0	54	8	5	104	0	0	0	12	0	0	1005	33	220	475	19	0	23	0	0	34	1404	4209	0	0
aRSV32	Firmicutes	Bacilli	Lactobacillales	Streptococcaceae	Streptococcus	137	533	43	41	10438	2528	921	0	23	251	100	0	1468	1694	0	124	1285	481	1381	1529	289	1590	16	0	67	296	116	98	0	52	28	116	845	234	1402	2111	0	94	22	822	97	73	28	395
aRSV33	Spirochaetae	Spirochaetes	Spirochaetales	Spirochaetaceae	Treponema_2	0	0	317	172	0	0	2424	0	278	159	0	0	875	0	611	275	513	126	0	0	0	0	29	218	0	0	316	211	90	0	71	272	83	105	858	884	64	0	423	37	689	0	196	351
aRSV34	Saccharibacteria	NA	NA	NA	NA	169	19	0	13	0	0	297	0	27	53	0	0	0	427	0	0	0	0	1282	333	0	0	0	29	0	0	29	5367	16	212	43	0	232	1125	108	0	43	0	121	30	163	0	45	0
aRSV35	Firmicutes	Clostridia	Clostridiales	Family_XIII	NA	0	0	34	38	110	0	3608	0	0	0	0	0	2368	0	203	10	2715	0	0	0	1511	0	0	0	0	0	0	0	0	0	0	0	733	229	0	0	0	0	0	0	379	0	89	57
aRSV36	Proteobacteria	Epsilonproteobacteria	Campylobacterales	Campylobacteraceae	Campylobacter	323	0	175	56	145	30	331	11	78	267	33	0	529	820	164	174	167	33	255	368	1172	600	97	353	114	648	238	1285	0	58	8	46	123	266	352	369	21	383	599	678	1578	159	37	107
aRSV37	Firmicutes	Bacilli	Lactobacillales	Carnobacteriaceae	Granulicatella	65	110	0	0	768	289	22	3647	24	100	0	46	258	3319	0	0	123	508	19	15	86	178	19	38	14	15	17	102	0	7	31	12	232	363	117	15	0	168	60	46	304	389	0	66
aRSV38	Saccharibacteria	NA	NA	NA	NA	0	0	0	0	30	0	0	0	24	32	253	0	232	242	42	620	89	0	0	9	878	0	0	168	358	771	0	0	0	0	73	0	0	70	74	0	28	0	39	16	123	251	0	0
aRSV39	Spirochaetae	Spirochaetes	Spirochaetales	Spirochaetaceae	Treponema_2	256	11	2984	1697	3	0	2177	25	1286	106	208	0	3800	0	635	889	3051	119	1634	1923	1383	0	377	663	429	1774	2217	3964	152	186	328	380	1363	2145	700	222	867	17	540	247	2399	79	558	250
aRSV40	Firmicutes	Clostridia	Clostridiales	Lachnospiraceae	Oribacterium	43	0	0	15	551	1592	9	0	13	35	31	0	193	186	0	26	83	53	79	153	303	2456	27	325	10	172	0	164	0	202	11	0	76	38	9	1141	0	57	485	1016	188	4	0	95
aRSV41	Firmicutes	Negativicutes	Selenomonadales	Veillonellaceae	Selenomonas	590	0	0	282	0	147	2158	383	190	284	267	0	2748	958	0	192	434	1417	847	2273	884	802	94	738	106	1132	63	2672	55	1379	95	53	1167	771	213	448	374	354	1041	609	558	222	55	19
aRSV42	Bacteroidetes	Bacteroidia	Bacteroidales	Prevotellaceae	Prevotella	219	162	0	149	1774	0	730	174	0	0	147	23	444	1531	0	172	1411	1351	1203	2632	3280	4170	0	199	49	158	249	494	26	411	30	0	457	252	1303	2502	164	94	0	0	236	377	0	155
aRSV43	Bacteroidetes	Sphingobacteriia	Sphingobacteriales	Lentimicrobiaceae	NA	21	0	70	523	0	0	929	0	42	8	303	0	1022	138	157	88	0	0	0	0	91	0	50	203	0	0	857	3962	12	384	0	0	25	0	0	0	0	0	0	0	0	0	121	0
aRSV44	Fusobacteria	Fusobacteriia	Fusobacteriales	Leptotrichiaceae	Leptotrichia	0	0	0	45	0	0	25	872	7	124	22	0	595	550	50	407	20	74	0	0	85	1209	460	30	85	709	13	12867	25	43	73	21	237	870	73	8	51	0	0	0	148	1902	0	0
aRSV45	Fusobacteria	Fusobacteriia	Fusobacteriales	Leptotrichiaceae	Leptotrichia	24	0	51	0	0	0	19	303	5	858	0	0	138	83	0	0	0	0	119	90	87	32	0	336	0	0	0	0	0	797	0	0	14	0	1140	0	35	0	36	26	344	45	0	0
aRSV46	Synergistetes	Synergistia	Synergistales	Synergistaceae	Pyramidobacter	0	0	0	0	0	0	0	0	0	0	0	0	514	7	17	0	0	0	0	0	0	0	0	0	0	0	0	0	8	0	0	0	0	0	0	0	0	0	0	0	0	0	0	0
aRSV47	Bacteroidetes	Bacteroidia	Bacteroidales	Prevotellaceae	Prevotella	0	0	0	185	0	0	55	0	0	0	88	0	104	44	0	0	37	253	34	253	48	310	0	0	62	81	0	7	0	0	24	0	28	26	0	0	39	27	1279	2040	178	0	0	20
aRSV48	Bacteroidetes	Flavobacteriia	Flavobacteriales	Flavobacteriaceae	Capnocytophaga	912	603	216	66	0	660	12	555	35	231	0	0	737	278	142	866	119	1370	155	161	1526	249	169	415	22	440	21	806	9	401	138	45	183	630	58	0	0	0	290	340	183	974	34	163
aRSV49	Spirochaetae	Spirochaetes	Spirochaetales	Spirochaetaceae	Treponema_2	183	0	128	205	114	0	1420	12	158	52	281	0	541	371	140	79	630	104	1712	1620	1110	76	115	170	167	376	1165	1978	175	246	77	151	249	706	397	713	73	31	326	253	474	227	92	49
aRSV50	Bacteroidetes	Bacteroidia	Bacteroidales	Prevotellaceae	Prevotella_7	0	0	58	180	19	0	0	0	62	60	0	0	1968	38	0	0	0	0	0	0	0	0	81	580	885	936	521	130	0	0	0	0	513	125	1310	1485	0	0	0	0	7373	16	0	0
aRSV51	Fusobacteria	Fusobacteriia	Fusobacteriales	Leptotrichiaceae	Leptotrichia	0	0	38	0	0	0	19	1069	50	52	0	0	0	0	0	0	0	0	59	0	967	68	0	569	0	44	0	0	0	0	0	0	0	54	0	0	0	73	231	300	571	904	48	0
aRSV52	Firmicutes	Bacilli	Bacillales	Family_XI	Gemella	39	64	24	0	241	694	476	891	58	308	0	40	435	999	81	30	387	182	36	160	34	39	25	140	0	0	110	269	62	26	105	24	799	1042	478	47	62	78	61	533	1250	2671	45	66
aRSV53	Bacteroidetes	Bacteroidia	Bacteroidales	Bacteroidales_Incertae_Sedis	Phocaeicola	0	0	56	94	0	0	0	0	74	0	0	0	430	55	28	0	862	8	1458	114	1487	0	88	0	183	0	337	538	10	18	45	18	52	115	0	0	120	0	176	35	0	0	0	0
aRSV54	Firmicutes	Clostridia	Clostridiales	Lachnospiraceae	Catonella	173	61	0	90	0	133	322	1302	8	124	0	0	57	22	50	73	39	59	1332	1226	0	4	18	116	58	60	109	754	190	158	76	27	618	326	93	127	72	65	253	761	0	263	42	77
aRSV55	Firmicutes	Clostridia	Clostridiales	Defluviitaleaceae	Defluviitaleaceae_UCG-011	0	0	119	335	70	0	704	0	72	8	0	0	537	0	267	182	203	3	1543	1150	164	0	166	0	252	265	676	198	46	0	47	66	146	392	0	0	0	0	0	0	76	0	248	95
aRSV56	Bacteroidetes	Bacteroidia	Bacteroidales	Porphyromonadaceae	Porphyromonas	17	17	0	6	0	38	0	834	0	0	0	0	0	22	0	0	0	0	0	0	250	4	0	119	0	0	0	0	0	0	218	0	11	451	4	0	104	0	17	17	136	1667	0	0
aRSV57	Bacteroidetes	Bacteroidia	Bacteroidales	Porphyromonadaceae	Tannerella	104	43	0	90	0	0	38	1212	0	144	22	0	111	1292	13	20	29	0	63	55	403	821	83	652	11	0	0	716	0	215	0	0	142	541	116	710	0	48	231	91	13	225	27	0
aRSV58	Proteobacteria	Betaproteobacteria	Neisseriales	Neisseriaceae	Kingella	0	0	0	0	39	37	134	482	23	76	15	36	158	477	0	1023	33	600	0	0	99	309	13	0	0	60	7	73	0	0	0	0	152	160	48	54	20	204	19	202	0	52	17	718
aRSV59	Fusobacteria	Fusobacteriia	Fusobacteriales	Leptotrichiaceae	Leptotrichia	0	0	0	0	0	0	0	0	0	174	0	0	0	0	0	0	0	0	12	71	11	242	0	381	17	0	0	842	0	0	29	0	38	138	0	0	25	0	602	0	128	0	17	0
aRSV60	Bacteroidetes	Flavobacteriia	Flavobacteriales	Flavobacteriaceae	Capnocytophaga	0	0	0	0	0	56	137	2476	167	1071	0	0	1058	2677	109	858	71	360	11	170	678	105	49	178	45	71	9	244	4	1158	55	76	293	1075	2110	34	39	144	324	510	338	3839	0	209
aRSV61	Saccharibacteria	NA	NA	NA	NA	0	0	0	24	0	0	440	0	0	35	0	0	532	0	0	0	0	0	282	696	0	0	0	0	34	20	0	859	0	0	22	0	84	311	42	27	22	0	695	69	167	0	0	0
aRSV62	Tenericutes	Mollicutes	Mycoplasmatales	Mycoplasmataceae	Mycoplasma	0	0	125	98	0	0	0	0	401	0	0	0	199	0	0	0	0	0	360	587	242	0	207	0	45	72	538	240	128	0	130	209	258	399	0	0	22	0	0	0	0	0	81	0
aRSV63	Firmicutes	Clostridia	Clostridiales	Family_XI	NA	0	0	13	33	0	0	0	0	0	0	0	0	0	0	0	0	0	0	0	0	0	0	0	0	0	0	0	0	1045	0	169	760	422	904	0	0	0	0	0	0	0	0	440	62
aRSV64	Firmicutes	Clostridia	Clostridiales	Ruminococcaceae	Ruminococcaceae_UCG-014	15	0	0	0	0	0	0	186	28	265	0	0	41	0	4	0	0	0	0	0	79	0	31	104	4	0	0	316	8	0	16	0	70	327	14	0	0	0	0	0	128	966	0	0
aRSV65	Fusobacteria	Fusobacteriia	Fusobacteriales	Leptotrichiaceae	Leptotrichia	316	197	0	0	0	0	0	0	457	885	0	0	16	0	52	20	0	0	83	69	142	0	0	172	0	0	130	89	38	0	74	0	594	889	404	0	25	0	410	101	91	383	0	0
aRSV66	Spirochaetae	Spirochaetes	Spirochaetales	Spirochaetaceae	Treponema_2	33	6	198	167	0	0	2701	0	79	36	388	0	424	53	92	96	542	78	1353	1263	881	0	141	33	356	267	1416	748	316	215	105	232	181	371	183	225	0	0	113	102	518	51	141	52
aRSV67	Bacteroidetes	Flavobacteriia	Flavobacteriales	Flavobacteriaceae	Capnocytophaga	0	0	0	0	0	0	84	3045	62	461	0	0	129	2388	0	0	59	0	0	0	0	0	12	115	0	0	0	206	21	0	0	0	52	92	153	26	22	490	0	0	156	0	0	0
aRSV68	Bacteroidetes	Bacteroidia	Bacteroidales	Prevotellaceae	NA	0	0	459	540	0	0	0	0	0	0	0	0	1017	0	0	0	3444	0	0	0	1255	0	56	0	0	0	98	573	213	0	0	0	41	0	0	0	0	0	0	0	0	0	136	0
aRSV69	Firmicutes	Negativicutes	Selenomonadales	Veillonellaceae	NA	0	0	0	76	0	0	382	363	310	419	0	0	799	240	0	100	91	169	0	168	36	53	89	783	10	134	0	1552	0	329	0	0	920	242	29	234	154	426	91	65	723	3302	111	22
aRSV70	Proteobacteria	Betaproteobacteria	Neisseriales	Neisseriaceae	Neisseria	137	91	7	0	701	6932	0	0	28	37	112	0	0	0	29	0	341	654	0	0	0	45	0	25	47	12	0	0	0	293	0	5	103	54	119	11	0	0	0	0	54	1466	0	0
aRSV71	Firmicutes	Clostridia	Clostridiales	Eubacteriaceae	Pseudoramibacter	0	0	0	0	8	0	882	0	13	0	0	0	109	10	0	0	786	20	138	9	77	149	0	0	0	0	85	27	9	0	0	8	15	0	59	100	0	0	289	16	49	0	4	0
aRSV72	Bacteroidetes	Flavobacteriia	Flavobacteriales	Flavobacteriaceae	Capnocytophaga	26	25	0	0	0	97	189	2652	29	167	0	0	73	2636	149	110	0	88	0	0	95	0	19	86	0	0	24	633	9	0	79	24	61	519	74	0	31	485	105	945	288	1291	18	128
aRSV73	Bacteroidetes	Bacteroidia	Bacteroidales	Prevotellaceae	Prevotella_7	0	0	0	0	0	12471	0	47	0	0	48	0	99	5388	0	0	124	106	76	47	2012	251	0	139	41	260	0	0	0	174	156	0	123	53	60	0	0	78	0	0	0	0	0	0
aRSV74	Bacteroidetes	Bacteroidia	Bacteroidales	Porphyromonadaceae	Odoribacter	0	0	366	33	0	0	0	0	0	0	0	0	612	0	391	63	0	0	0	0	0	0	0	0	0	0	0	0	0	0	0	0	0	0	0	0	0	0	0	0	700	0	225	54
aRSV75	Proteobacteria	Gammaproteobacteria	Pasteurellales	Pasteurellaceae	Aggregatibacter	0	0	0	0	0	0	0	0	88	220	0	0	86	0	0	0	0	0	0	0	223	0	0	0	25	0	126	0	0	0	0	0	0	0	103	0	96	0	0	0	972	1264	0	0
aRSV76	Proteobacteria	Gammaproteobacteria	Pasteurellales	Pasteurellaceae	NA	103	173	13	491	1407	64	0	512	32	13	34	442	382	190	373	846	538	27	0	0	106	0	17	69	0	40	1323	161	44	0	490	35	1044	2566	692	73	0	24	22	0	690	1252	0	367
aRSV77	Proteobacteria	Betaproteobacteria	Neisseriales	Neisseriaceae	NA	0	0	26	0	0	0	0	0	13	163	0	0	60	7	0	736	0	0	0	0	55	0	28	0	0	90	0	0	7	120	114	14	172	272	56	0	0	0	0	0	90	363	0	0
aRSV78	Firmicutes	Erysipelotrichia	Erysipelotrichales	Erysipelotrichaceae	Solobacterium	17	0	0	0	0	7	8	26	0	18	0	0	112	283	16	0	14	81	4	36	440	423	0	36	4	6	0	140	0	106	0	0	46	65	39	119	45	235	0	84	16	48	16	6
aRSV79	Actinobacteria	Actinobacteria	Actinomycetales	Actinomycetaceae	Actinomyces	0	0	0	0	51	17	580	507	0	44	0	0	919	1516	0	0	38	0	0	140	541	1297	83	41	0	19	0	15	0	0	0	0	176	115	253	215	0	0	0	0	174	1464	3	24
aRSV80	Saccharibacteria	NA	NA	NA	NA	0	169	0	36	0	19	50	104	33	3261	7	0	320	4353	0	0	0	0	6	0	2098	0	412	1160	0	0	24	184	11	0	21	9	151	593	0	0	48	0	239	0	188	2150	0	0
aRSV81	Chloroflexi	Anaerolineae	Anaerolineales	Anaerolineaceae	NA	0	0	6	0	41	0	711	0	0	0	0	0	220	0	16	0	71	0	688	127	312	0	30	0	0	0	0	0	128	0	15	41	21	57	217	126	13	0	18	0	187	0	66	4
aRSV82	Bacteroidetes	Bacteroidia	Bacteroidales	Prevotellaceae	Prevotella_7	0	0	12	22	0	0	536	0	39	0	89	0	81	7	0	64	187	0	774	494	81	0	31	0	49	139	0	42	65	0	21	8	81	272	0	0	16	0	0	0	0	0	0	0
aRSV83	Firmicutes	Clostridia	Clostridiales	Lachnospiraceae	Lachnoanaerobaculum	33	0	15	0	24	392	64	250	0	472	0	0	37	449	7	0	0	127	39	23	80	10	29	268	0	11	11	137	0	41	24	0	193	291	121	26	0	220	63	144	205	930	11	14
aRSV84	Firmicutes	Clostridia	Clostridiales	Family_XI	Parvimonas	0	0	122	142	0	0	0	0	0	0	0	0	0	0	0	0	0	0	0	0	810	0	0	0	0	0	0	0	336	0	24	58	0	0	47	124	0	0	0	0	90	0	0	0
aRSV85	Bacteroidetes	Bacteroidia	Bacteroidales	Prevotellaceae	Prevotella_7	0	0	16	62	0	0	0	78	0	0	289	0	112	780	0	0	10	0	0	0	181	318	0	22	28	165	8	776	0	74	0	0	751	2099	0	0	131	0	1173	1273	0	15	0	0
aRSV86	Fusobacteria	Fusobacteriia	Fusobacteriales	Leptotrichiaceae	Leptotrichia	0	0	0	0	0	304	33	681	27	320	0	0	13	91	25	2085	0	124	0	0	49	189	0	80	15	11	9	213	0	103	103	0	359	768	48	0	75	250	67	316	134	3909	0	43
aRSV87	Firmicutes	Clostridia	Clostridiales	Peptococcaceae	Peptococcus	145	0	0	82	0	0	383	0	92	115	0	0	637	364	97	36	54	0	49	30	0	0	62	195	37	183	313	338	7	55	0	0	400	319	469	122	25	0	0	247	113	0	40	66
aRSV88	Bacteroidetes	Bacteroidia	Bacteroidales	Porphyromonadaceae	Porphyromonas	0	0	0	0	0	0	19	0	100	741	0	0	259	0	249	67	0	0	0	81	0	0	25	105	0	0	0	43	125	42	247	40	1723	3484	0	0	0	0	107	883	1530	1385	0	0
aRSV89	Proteobacteria	Betaproteobacteria	Neisseriales	Neisseriaceae	Neisseria	0	0	0	0	167	21	14	4155	33	21	0	0	0	29	0	0	0	0	0	0	54	51	0	0	0	0	0	565	0	0	0	0	0	0	199	0	0	0	19	184	0	0	0	0
aRSV90	Firmicutes	Negativicutes	Selenomonadales	Veillonellaceae	Selenomonas_3	0	0	0	0	0	0	0	73	0	404	0	0	27	1225	0	0	0	0	0	0	0	307	8	0	0	0	0	0	0	0	0	0	0	0	12	0	12	0	0	927	0	324	27	65
aRSV91	Firmicutes	Clostridia	Clostridiales	Family_XIII	NA	0	0	16	0	0	0	1346	0	0	0	44	0	218	0	38	4	183	16	101	14	290	0	10	0	99	39	1612	477	98	0	39	284	89	78	511	290	0	0	35	26	501	0	27	4
aRSV92	Firmicutes	Clostridia	Clostridiales	Peptostreptococcaceae	NA	36	282	0	0	0	0	219	1980	0	248	0	0	203	11	220	40	5	59	719	82	0	0	0	74	62	50	92	463	12	10	0	0	254	575	0	0	0	0	0	0	0	0	67	42
aRSV93	Bacteroidetes	Bacteroidia	Bacteroidales	Prevotellaceae	Prevotella_2	94	0	0	0	0	0	364	0	65	229	59	0	668	1351	110	0	106	52	61	261	353	3402	94	187	45	72	0	274	21	69	39	0	443	563	363	0	78	0	0	0	316	28	26	21
aRSV94	Firmicutes	Negativicutes	Selenomonadales	Veillonellaceae	NA	118	203	0	93	0	178	102	1809	13	35	147	0	40	451	0	23	60	140	0	15	0	324	14	236	32	163	0	2163	41	0	14	0	304	729	0	162	0	205	237	745	172	872	0	0
aRSV95	Firmicutes	Bacilli	Lactobacillales	Streptococcaceae	Streptococcus	0	7	0	0	88	498	0	105	0	0	0	0	0	12	0	0	372	1846	568	115	150	39	0	0	0	0	0	0	0	0	0	0	0	0	56	0	0	0	0	0	0	73	0	0
aRSV96	Proteobacteria	Deltaproteobacteria	Desulfovibrionales	Desulfovibrionaceae	Desulfovibrio	0	0	0	0	0	0	0	0	0	0	0	0	0	0	0	0	0	0	0	0	1017	0	188	0	0	0	0	0	131	0	46	41	0	50	0	0	0	0	0	0	0	0	39	0
aRSV97	Firmicutes	Bacilli	Lactobacillales	Aerococcaceae	Abiotrophia	0	610	0	0	0	514	0	0	0	0	0	49	139	11	0	12	13	2160	0	0	21	16	0	0	0	0	0	43	0	0	16	0	77	15	0	0	0	0	0	0	109	893	0	0
aRSV98	Bacteroidetes	Flavobacteriia	Flavobacteriales	Flavobacteriaceae	Bergeyella	16	43	14	0	10	0	0	412	19	67	22	38	35	202	83	120	10	38	0	0	63	11	0	5	0	4	0	76	0	13	84	42	93	164	5	0	18	32	0	77	31	166	10	111
aRSV99	Bacteroidetes	Bacteroidia	Bacteroidales	Rikenellaceae	Rikenellaceae_RC9_gut_group	0	0	48	90	0	0	0	0	91	0	63	0	168	0	0	0	306	21	386	256	413	0	44	0	29	319	448	185	0	0	14	17	103	175	0	0	18	0	0	0	0	0	66	4
aRSV100	Firmicutes	Negativicutes	Selenomonadales	Veillonellaceae	Selenomonas_3	539	0	82	26	165	0	0	0	2	982	0	0	0	172	142	17	44	55	10	160	167	371	9	213	0	28	66	33	0	3	0	0	339	299	374	0	0	114	386	0	592	0	0	0
aRSV101	Bacteroidetes	Bacteroidia	Bacteroidales	Prevotellaceae	Prevotella_7	0	0	0	28	75	438	15	1041	0	12	0	0	6	39	28	0	261	0	0	0	669	6	68	101	0	12	13	850	0	106	0	0	402	630	0	13	149	2988	879	1299	10	2292	0	0
aRSV102	Firmicutes	Clostridia	Clostridiales	Peptostreptococcaceae	NA	0	0	0	52	0	0	237	0	14	0	0	0	317	0	23	26	0	0	277	1505	0	0	0	0	0	13	0	129	0	287	0	0	108	102	0	0	0	0	0	0	2	257	0	0
aRSV103	Proteobacteria	Betaproteobacteria	Neisseriales	Neisseriaceae	NA	92	21	0	13	92	63	37	375	11	177	0	492	375	393	119	151	107	101	693	103	252	136	13	58	9	11	257	370	26	203	0	23	177	1163	469	298	35	99	116	423	313	1420	42	252
aRSV104	Firmicutes	Negativicutes	Selenomonadales	Veillonellaceae	Selenomonas_3	0	0	0	0	99	0	0	0	0	0	0	0	13	296	0	0	85	363	9	44	37	128	0	122	0	0	0	0	0	0	29	0	0	0	0	0	0	39	80	6	35	88	0	0
aRSV105	Firmicutes	Clostridia	Clostridiales	Lachnospiraceae	Butyrivibrio_2	0	0	18	26	0	0	681	0	0	0	0	0	0	0	0	0	0	0	47	21	0	0	19	21	143	22	12	569	0	0	30	0	0	0	0	0	875	0	0	0	0	0	54	0
aRSV106	Firmicutes	Clostridia	Clostridiales	Lachnospiraceae	Johnsonella	0	0	35	111	0	0	0	0	97	0	0	0	836	0	0	0	455	0	62	161	224	0	61	58	0	0	40	0	0	0	0	0	0	0	0	0	0	0	0	0	72	0	96	14
aRSV107	Fusobacteria	Fusobacteriia	Fusobacteriales	Leptotrichiaceae	Leptotrichia	128	0	0	19	0	0	0	0	26	0	0	0	51	0	0	0	14	0	63	0	0	0	75	213	0	10	0	34	0	0	0	0	52	0	0	595	0	0	0	0	61	41	18	0
aRSV108	Bacteroidetes	Bacteroidia	Bacteroidales	Prevotellaceae	Prevotella_7	0	0	0	41	0	0	4	50	0	0	12	0	68	15	0	0	224	122	93	626	68	0	0	0	11	27	0	170	0	145	8	0	0	0	0	0	38	0	0	0	0	0	0	0
aRSV109	Firmicutes	Negativicutes	Selenomonadales	Veillonellaceae	Selenomonas_4	146	0	0	21	0	0	400	0	0	16	0	0	97	6	0	129	16	9	524	152	116	1608	0	54	34	204	0	67	0	0	14	33	277	92	0	0	0	0	47	0	161	0	0	0
aRSV110	Firmicutes	Clostridia	Clostridiales	Family_XIII	NA	0	0	0	42	0	0	0	25	0	0	0	0	29	27	0	0	35	39	17	33	68	261	0	0	27	59	0	51	0	162	0	0	134	102	37	0	22	12	134	35	23	9	0	0
aRSV111	Firmicutes	Negativicutes	Selenomonadales	Veillonellaceae	Selenomonas_4	0	0	0	0	32	0	0	0	12	0	188	0	220	318	28	30	103	17	181	151	86	0	0	14	145	45	0	646	0	0	0	0	77	253	134	550	23	41	343	76	65	0	0	0
aRSV112	Firmicutes	Negativicutes	Selenomonadales	Veillonellaceae	Selenomonas_3	37	0	0	0	0	0	20	185	0	0	0	0	4	0	0	434	0	523	0	0	0	0	0	0	0	0	0	60	0	0	0	0	10	717	24	0	11	0	0	0	188	18	31	122
aRSV113	Spirochaetae	Spirochaetes	Spirochaetales	Spirochaetaceae	Treponema_2	0	0	55	16	0	0	263	0	41	0	0	0	68	12	0	21	140	0	138	132	86	0	0	0	17	45	145	102	0	40	0	0	26	32	25	51	21	0	32	0	46	0	27	0
aRSV114	Actinobacteria	Coriobacteriia	Coriobacteriales	Coriobacteriaceae	Atopobium	0	0	0	0	0	2539	8	100	0	0	0	0	36	754	16	47	366	439	70	122	680	573	0	0	93	88	0	79	0	129	0	0	123	9	0	89	0	29	185	30	65	76	0	0
aRSV115	Firmicutes	Negativicutes	Selenomonadales	Veillonellaceae	Selenomonas_4	0	0	110	0	0	0	807	0	167	0	0	0	366	0	109	225	158	0	171	31	797	13	23	0	15	28	225	107	24	0	31	43	76	115	0	0	0	0	0	0	0	0	38	0
aRSV116	Spirochaetae	Spirochaetes	Spirochaetales	Spirochaetaceae	Treponema_2	0	0	0	0	0	0	0	0	0	0	0	0	0	0	26	42	0	0	0	0	0	0	40	23	0	65	72	237	0	0	0	0	49	74	0	0	0	0	0	0	70	0	0	0
aRSV117	Bacteroidetes	Bacteroidia	Bacteroidales	Prevotellaceae	Prevotella_2	0	0	38	0	0	0	0	0	0	350	0	0	0	0	21	20	0	0	0	0	0	0	23	0	0	42	0	0	0	66	0	0	92	413	0	866	40	0	0	0	0	0	0	0
aRSV118	Actinobacteria	Actinobacteria	Corynebacteriales	Corynebacteriaceae	Corynebacterium	64	0	115	0	0	0	0	0	0	307	0	0	61	499	30	0	0	0	25	165	82	95	0	87	5	13	77	20	0	0	0	0	1301	835	801	18	0	0	160	66	232	1097	0	0
aRSV119	Proteobacteria	Betaproteobacteria	Neisseriales	Neisseriaceae	Eikenella	0	0	0	0	0	0	257	0	34	29	0	0	5	0	122	129	11	10	0	0	44	0	20	98	41	178	51	171	0	0	0	0	107	35	74	0	0	0	29	6	56	0	0	0
aRSV120	Proteobacteria	Epsilonproteobacteria	Campylobacterales	Campylobacteraceae	Campylobacter	75	0	0	0	0	64	15	102	0	492	0	0	40	472	0	21	11	0	0	51	96	107	17	220	11	0	0	4	29	26	0	0	108	993	131	0	20	49	10	79	295	45	0	25
aRSV121	Tenericutes	Mollicutes	Mycoplasmatales	Mycoplasmataceae	Mycoplasma	11	0	0	6	0	15	16	0	0	0	104	0	0	8	81	0	26	0	28	0	9	758	0	0	30	51	9	45	3	53	0	0	0	0	80	154	0	0	22	0	45	259	0	0
aRSV122	Firmicutes	Negativicutes	Selenomonadales	Veillonellaceae	Megasphaera	0	0	0	0	0	15	0	71	0	0	0	0	0	1161	0	0	34	61	0	0	0	9	0	14	0	0	0	0	0	92	30	0	7	0	0	0	14	221	0	17	12	15	0	0
aRSV123	Firmicutes	Clostridia	Clostridiales	Lachnospiraceae	Catonella	0	0	76	179	25	0	0	0	0	0	0	0	189	0	74	0	0	0	45	90	0	0	11	18	66	250	97	75	0	0	0	0	19	68	0	0	13	0	0	0	0	0	53	0
aRSV124	Saccharibacteria	NA	NA	NA	NA	0	0	0	0	0	0	0	0	13	22	0	0	28	0	0	0	0	0	0	0	33	0	0	0	0	0	0	0	0	0	0	0	64	20	0	0	0	0	0	0	33	0	0	0
aRSV125	Bacteroidetes	Bacteroidia	Bacteroidales	Prevotellaceae	Prevotella_6	0	0	0	0	0	0	0	42	0	0	0	0	15	937	0	0	0	39	0	0	32	0	0	34	0	0	0	0	0	0	0	0	0	0	0	42	0	146	59	50	111	276	0	0
aRSV126	Proteobacteria	Gammaproteobacteria	Cardiobacteriales	Cardiobacteriaceae	Cardiobacterium	0	0	0	0	30	0	36	0	25	123	15	0	53	25	23	35	15	0	0	24	726	168	0	17	0	31	32	300	0	75	11	0	80	257	63	37	0	0	17	66	34	384	0	0
aRSV127	Firmicutes	Clostridia	Clostridiales	Lachnospiraceae	Stomatobaculum	0	0	0	0	0	0	0	11	0	0	0	0	37	266	0	0	0	54	0	8	122	22	0	243	0	0	0	13	0	0	0	0	22	9	0	0	0	126	0	0	157	128	0	0
aRSV128	SR1_(Absconditabacteria)	NA	NA	NA	NA	0	0	0	0	0	0	0	0	0	100	0	0	50	0	18	8	0	0	0	0	0	0	0	22	39	89	0	92	0	33	36	0	35	162	0	0	10	9	0	0	37	180	44	23
aRSV129	Proteobacteria	Gammaproteobacteria	Pasteurellales	Pasteurellaceae	Aggregatibacter	0	0	0	0	0	0	248	2448	0	0	0	0	0	0	0	0	0	0	0	0	0	0	0	65	0	909	0	0	0	0	0	0	24	0	61	0	0	0	0	0	90	0	0	0
aRSV130	Bacteroidetes	Bacteroidia	Bacteroidales	Prevotellaceae	Prevotella_7	0	0	0	0	0	0	0	0	12	0	105	0	65	0	69	92	1749	20	260	168	0	0	0	0	0	0	284	202	48	0	95	0	75	200	0	13	201	0	0	0	40	0	0	0
aRSV131	Spirochaetae	Spirochaetes	Spirochaetales	Spirochaetaceae	Treponema_2	0	0	723	309	0	0	0	0	37	0	0	0	157	0	42	113	0	0	0	0	61	0	71	53	25	119	295	1741	0	0	0	0	207	288	0	0	0	0	0	0	0	0	0	0
aRSV132	Bacteroidetes	Flavobacteriia	Flavobacteriales	Flavobacteriaceae	Capnocytophaga	0	0	0	0	0	0	77	8	0	0	0	0	114	690	0	44	50	0	0	0	532	0	35	93	0	0	11	76	0	0	0	0	27	69	20	118	0	0	0	0	59	172	0	0
aRSV133	Bacteroidetes	Bacteroidia	Bacteroidales	Prevotellaceae	Alloprevotella	0	0	0	0	0	0	0	0	0	0	0	0	0	0	0	22	0	0	0	0	0	0	0	0	0	0	0	0	0	0	0	0	41	75	0	0	0	0	0	0	25	101	0	0
aRSV134	Actinobacteria	Actinobacteria	Actinomycetales	Actinomycetaceae	Actinomyces	0	148	0	0	316	142	85	318	0	18	0	0	154	616	0	0	330	430	104	82	44	0	0	0	0	0	79	45	0	0	0	0	76	6	74	463	0	89	10	25	86	135	6	23
aRSV135	Firmicutes	Negativicutes	Selenomonadales	Veillonellaceae	Selenomonas_3	0	0	0	0	0	0	67	304	0	0	0	0	22	0	0	509	0	0	0	0	0	87	0	0	0	0	0	57	0	0	0	0	6	800	25	358	0	0	0	0	81	10	0	0
aRSV136	Bacteroidetes	Bacteroidia	Bacteroidales	Prevotellaceae	Prevotella	40	0	0	0	0	0	33	0	0	220	0	0	0	0	4	0	0	0	0	0	0	0	16	29	72	5	0	0	0	0	0	0	35	576	0	0	0	0	0	0	24	0	0	0
aRSV137	Fusobacteria	Fusobacteriia	Fusobacteriales	Leptotrichiaceae	Leptotrichia	0	0	0	0	0	0	31	1072	0	0	0	0	8	0	0	0	0	0	0	0	0	574	24	17	0	0	16	910	0	0	0	0	18	67	0	0	0	0	0	0	0	0	22	236
aRSV138	Proteobacteria	Gammaproteobacteria	Cardiobacteriales	Cardiobacteriaceae	Cardiobacterium	0	0	0	0	0	0	0	0	0	0	0	0	0	504	27	0	0	0	0	0	61	0	0	0	0	0	0	59	11	84	0	0	19	73	0	0	0	0	36	232	69	0	0	0
aRSV139	Firmicutes	Clostridia	Clostridiales	Lachnospiraceae	Moryella	0	0	15	17	0	0	0	0	44	0	0	0	26	17	0	0	0	0	146	40	50	0	0	0	59	28	156	260	92	0	0	14	35	67	0	0	44	0	0	0	0	0	54	0
aRSV140	Firmicutes	Clostridia	Clostridiales	Clostridiales_vadinBB60_group	NA	0	0	48	67	0	0	226	0	72	0	0	0	58	0	41	43	19	0	144	153	81	0	35	0	0	0	49	149	74	116	18	12	83	29	0	0	76	0	0	0	0	0	43	0
aRSV141	Firmicutes	Bacilli	Lactobacillales	Streptococcaceae	Streptococcus	0	0	0	0	0	0	0	0	0	0	0	0	0	10	0	0	349	0	0	0	858	0	0	0	0	5	0	0	0	0	0	0	11	0	8	0	0	0	0	0	0	0	0	0
aRSV142	Firmicutes	Clostridia	Clostridiales	Family_XIII	Family_XIII_UCG-001	0	0	0	34	0	0	0	0	0	0	13	0	208	4	31	0	68	11	165	114	107	0	0	0	32	57	0	60	12	46	9	19	25	0	0	0	32	0	0	0	54	0	0	0
aRSV143	Bacteroidetes	Bacteroidia	Bacteroidales	Bacteroidaceae	Bacteroides	0	0	0	0	0	0	0	0	0	0	0	0	142	9	0	0	0	0	0	0	0	0	0	0	0	0	0	0	0	0	0	0	9	12	0	0	0	0	0	0	0	0	0	0
aRSV144	Actinobacteria	Coriobacteriia	Coriobacteriales	Coriobacteriaceae	Olsenella	0	0	0	0	0	18	0	0	0	7	0	0	22	558	0	0	0	0	65	141	44	0	0	14	0	0	0	612	0	0	0	0	65	21	41	0	0	0	0	0	107	0	0	0
aRSV145	Bacteroidetes	Bacteroidia	Bacteroidales	Prevotellaceae	Prevotella_7	0	0	0	0	0	0	0	0	153	0	177	0	55	0	0	0	0	0	0	0	500	0	0	0	0	0	0	0	0	0	0	0	66	208	0	0	0	0	0	0	0	0	34	8
aRSV146	Spirochaetae	Spirochaetes	Spirochaetales	Spirochaetaceae	Sphaerochaeta	0	0	18	0	0	0	0	0	0	0	0	0	29	0	0	0	0	0	0	0	54	0	0	0	0	0	0	0	0	0	0	0	0	0	0	0	0	0	0	0	6	0	0	0
aRSV147	Actinobacteria	Actinobacteria	Bifidobacteriales	Bifidobacteriaceae	Scardovia	0	0	0	0	0	97	0	18	0	0	0	0	0	74	0	0	39	21	0	0	65	0	0	0	0	0	0	0	0	0	0	0	0	0	0	0	0	8	0	0	0	0	0	0
aRSV148	Firmicutes	Erysipelotrichia	Erysipelotrichales	Erysipelotrichaceae	Bulleidia	0	0	0	0	0	0	11	0	0	0	19	0	3	28	9	44	46	0	0	0	58	0	0	0	32	53	10	49	0	0	0	5	5	0	631	40	0	0	0	0	94	0	0	0
aRSV149	Firmicutes	Clostridia	Clostridiales	Ruminococcaceae	Ruminococcaceae_UCG-014	0	0	0	0	0	0	0	0	0	57	0	0	10	80	0	0	0	0	0	0	28	0	0	0	0	0	0	126	0	8	0	0	9	97	0	0	0	115	0	0	18	184	0	0
aRSV150	Proteobacteria	Gammaproteobacteria	Pasteurellales	Pasteurellaceae	Haemophilus	0	0	14	0	0	36	0	69	0	53	0	1566	0	0	0	0	0	56	0	0	0	0	0	0	0	0	0	0	0	0	0	0	23	44	0	0	0	50	0	0	0	0	0	0
aRSV151	Tenericutes	Mollicutes	Acholeplasmatales	Acholeplasmataceae	Acholeplasma	0	0	0	0	0	0	0	0	0	0	0	0	0	0	0	0	0	0	0	0	0	0	0	0	0	0	0	0	0	0	0	0	287	405	0	0	0	0	0	0	0	0	0	0
aRSV152	Bacteroidetes	Bacteroidia	Bacteroidales	Prevotellaceae	Prevotella	29	87	0	0	0	0	0	19	0	24	0	0	0	37	0	0	64	377	0	4	0	0	0	177	0	0	0	0	0	0	16	0	0	23	0	0	0	157	205	104	318	889	0	25
aRSV153	Actinobacteria	Actinobacteria	Micrococcales	Micrococcaceae	Rothia	0	0	0	0	530	433	0	718	0	0	0	0	23	620	0	0	132	23	18	26	0	0	0	0	0	0	0	29	0	0	0	0	0	77	83	0	0	0	0	28	8	594	0	0
aRSV154	Bacteroidetes	Bacteroidia	Bacteroidales	Prevotellaceae	Prevotella	0	0	0	0	0	0	21	0	0	81	0	0	0	377	0	0	0	0	33	15	210	449	0	62	0	56	0	675	0	42	0	0	32	14	0	0	0	76	0	0	30	371	0	0
aRSV155	Bacteroidetes	Bacteroidia	Bacteroidales	Porphyromonadaceae	Porphyromonas	0	0	0	0	0	0	0	0	0	0	0	0	9	0	0	0	0	0	0	0	0	0	0	0	0	0	0	0	0	0	0	0	80	0	0	0	0	0	0	0	0	0	0	0
aRSV156	Firmicutes	Clostridia	Clostridiales	Family_XIII	Family_XIII_UCG-001	0	0	7	0	0	0	339	0	17	0	0	0	0	0	0	0	45	0	0	0	0	0	41	0	0	10	92	150	0	0	0	0	22	77	0	0	0	0	0	0	0	0	21	0
aRSV157	Tenericutes	Mollicutes	NB1-n	NA	NA	0	0	96	95	0	0	0	0	0	0	0	0	3	0	10	35	0	0	0	0	0	0	65	0	25	115	11	69	8	0	0	0	10	5	0	0	0	0	0	0	0	0	11	0
aRSV158	Spirochaetae	Spirochaetes	Spirochaetales	Spirochaetaceae	Treponema_2	0	0	0	0	0	0	0	0	0	0	0	0	0	0	11	34	0	0	0	0	150	0	0	0	0	5	0	0	0	0	0	0	350	40	0	0	0	0	0	0	0	0	0	0
aRSV159	Firmicutes	Clostridia	Clostridiales	Lachnospiraceae	Johnsonella	0	0	0	0	73	0	161	0	0	37	0	0	11	0	0	0	0	0	107	0	0	0	20	54	24	43	0	176	0	0	0	0	59	40	0	0	0	0	0	0	0	0	0	0
aRSV160	Spirochaetae	Spirochaetes	Spirochaetales	Spirochaetaceae	Treponema_2	6	0	115	155	0	0	922	11	0	0	0	0	196	0	0	0	0	0	0	0	19	0	0	0	0	0	0	0	0	0	0	0	0	48	0	0	0	0	0	0	83	0	0	0
aRSV161	Bacteroidetes	Bacteroidia	Bacteroidales	Rikenellaceae	Rikenellaceae_RC9_gut_group	0	0	0	0	0	0	0	0	0	0	5	0	0	0	0	0	313	153	0	0	157	0	0	0	148	72	133	1724	0	0	14	0	40	0	0	0	89	0	0	0	0	0	46	0
aRSV162	Firmicutes	Negativicutes	Selenomonadales	Veillonellaceae	Veillonella	0	0	0	0	113	0	0	48	0	0	0	0	0	192	0	0	0	0	0	0	196	0	0	157	0	0	0	0	0	0	0	0	0	0	0	0	0	0	0	0	0	84	0	0
aRSV163	Firmicutes	Negativicutes	Selenomonadales	Veillonellaceae	NA	0	0	0	0	0	0	0	0	0	0	0	0	0	0	0	0	0	0	0	0	0	0	0	139	0	0	0	0	0	0	0	0	26	0	0	0	0	0	0	0	0	0	0	0
aRSV164	Spirochaetae	Spirochaetes	Spirochaetales	Spirochaetaceae	Treponema_2	0	0	0	8	0	0	18	0	5	9	0	0	19	0	0	0	0	0	0	0	0	0	0	25	0	0	0	0	105	0	0	0	0	33	0	0	0	0	0	18	0	0	0	0
aRSV165	Firmicutes	Bacilli	Lactobacillales	Lactobacillaceae	Lactobacillus	0	0	0	0	0	0	0	0	0	0	0	0	0	1443	0	0	25	13	91	0	584	0	0	0	0	0	0	0	0	0	0	0	0	0	0	0	0	0	0	0	0	0	0	0
aRSV166	Bacteroidetes	Bacteroidia	Bacteroidales	Prevotellaceae	Prevotella_7	0	0	0	0	0	685	0	0	16	5	0	0	0	0	0	0	0	0	68	105	107	0	0	0	42	26	56	366	0	31	7	0	20	24	0	0	20	0	0	0	0	0	0	0
aRSV167	Firmicutes	Clostridia	Clostridiales	Lachnospiraceae	Johnsonella	0	7	0	0	0	0	111	2709	0	240	0	0	43	0	0	0	0	0	9	38	0	0	17	105	11	0	0	416	0	0	0	0	102	366	0	0	42	10	119	189	0	202	0	48
aRSV168	Bacteroidetes	Bacteroidia	Bacteroidales	Prevotellaceae	Prevotella	0	0	0	0	0	0	0	58	0	0	0	0	0	17	0	0	0	0	0	0	6	0	0	85	0	0	0	0	0	0	0	0	0	178	0	0	0	0	681	163	9	36	0	0
aRSV169	Bacteroidetes	Bacteroidia	Bacteroidales	p-2534-18B5_gut_group	NA	0	0	0	0	0	0	0	0	0	0	0	0	0	0	0	0	0	0	0	0	0	0	101	0	0	0	0	0	0	0	0	0	6	8	0	0	0	0	0	0	0	0	44	0
aRSV170	Saccharibacteria	Unknown_Class	Unknown_Order	Unknown_Family	Candidatus_Saccharimonas	0	0	0	0	0	0	0	0	0	0	0	0	0	0	0	0	0	0	0	0	0	0	0	0	0	0	0	161	0	6	13	0	0	0	4	0	0	0	0	0	0	0	0	0
aRSV171	Bacteroidetes	Bacteroidia	Bacteroidales	Prevotellaceae	Prevotella_2	0	0	0	26	0	0	0	0	0	0	0	0	46	0	0	0	0	0	0	0	0	0	0	33	0	0	0	922	0	0	0	0	6	0	0	0	0	0	0	0	41	1024	0	0
aRSV172	Bacteroidetes	Bacteroidia	Bacteroidales	Prevotellaceae	Prevotella_2	34	20	0	0	0	0	6	0	0	111	0	0	0	0	0	0	0	27	0	7	0	32	6	55	0	0	0	35	0	80	0	0	39	203	0	0	0	0	0	0	0	0	0	0
aRSV173	Saccharibacteria	NA	NA	NA	NA	0	0	0	0	0	0	0	0	58	158	0	0	0	0	0	0	0	22	0	0	0	287	0	0	0	0	0	0	0	0	0	0	0	0	0	0	0	0	99	953	0	523	0	0
aRSV174	Bacteroidetes	Bacteroidia	Bacteroidales	Bacteroidaceae	Bacteroides	0	0	0	0	0	0	0	0	0	0	0	0	0	0	0	0	0	0	0	0	464	0	0	0	0	0	11	18	0	0	0	0	0	0	0	0	77	0	0	0	0	0	0	0
aRSV175	Bacteroidetes	Flavobacteriia	Flavobacteriales	Flavobacteriaceae	Capnocytophaga	0	0	0	0	0	0	34	0	44	256	0	0	0	0	41	0	0	0	0	0	0	0	0	0	0	0	0	0	0	0	0	0	0	120	0	0	0	0	0	0	0	0	0	0
aRSV176	Proteobacteria	Gammaproteobacteria	Pasteurellales	Pasteurellaceae	Actinobacillus	0	0	0	0	0	0	0	0	0	0	0	0	0	0	80	0	0	0	0	0	0	0	0	0	0	0	0	0	0	0	0	0	0	0	0	0	0	0	0	41	0	0	0	0
aRSV177	Spirochaetae	Spirochaetes	Spirochaetales	Spirochaetaceae	Treponema_2	0	0	0	0	0	0	0	0	0	0	0	0	0	0	0	0	0	0	0	0	0	0	0	0	0	0	0	0	0	0	0	0	0	0	0	0	0	0	0	0	0	0	0	0
aRSV178	Firmicutes	Bacilli	Lactobacillales	Lactobacillaceae	Lactobacillus	0	0	0	0	0	0	0	0	0	0	0	0	0	2391	0	0	0	0	0	0	16	17	0	0	0	0	0	0	0	0	0	0	0	0	0	0	0	0	0	0	0	0	0	0
aRSV179	Firmicutes	Negativicutes	Selenomonadales	Veillonellaceae	Selenomonas	0	0	0	0	0	0	0	0	0	83	0	0	0	0	0	0	0	21	0	0	0	0	16	0	0	0	0	94	0	0	0	0	9	131	0	0	0	0	0	0	18	0	0	0
aRSV180	Actinobacteria	Actinobacteria	Propionibacteriales	Propionibacteriaceae	NA	0	0	34	0	0	383	5	53	0	0	57	0	34	32	0	0	0	0	0	0	0	53	0	0	0	0	28	13	0	0	0	0	55	44	0	7	0	0	8	0	34	62	0	0
aRSV181	Firmicutes	Clostridia	Clostridiales	Lachnospiraceae	Shuttleworthia	0	0	0	0	0	1836	0	51	0	0	0	0	0	0	0	0	0	36	0	0	247	143	0	0	0	0	0	0	0	76	0	0	0	0	0	0	0	0	0	0	0	0	0	0
aRSV182	Saccharibacteria	Unknown_Class	Unknown_Order	Unknown_Family	Candidatus_Saccharimonas	0	0	0	0	0	0	0	30	0	24	0	0	0	196	0	0	0	0	0	0	0	2	0	70	0	0	0	0	0	0	0	0	9	18	0	0	0	0	9	0	0	0	9	0
aRSV183	Actinobacteria	Actinobacteria	Actinomycetales	Actinomycetaceae	NA	44	0	0	0	23	0	0	0	0	0	0	0	125	32	0	0	0	0	0	8	28	0	0	0	0	0	28	0	0	0	0	0	9	0	0	0	0	0	0	0	99	0	0	0
aRSV184	Firmicutes	Negativicutes	Selenomonadales	Veillonellaceae	Selenomonas_4	0	0	0	0	0	0	0	0	0	0	0	0	37	69	7	0	0	0	0	0	20	0	0	0	260	125	0	0	0	0	0	0	6	0	0	0	0	0	0	0	0	0	0	0
aRSV185	Firmicutes	Clostridia	Clostridiales	Family_XIII	NA	0	0	28	0	0	0	0	0	0	0	0	0	0	0	0	0	0	0	0	0	156	0	13	0	13	0	8	176	90	0	0	0	8	41	0	0	0	0	0	0	62	0	0	0
aRSV186	Proteobacteria	Deltaproteobacteria	Desulfovibrionales	Desulfomicrobiaceae	Desulfoplanes	0	0	0	0	0	0	0	0	0	0	0	0	0	0	0	0	0	0	0	0	0	0	0	0	0	0	0	0	0	0	0	0	0	0	0	0	0	0	0	0	0	0	0	0
aRSV187	Bacteroidetes	Bacteroidia	Bacteroidales	Prevotellaceae	Prevotella	0	0	0	0	0	0	0	0	0	0	0	0	37	9	0	0	0	0	0	0	12	0	0	12	0	0	0	251	0	0	0	0	19	16	0	0	0	0	0	0	0	0	0	0
aRSV188	Firmicutes	Clostridia	Clostridiales	Lachnospiraceae	Oribacterium	5	0	0	0	43	189	0	90	0	8	0	0	0	104	0	0	0	0	0	0	0	0	0	177	0	0	0	0	0	0	0	0	0	0	0	0	0	73	0	0	0	35	0	0
aRSV189	Spirochaetae	Spirochaetes	Spirochaetales	Spirochaetaceae	Treponema_2	0	0	0	0	0	0	0	0	0	0	0	0	0	0	0	0	192	0	0	0	0	0	0	0	26	74	85	0	0	0	0	0	0	0	0	0	24	0	0	0	70	0	0	0
aRSV190	Fusobacteria	Fusobacteriia	Fusobacteriales	Leptotrichiaceae	Leptotrichia	0	0	0	0	10	0	0	430	0	33	0	0	57	0	0	0	55	0	0	0	0	0	8	12	0	0	0	0	0	0	0	0	0	29	0	0	0	0	0	0	0	0	0	0
aRSV191	Firmicutes	Clostridia	Clostridiales	Lachnospiraceae	NA	0	0	0	0	0	0	0	0	0	0	0	0	0	0	0	0	0	0	0	0	0	0	0	0	0	0	0	69	0	0	0	0	0	11	0	0	0	0	0	0	9	0	0	0
aRSV192	Bacteroidetes	Flavobacteriia	Flavobacteriales	Flavobacteriaceae	Capnocytophaga	0	21	0	0	0	0	0	0	0	18	0	0	165	0	65	35	0	0	0	0	0	0	0	0	0	0	0	0	0	0	13	0	0	19	0	0	0	0	0	0	11	0	0	0
aRSV193	Bacteroidetes	Bacteroidia	Bacteroidales	Prevotellaceae	Alloprevotella	0	0	0	51	0	0	36	19	9	0	13	0	17	27	65	15	49	0	0	0	95	178	0	0	31	111	0	131	0	0	14	0	302	79	0	0	65	0	0	0	0	0	46	0
aRSV194	Firmicutes	Clostridia	Clostridiales	Lachnospiraceae	Johnsonella	0	0	0	0	0	0	0	0	0	0	0	0	0	114	0	0	0	0	0	0	0	0	0	98	0	0	0	0	0	0	11	0	0	0	0	0	0	0	0	0	0	0	0	0
aRSV195	Firmicutes	Clostridia	Clostridiales	Lachnospiraceae	NA	0	0	0	0	0	0	0	0	0	0	0	0	0	0	0	0	0	0	0	0	0	0	0	0	56	434	165	160	0	0	0	0	49	48	0	0	0	0	0	0	0	0	32	0
aRSV196	Bacteroidetes	Bacteroidia	Bacteroidales	Prevotellaceae	Alloprevotella	35	15	0	0	0	0	107	1797	0	0	0	0	0	0	0	47	0	0	0	0	0	0	18	0	7	106	0	0	0	31	0	0	7	93	0	0	0	0	0	0	0	21	0	0
aRSV197	Firmicutes	Bacilli	Bacillales	Family_XII	Exiguobacterium	0	0	117	0	0	0	0	0	0	0	0	0	0	0	0	0	0	0	0	0	0	0	0	0	0	0	0	0	0	0	0	0	0	0	0	0	0	0	0	0	0	0	0	0
aRSV198	Spirochaetae	Spirochaetes	Spirochaetales	Spirochaetaceae	Treponema_2	0	0	0	0	0	0	0	0	0	0	0	0	0	0	0	0	0	0	0	0	0	0	0	0	0	0	0	0	0	0	0	0	0	0	0	0	0	0	0	0	0	0	0	0
aRSV199	Bacteroidetes	Bacteroidia	Bacteroidales	Prevotellaceae	Prevotella_7	0	0	0	0	0	313	0	10	0	0	14	0	22	225	0	0	77	142	60	47	843	115	0	140	15	88	0	707	0	0	13	0	52	50	31	82	0	15	0	0	85	0	4	0
aRSV200	Bacteroidetes	Bacteroidia	Bacteroidales	Prevotellaceae	Alloprevotella	6	0	0	0	0	212	0	132	0	0	0	0	0	70	0	0	0	0	4	0	0	0	0	0	0	0	0	3	0	0	18	0	29	274	0	0	0	19	15	91	35	140	0	0
aRSV201	Spirochaetae	Spirochaetes	Spirochaetales	Spirochaetaceae	Treponema_2	0	0	0	0	0	0	0	0	170	0	92	0	0	0	0	41	0	0	0	0	0	0	33	0	0	131	17	309	0	0	0	0	225	231	0	0	0	0	0	0	0	0	0	0
aRSV202	Saccharibacteria	NA	NA	NA	NA	0	66	0	0	0	0	0	0	0	16	0	0	0	0	24	0	0	0	0	0	0	0	0	0	0	0	0	46	0	0	0	0	0	107	0	0	0	0	0	0	0	682	0	0
aRSV203	Proteobacteria	Betaproteobacteria	Burkholderiales	Comamonadaceae	NA	0	0	0	0	0	0	125	0	0	0	0	0	67	0	0	24	0	0	49	24	0	0	12	0	0	0	33	105	0	0	0	0	17	24	16	0	0	0	58	57	90	0	0	12
aRSV204	Firmicutes	Negativicutes	Selenomonadales	Veillonellaceae	Anaeroglobus	0	0	0	0	0	1180	0	0	21	0	45	0	0	0	0	0	35	58	0	0	0	0	0	0	0	64	0	0	0	0	0	0	73	0	0	0	0	0	0	0	0	0	0	0
aRSV205	Bacteroidetes	Bacteroidia	Bacteroidales	Prevotellaceae	Prevotella	0	0	0	0	0	0	0	0	0	0	0	0	0	0	0	0	0	0	0	0	0	0	0	0	0	0	0	0	0	0	0	0	0	0	0	0	0	0	0	0	0	0	0	0
aRSV206	Firmicutes	Bacilli	Lactobacillales	Carnobacteriaceae	Granulicatella	0	0	0	0	0	0	0	0	0	0	0	0	0	0	15	12	0	0	0	0	0	0	0	0	0	0	0	0	0	0	18	0	69	49	0	0	0	0	0	0	35	199	0	0
aRSV207	Spirochaetae	Spirochaetes	Spirochaetales	Spirochaetaceae	Treponema_2	0	0	0	0	0	0	0	0	0	0	0	0	0	0	0	0	0	0	0	0	74	0	0	0	0	45	0	136	0	0	0	0	0	13	0	0	138	0	0	0	54	0	29	0
aRSV208	Firmicutes	Negativicutes	Selenomonadales	Veillonellaceae	Selenomonas_4	0	0	0	0	0	0	33	0	0	0	0	0	0	12	16	19	0	0	0	0	0	0	0	0	0	0	0	0	0	0	0	0	9	17	0	0	0	0	0	0	0	0	0	0
aRSV209	Proteobacteria	Alphaproteobacteria	NA	NA	NA	0	0	0	0	0	0	0	0	0	0	0	0	0	0	9	58	0	0	0	0	0	0	0	0	0	0	125	274	0	0	0	0	23	58	0	0	0	0	0	0	0	0	0	0
aRSV210	Actinobacteria	Actinobacteria	Actinomycetales	Actinomycetaceae	NA	0	0	0	0	21	0	0	0	0	0	0	0	0	0	0	0	0	0	0	0	0	0	0	21	0	0	0	0	0	0	0	0	57	25	0	3	0	0	0	0	0	0	0	0
aRSV211	Firmicutes	Clostridia	Clostridiales	Lachnospiraceae	Stomatobaculum	0	0	0	0	0	163	0	0	0	0	0	0	0	11	0	0	0	0	0	0	22	0	0	0	0	0	0	0	0	0	6	0	21	0	0	0	0	30	0	13	0	60	0	0
aRSV212	Bacteroidetes	Flavobacteriia	Flavobacteriales	Flavobacteriaceae	Bergeyella	0	0	0	0	0	0	17	0	63	114	0	0	0	0	0	0	0	0	0	0	24	0	0	27	7	0	0	4	0	0	0	0	58	227	0	0	0	0	18	22	54	41	0	0
aRSV213	Firmicutes	Erysipelotrichia	Erysipelotrichales	Erysipelotrichaceae	Erysipelotrichaceae_UCG-006	0	0	0	0	0	0	0	0	0	0	0	0	0	6	0	0	0	0	0	0	0	0	0	0	0	0	0	214	0	0	0	0	10	10	0	0	0	0	20	0	0	0	0	0
aRSV214	Bacteroidetes	Bacteroidia	Bacteroidales	Prevotellaceae	NA	0	0	0	0	0	112	0	24	0	0	0	0	0	45	0	5	20	65	34	14	236	76	0	0	0	18	0	355	0	60	10	0	20	0	0	0	0	0	0	0	180	0	0	0
aRSV215	Proteobacteria	Betaproteobacteria	Burkholderiales	Comamonadaceae	Comamonas	0	0	0	0	0	0	0	0	0	0	0	0	0	0	55	0	0	36	0	0	10	0	0	0	0	0	6	141	0	0	0	4	0	50	33	0	0	0	0	0	13	0	0	0
aRSV216	Firmicutes	Negativicutes	Selenomonadales	Veillonellaceae	Selenomonas	0	0	0	0	0	0	0	0	0	0	0	0	0	0	0	0	0	0	0	0	0	0	0	0	0	0	0	0	0	0	0	0	42	7	0	0	0	0	0	0	0	0	0	0
aRSV217	Actinobacteria	Actinobacteria	Corynebacteriales	Corynebacteriaceae	Corynebacterium	0	0	0	0	23	0	0	0	0	0	0	0	10	46	0	0	0	0	0	0	0	68	0	20	0	0	0	0	0	0	0	0	24	9	0	0	0	0	0	0	0	29	0	0
aRSV218	Firmicutes	Clostridia	Clostridiales	Family_XIII	Mogibacterium	0	0	0	0	0	0	125	0	0	0	0	0	0	7	0	0	12	2	56	21	54	0	0	0	0	0	55	11	10	0	0	18	0	0	15	12	3	6	0	0	28	6	0	0
aRSV219	Spirochaetae	Spirochaetes	Spirochaetales	Spirochaetaceae	Treponema_2	0	0	0	0	0	0	0	0	0	0	0	0	0	0	0	0	0	0	0	0	0	0	0	0	57	197	117	153	0	0	0	0	163	128	0	0	0	0	0	0	0	0	0	0
aRSV220	Firmicutes	Clostridia	Clostridiales	Family_XIII	Family_XIII_AD3011_group	0	0	0	0	0	0	0	0	0	0	0	0	0	0	0	0	0	0	0	0	0	0	0	0	0	0	0	0	0	0	0	0	0	0	0	0	0	0	0	0	0	0	0	0
aRSV221	Firmicutes	Bacilli	Lactobacillales	Enterococcaceae	Enterococcus	0	0	677	0	0	0	0	0	0	0	0	0	0	0	0	0	0	0	0	0	0	0	0	0	0	0	0	0	0	0	0	0	0	0	0	0	0	0	0	0	0	0	0	0
aRSV222	Bacteroidetes	Bacteroidia	Bacteroidales	Rikenellaceae	Rikenellaceae_RC9_gut_group	0	0	0	0	0	0	0	0	8	0	0	0	138	0	0	0	0	0	0	0	0	0	0	0	12	49	0	0	0	0	0	0	64	65	0	0	0	0	0	0	0	0	0	0
aRSV223	Actinobacteria	Coriobacteriia	Coriobacteriales	Coriobacteriaceae	Olsenella	0	0	0	0	0	0	0	0	0	0	0	0	14	0	0	0	0	0	97	0	84	0	0	0	0	0	0	34	0	0	0	0	13	0	16	24	0	0	0	0	0	0	0	0
aRSV224	Bacteroidetes	Bacteroidia	Bacteroidales	Prevotellaceae	Prevotella_7	0	0	0	0	0	0	18	0	0	0	0	0	17	0	0	0	42	0	0	0	0	0	0	0	0	0	0	0	0	0	0	0	15	49	0	0	0	0	0	0	0	0	0	0
aRSV225	Actinobacteria	Actinobacteria	Bifidobacteriales	Bifidobacteriaceae	Bifidobacterium	0	0	0	0	5	15	0	0	0	0	0	0	0	0	0	0	0	374	0	0	0	0	0	0	0	0	0	0	0	16	0	0	0	0	0	0	0	0	19	0	0	0	0	0
aRSV226	Tenericutes	Mollicutes	Acholeplasmatales	Acholeplasmataceae	Acholeplasma	0	0	0	0	0	0	0	0	0	0	0	0	0	0	0	0	0	0	0	0	247	0	0	0	0	0	0	0	0	0	0	0	0	0	0	0	0	0	0	0	0	0	0	0
aRSV227	Fusobacteria	Fusobacteriia	Fusobacteriales	Leptotrichiaceae	Leptotrichia	0	548	0	0	0	0	0	0	0	0	0	0	0	58	0	0	0	0	0	0	0	0	0	0	0	0	13	0	0	0	0	9	0	61	31	0	0	0	0	0	5	0	0	0
aRSV228	Bacteroidetes	Bacteroidia	Bacteroidales	Prevotellaceae	Prevotellaceae_UCG-004	0	0	0	0	0	0	0	0	0	0	0	0	0	0	0	0	0	0	0	0	75	0	0	0	0	0	0	134	0	0	0	0	0	0	0	0	0	0	0	0	0	0	0	0
aRSV229	Tenericutes	Mollicutes	Acholeplasmatales	Acholeplasmataceae	Acholeplasma	0	0	0	0	0	0	0	0	0	0	0	0	0	0	0	0	0	0	0	0	0	0	0	0	0	0	0	0	56	0	0	0	0	0	0	0	0	0	0	0	27	0	0	0
aRSV230	Actinobacteria	Coriobacteriia	Coriobacteriales	Coriobacteriaceae	Slackia	0	0	0	0	4	55	37	0	0	0	0	0	0	17	0	0	12	18	31	10	32	0	0	0	0	0	0	16	0	0	0	0	0	0	39	25	0	0	0	0	0	22	0	0
aRSV231	Proteobacteria	Epsilonproteobacteria	Campylobacterales	Helicobacteraceae	Wolinella	0	0	0	0	0	0	0	0	0	0	0	0	0	0	4	34	0	0	0	0	0	0	0	0	0	37	89	127	0	0	0	0	17	0	0	0	0	0	0	0	0	0	0	0
aRSV232	Spirochaetae	Spirochaetes	Spirochaetales	Spirochaetaceae	Treponema_2	0	0	0	0	0	0	0	0	0	0	0	0	0	0	43	32	0	0	0	0	0	0	49	0	0	0	0	0	0	0	0	0	89	63	0	0	0	0	0	0	0	0	0	0
aRSV233	Fusobacteria	Fusobacteriia	Fusobacteriales	Leptotrichiaceae	Leptotrichia	0	0	0	0	0	0	0	0	0	0	0	0	13	0	0	0	0	0	0	0	13	0	0	13	0	0	0	0	0	0	0	0	0	0	0	0	0	0	0	0	10	31	0	0
aRSV234	Spirochaetae	Spirochaetes	Spirochaetales	Spirochaetaceae	Treponema_2	0	0	0	0	0	0	0	0	0	0	0	0	0	0	0	0	0	0	0	0	0	0	23	0	256	446	0	0	0	0	0	0	107	65	0	0	0	0	0	0	0	0	0	9
aRSV235	Firmicutes	Clostridia	Clostridiales	Lachnospiraceae	Lachnoanaerobaculum	0	0	0	0	0	0	0	0	0	0	0	0	96	32	0	0	0	0	0	0	0	0	0	0	0	0	0	0	0	0	0	0	19	52	0	0	0	0	0	0	0	0	0	0
aRSV236	Proteobacteria	Deltaproteobacteria	Desulfovibrionales	Desulfovibrionaceae	Desulfovibrio	0	0	103	51	0	0	0	0	50	0	0	0	18	0	0	0	113	0	0	0	0	0	17	0	0	0	0	0	0	0	0	0	0	0	0	0	5	0	0	0	0	0	0	0
aRSV237	Bacteroidetes	Flavobacteriia	Flavobacteriales	Flavobacteriaceae	Capnocytophaga	0	0	0	0	0	0	0	0	0	0	0	0	45	0	0	0	69	0	0	5	0	0	3	0	0	0	4	0	0	0	0	0	7	11	0	6	0	30	0	0	0	0	0	0
aRSV238	Firmicutes	Clostridia	Clostridiales	Lachnospiraceae	Oribacterium	0	0	0	0	0	0	0	0	0	0	0	0	0	0	0	0	257	0	0	0	0	0	0	0	0	0	0	0	0	0	0	0	26	0	0	0	0	0	0	0	0	0	0	0
aRSV239	Saccharibacteria	NA	NA	NA	NA	0	0	0	0	0	7	0	0	0	9	0	0	35	399	0	0	0	0	0	0	0	0	14	29	0	0	0	0	0	0	25	0	23	114	15	0	0	0	0	0	78	309	0	0
aRSV240	Proteobacteria	Deltaproteobacteria	Desulfovibrionales	Desulfomicrobiaceae	Desulfomicrobium	0	0	0	0	0	0	0	0	0	0	0	0	0	0	0	0	0	0	0	0	0	0	0	0	0	0	0	0	0	0	0	0	0	0	0	0	0	0	0	0	0	0	0	0
aRSV241	Bacteroidetes	Bacteroidia	Bacteroidales	Prevotellaceae	Prevotella_7	0	0	0	0	0	45	0	0	0	0	0	0	0	0	0	0	0	0	0	0	103	0	0	0	0	0	0	0	0	0	0	0	0	0	0	0	0	0	0	0	0	0	0	0
aRSV242	Firmicutes	Bacilli	Lactobacillales	Streptococcaceae	Streptococcus	0	0	0	0	0	0	0	0	0	0	0	0	0	0	0	0	286	0	0	0	0	0	0	0	0	0	0	0	0	0	0	0	0	0	0	0	0	0	0	0	0	0	0	0
aRSV243	Fusobacteria	Fusobacteriia	Fusobacteriales	Leptotrichiaceae	Leptotrichia	0	0	0	0	0	0	0	0	0	0	0	0	0	0	0	0	0	0	0	0	0	0	0	107	0	0	0	0	0	0	0	0	0	0	0	0	0	0	0	0	0	0	0	0
aRSV244	Spirochaetae	Spirochaetes	Spirochaetales	Spirochaetaceae	Treponema_2	0	0	0	0	0	0	0	0	0	0	0	0	0	0	0	0	0	0	0	0	0	0	0	0	74	214	99	394	0	0	0	0	130	130	0	0	0	0	0	0	0	0	0	0
aRSV245	Bacteroidetes	Bacteroidia	Bacteroidales	Prevotellaceae	Prevotella_7	0	0	0	0	0	0	0	0	0	0	0	0	0	0	0	0	0	0	0	0	0	0	0	0	0	0	0	0	0	0	0	0	0	0	0	0	0	0	0	0	0	0	0	0
aRSV246	Gracilibacteria	NA	NA	NA	NA	0	0	0	0	0	0	0	0	0	0	0	0	0	0	0	0	0	0	0	0	0	0	0	0	0	8	0	0	0	0	0	0	0	0	0	0	0	0	0	0	7	0	0	0
aRSV247	Saccharibacteria	NA	NA	NA	NA	0	0	0	0	0	0	0	0	0	0	0	0	0	0	0	0	0	0	0	0	0	0	0	0	0	0	0	0	0	0	0	0	0	0	0	0	0	0	0	0	0	0	0	0
aRSV248	Firmicutes	Negativicutes	Selenomonadales	Veillonellaceae	Veillonella	0	0	0	0	0	0	0	0	0	0	0	0	0	0	0	0	0	0	0	0	0	0	0	0	0	0	0	0	0	0	0	0	0	31	0	0	0	0	0	0	15	20	0	0
aRSV249	Firmicutes	Negativicutes	Selenomonadales	Veillonellaceae	NA	0	0	0	0	0	0	0	0	0	0	0	0	0	22	0	0	0	0	0	0	0	0	0	0	0	0	0	0	0	0	0	0	0	0	0	0	0	0	0	0	0	0	0	0
aRSV250	Firmicutes	Clostridia	Clostridiales	Family_XIII	NA	0	0	0	0	0	0	0	0	0	0	0	0	0	0	0	0	0	0	0	0	0	0	0	0	0	0	0	0	0	0	0	0	19	70	0	0	0	0	0	0	0	0	0	0
aRSV251	Saccharibacteria	Unknown_Class	Unknown_Order	Unknown_Family	Candidatus_Saccharimonas	0	0	0	0	0	0	0	0	0	0	0	0	0	0	0	0	0	0	0	0	0	0	104	0	0	0	0	0	0	0	0	0	42	120	0	0	0	0	0	0	0	0	23	0
aRSV252	Gracilibacteria	NA	NA	NA	NA	0	0	0	0	0	0	0	0	0	0	0	0	52	0	0	0	0	0	0	0	0	0	0	0	0	0	0	0	0	0	0	5	9	51	2	0	0	0	0	0	0	0	0	0
aRSV253	Bacteroidetes	Sphingobacteriia	Sphingobacteriales	Lentimicrobiaceae	NA	0	0	0	0	0	0	0	0	85	0	0	0	0	0	0	0	0	0	0	0	0	0	56	0	0	31	0	0	0	0	0	0	16	48	0	0	0	0	0	0	0	0	0	0
aRSV254	Proteobacteria	Gammaproteobacteria	Alteromonadales	Alteromonadaceae	Alishewanella	0	0	215	0	0	0	0	0	0	0	0	0	0	0	0	0	0	0	0	0	0	0	0	0	0	0	0	0	0	0	0	0	0	0	0	0	0	0	0	0	0	0	0	0
aRSV255	Proteobacteria	Alphaproteobacteria	Rickettsiales	Rickettsiales_Incertae_Sedis	Candidatus_Hepatincola	0	0	0	0	0	0	0	0	0	0	0	0	0	0	0	0	0	0	0	0	0	0	0	0	0	0	0	0	0	0	0	0	0	0	0	0	0	0	0	0	0	0	0	0
aRSV256	Firmicutes	Clostridia	Clostridiales	Lachnospiraceae	Howardella	0	0	0	0	0	36	0	0	0	0	9	0	0	19	0	0	18	9	0	0	0	38	0	0	0	11	0	11	0	0	0	0	5	23	0	0	0	0	0	0	0	0	0	0
aRSV257	Firmicutes	Clostridia	Clostridiales	Lachnospiraceae	Lachnoanaerobaculum	0	0	0	0	0	0	0	0	0	0	0	0	0	0	0	0	0	0	0	0	0	0	0	0	0	0	0	0	0	0	0	0	0	0	0	0	0	0	0	0	0	0	0	0
aRSV258	Bacteroidetes	Bacteroidia	Bacteroidales	Prevotellaceae	NA	0	0	0	0	0	0	5	0	0	0	0	0	0	0	0	0	0	0	0	16	0	0	0	0	0	0	0	0	0	0	0	0	0	7	0	0	0	0	0	0	0	0	0	0
aRSV259	Bacteroidetes	Bacteroidia	Bacteroidales	Prevotellaceae	Prevotella_2	0	0	0	0	0	0	67	299	0	0	0	0	0	0	0	0	0	0	0	0	0	0	0	0	0	23	0	0	0	0	0	0	0	0	0	0	0	65	0	0	0	0	0	0
aRSV260	Firmicutes	Clostridia	Clostridiales	Clostridiales_vadinBB60_group	NA	0	0	0	0	0	0	0	0	0	0	0	0	0	0	16	11	0	0	0	0	17	0	0	0	0	0	0	0	0	0	0	0	0	0	0	0	0	0	0	0	0	0	0	0
aRSV261	Bacteroidetes	Bacteroidia	Bacteroidales	Prevotellaceae	Prevotella	0	0	0	0	17	56	0	11	0	0	0	0	0	0	0	0	0	0	0	0	0	0	0	0	0	0	0	0	0	0	27	0	0	14	0	0	0	0	0	0	12	77	0	0
aRSV262	Firmicutes	Bacilli	Lactobacillales	Lactobacillaceae	Lactobacillus	0	0	0	0	0	0	0	0	0	0	0	0	0	0	0	0	0	54	0	0	116	46	0	0	0	0	0	0	0	0	0	0	0	0	0	0	0	0	0	0	0	0	0	0
aRSV263	Bacteroidetes	Bacteroidia	Bacteroidales	Rikenellaceae	Blvii28_wastewater-sludge_group	0	0	0	0	8	0	109	0	0	0	0	0	0	0	0	0	0	0	0	0	0	0	0	0	0	0	31	49	0	0	0	0	15	0	0	0	0	0	0	0	0	0	0	0
aRSV264	Bacteroidetes	Bacteroidia	Bacteroidales	Prevotellaceae	Prevotella_7	0	0	0	0	0	0	0	0	0	0	0	0	0	15	0	0	0	0	0	0	0	0	0	0	0	0	0	0	0	0	0	0	0	0	0	0	0	0	0	0	82	3	0	0
aRSV265	Firmicutes	Clostridia	Clostridiales	Lachnospiraceae	NA	0	0	0	0	0	0	0	0	0	0	0	0	13	0	0	0	0	0	0	0	43	0	0	0	0	0	0	0	0	0	0	0	0	0	0	0	0	0	0	0	0	0	0	0
aRSV266	WS6	NA	NA	NA	NA	0	0	20	0	0	0	0	0	0	0	0	0	0	0	0	0	0	0	0	0	0	0	27	0	0	0	0	0	0	0	0	0	0	0	0	0	0	0	0	0	0	0	0	0
aRSV267	Firmicutes	Erysipelotrichia	Erysipelotrichales	Erysipelotrichaceae	Eggerthia	0	0	0	0	0	0	0	0	0	0	0	0	0	0	0	0	5	0	18	6	12	0	0	0	0	0	0	46	0	0	0	0	0	0	0	0	0	0	0	5	0	0	0	0
aRSV268	Spirochaetae	Spirochaetes	Spirochaetales	Spirochaetaceae	Treponema_2	0	0	0	0	0	0	0	0	104	0	0	0	0	0	24	0	0	0	0	0	0	0	0	0	0	0	0	0	0	0	0	0	0	0	0	0	0	0	0	0	0	0	36	6
aRSV269	Actinobacteria	Actinobacteria	Propionibacteriales	Propionibacteriaceae	Propionibacterium	0	0	0	0	0	36	0	0	0	0	0	0	0	0	0	0	0	0	0	0	22	0	0	0	0	0	0	0	0	0	0	0	0	0	0	0	0	0	0	0	0	0	0	0
aRSV270	Saccharibacteria	Unknown_Class	Unknown_Order	Unknown_Family	Candidatus_Saccharimonas	0	0	0	0	0	0	0	0	0	0	0	0	0	0	0	0	0	0	0	0	44	0	0	0	0	0	0	0	0	0	0	0	0	0	0	0	0	0	0	0	0	0	0	0
aRSV271	Bacteroidetes	Bacteroidia	Bacteroidales	Prevotellaceae	Prevotella	0	0	0	0	0	0	0	0	0	0	0	0	0	0	0	0	0	0	0	0	0	0	0	0	0	0	0	0	0	0	0	0	0	0	0	0	0	0	0	0	0	0	0	0
aRSV272	Spirochaetae	Spirochaetes	Spirochaetales	Spirochaetaceae	Treponema_2	0	0	0	0	0	0	0	0	0	0	5	0	0	6	0	0	0	0	0	0	0	0	0	0	0	6	0	22	0	0	0	0	4	3	0	0	0	0	18	0	8	20	0	0
aRSV273	Firmicutes	Bacilli	Lactobacillales	Lactobacillaceae	Lactobacillus	0	0	0	0	0	0	0	0	0	0	0	0	0	0	0	0	0	14	0	0	134	0	0	0	0	0	0	0	0	0	0	0	0	0	0	0	0	0	0	0	0	0	0	0
aRSV274	Firmicutes	Bacilli	Lactobacillales	Streptococcaceae	Lactococcus	0	0	5	0	0	0	0	0	0	0	0	0	0	0	0	0	0	0	0	0	0	0	0	0	0	0	0	0	0	0	0	0	0	0	0	0	0	0	0	0	0	0	0	0
aRSV275	Fusobacteria	Fusobacteriia	Fusobacteriales	Leptotrichiaceae	Leptotrichia	0	0	0	0	0	0	0	0	0	0	0	0	0	0	0	0	0	0	0	0	0	0	0	0	0	0	0	0	0	0	0	0	0	0	0	0	0	0	0	0	0	0	0	0
aRSV276	Bacteroidetes	Bacteroidia	Bacteroidales	Porphyromonadaceae	Dysgonomonas	0	0	142	0	0	0	0	0	0	0	0	0	0	0	0	0	0	0	0	0	0	0	0	0	0	0	0	0	0	0	0	0	0	0	0	0	0	0	0	0	0	0	0	0
aRSV277	Firmicutes	Clostridia	Clostridiales	Family_XII	Fusibacter	0	0	325	0	0	0	0	0	0	0	0	0	0	0	0	0	0	0	0	0	0	0	0	0	0	0	0	0	0	0	0	0	0	0	0	0	0	0	0	0	0	0	0	0
aRSV278	Bacteroidetes	Sphingobacteriia	Sphingobacteriales	Lentimicrobiaceae	NA	0	0	0	0	0	0	0	0	0	0	0	0	0	0	0	0	0	0	0	0	0	0	0	0	0	0	0	0	0	0	0	0	11	11	0	0	0	0	0	0	0	0	0	0
aRSV279	Actinobacteria	Actinobacteria	Actinomycetales	Actinomycetaceae	Actinomyces	0	0	0	0	80	4	0	0	0	0	0	0	2	30	0	0	11	0	0	0	114	0	0	0	0	0	0	0	0	0	0	0	8	0	0	0	0	0	0	0	51	0	0	0
aRSV280	Firmicutes	Clostridia	Clostridiales	Lachnospiraceae	Oribacterium	0	0	0	0	0	0	0	0	0	0	0	0	5	0	0	0	28	4	0	0	4	6	0	0	0	0	0	0	0	0	0	0	13	0	0	0	10	0	0	0	0	0	0	0
aRSV281	Tenericutes	Mollicutes	Acholeplasmatales	Acholeplasmataceae	Acholeplasma	0	0	0	0	0	0	0	0	0	0	0	0	0	0	0	0	0	0	0	0	0	0	0	0	0	0	0	0	0	0	0	0	34	9	0	0	0	0	0	0	0	0	0	0
aRSV282	Bacteroidetes	Bacteroidia	Bacteroidales	Prevotellaceae	Prevotella	0	0	0	0	0	0	0	0	0	0	0	0	0	0	0	0	0	0	0	0	0	0	0	0	0	0	0	0	0	0	0	0	0	0	0	0	0	0	0	0	0	0	0	0
aRSV283	Proteobacteria	Betaproteobacteria	Rhodocyclales	Rhodocyclaceae	Propionivibrio	0	0	0	0	0	0	0	0	0	0	0	0	12	0	0	0	0	0	0	0	0	0	0	0	0	0	10	41	0	0	0	0	0	12	0	0	0	0	0	0	7	0	0	0
aRSV284	Bacteroidetes	Bacteroidia	Bacteroidales	Bacteroidaceae	Bacteroides	0	0	0	0	0	0	0	0	0	0	0	0	9	5	0	0	0	0	9	0	0	0	0	0	0	19	0	0	0	0	6	12	0	52	0	0	0	0	0	0	0	0	0	0
aRSV285	Firmicutes	Clostridia	Clostridiales	Family_XIII	NA	0	0	0	0	0	0	0	0	0	0	0	0	8	0	0	0	0	0	70	10	25	0	0	0	0	0	0	0	11	0	0	12	2	3	0	0	0	0	0	0	0	0	0	0
aRSV286	Bacteroidetes	Bacteroidia	Bacteroidales	Bacteroidales_BS11_gut_group	NA	0	0	45	0	0	0	0	0	0	0	0	0	0	0	0	0	0	0	0	0	0	0	0	0	0	0	0	0	0	0	0	0	0	0	0	0	0	0	0	0	0	0	0	0
aRSV287	Firmicutes	Negativicutes	Selenomonadales	Veillonellaceae	Dialister	0	0	0	0	0	254	0	0	16	0	18	0	0	0	0	0	0	4	0	0	0	0	0	0	0	0	0	0	0	0	0	0	0	0	0	0	20	8	0	0	0	0	0	0
aRSV288	Proteobacteria	Betaproteobacteria	Neisseriales	Neisseriaceae	NA	0	0	0	0	0	0	0	0	0	0	0	0	0	0	0	0	0	0	0	0	11	0	0	0	0	0	0	0	0	0	0	0	0	0	0	0	0	0	0	0	0	0	0	0
aRSV289	Proteobacteria	Deltaproteobacteria	Bradymonadales	NA	NA	0	0	0	0	0	0	0	0	0	0	0	0	0	0	0	0	0	0	0	0	0	0	0	0	0	0	0	0	0	0	0	0	0	5	0	0	0	0	0	0	0	0	0	0
aRSV290	Firmicutes	Negativicutes	Selenomonadales	Veillonellaceae	NA	0	0	0	0	0	0	0	0	0	0	0	0	0	0	0	0	0	0	0	0	0	0	0	0	0	0	0	0	0	0	0	0	0	0	0	0	0	0	0	0	0	0	0	0
aRSV291	Spirochaetae	Spirochaetes	Spirochaetales	Spirochaetaceae	Treponema_2	0	0	0	0	0	0	0	0	0	0	0	0	0	0	19	0	0	0	0	0	0	0	19	0	20	116	0	0	0	0	0	0	16	44	0	0	0	0	0	0	0	0	0	0
aRSV292	Saccharibacteria	Unknown_Class	Unknown_Order	Unknown_Family	Candidatus_Saccharimonas	0	0	0	0	0	0	0	0	0	0	0	0	0	0	0	0	0	0	0	0	0	0	0	0	0	0	0	0	0	0	0	0	39	0	0	0	0	0	0	0	0	0	0	0
aRSV293	Bacteroidetes	Bacteroidia	Bacteroidales	Prevotellaceae	Prevotella_7	0	0	0	0	0	0	0	0	0	0	0	0	0	0	0	0	0	0	0	0	0	0	0	0	0	0	0	0	0	0	0	0	0	0	0	0	0	0	0	0	0	0	0	0
aRSV294	Actinobacteria	Coriobacteriia	Coriobacteriales	Coriobacteriaceae	Cryptobacterium	0	0	0	0	0	19	0	0	0	0	0	0	0	90	0	0	0	14	0	0	27	10	0	0	0	0	0	0	0	0	0	0	0	0	0	0	0	0	8	0	0	0	0	0
aRSV295	NA	NA	NA	NA	NA	0	0	0	0	0	0	0	0	0	0	0	0	0	0	0	0	0	0	11	8	0	0	0	0	0	0	0	0	0	0	0	0	0	0	4	0	0	0	9	4	47	0	0	0
aRSV296	Bacteroidetes	Bacteroidia	Bacteroidales	Bacteroidaceae	Bacteroides	0	0	6	0	0	0	0	0	0	0	0	0	0	0	0	0	0	0	0	0	0	0	0	0	0	0	0	0	0	0	0	0	0	0	0	0	0	0	0	0	0	0	0	0
aRSV297	Bacteroidetes	Bacteroidia	Bacteroidales	Prevotellaceae	Prevotella_7	0	0	0	0	0	0	0	0	0	0	0	0	0	0	0	0	0	0	0	0	0	0	0	0	0	0	0	0	0	0	0	0	0	0	0	0	0	0	0	0	0	0	0	0
aRSV298	Firmicutes	Clostridia	Clostridiales	Syntrophomonadaceae	Pelospora	0	0	0	0	0	0	0	0	0	0	0	0	0	0	0	0	0	0	0	0	0	0	0	0	0	0	0	0	30	0	0	0	0	0	0	0	0	0	0	0	0	0	0	0
aRSV299	Proteobacteria	Gammaproteobacteria	Pseudomonadales	Moraxellaceae	Acinetobacter	0	0	0	0	0	16	0	0	0	0	0	22	0	94	0	0	5	33	0	0	0	0	0	0	0	0	0	0	0	0	0	0	0	0	0	0	0	0	0	0	0	0	0	0
aRSV300	Firmicutes	Clostridia	Clostridiales	Clostridiaceae_1	Clostridium_sensu_stricto_3	0	0	61	0	0	0	0	0	0	0	0	0	0	0	0	0	0	0	0	0	0	0	0	0	0	0	0	0	0	0	0	0	0	0	0	0	0	0	0	0	0	0	0	0
aRSV301	Bacteroidetes	Bacteroidia	Bacteroidales	Prevotellaceae	Prevotella_7	0	0	0	0	0	0	0	0	0	0	0	0	0	0	0	0	0	0	0	0	0	0	0	0	0	0	0	0	0	0	0	0	0	0	0	0	0	0	0	0	0	0	0	0
aRSV302	Bacteroidetes	Bacteroidia	Bacteroidales	Rikenellaceae	Rikenellaceae_RC9_gut_group	0	0	54	0	0	0	0	0	0	0	0	0	0	0	0	0	0	0	0	0	0	0	0	0	0	0	0	0	0	0	0	0	0	0	0	0	0	0	0	0	0	0	0	0
aRSV303	Firmicutes	Clostridia	Clostridiales	Family_XI	Ezakiella	0	0	0	0	0	0	0	0	0	0	0	0	0	0	0	0	0	0	0	0	0	0	0	0	0	0	0	0	0	0	0	0	22	124	0	0	0	0	0	0	0	0	0	0
aRSV304	Firmicutes	Clostridia	Clostridiales	Lachnospiraceae	Lachnospiraceae_NK3A20_group	0	0	0	0	0	0	0	0	0	0	0	0	0	0	0	0	0	0	0	0	0	0	0	0	0	0	0	0	0	0	0	0	0	0	0	0	0	0	0	0	0	0	0	0
aRSV305	Fusobacteria	Fusobacteriia	Fusobacteriales	Leptotrichiaceae	NA	0	0	70	0	0	0	0	0	0	0	0	0	0	0	0	0	0	0	0	0	0	0	0	0	0	0	0	0	0	0	0	0	0	0	0	0	0	0	0	0	0	0	0	0
aRSV306	Firmicutes	Clostridia	Clostridiales	Lachnospiraceae	Roseburia	0	0	0	0	0	0	0	0	0	0	0	0	0	0	0	0	0	0	0	0	0	0	0	0	0	0	0	0	0	0	0	0	0	0	0	0	0	0	0	0	0	0	99	51
aRSV307	Proteobacteria	Gammaproteobacteria	Pseudomonadales	Moraxellaceae	Enhydrobacter	0	0	0	0	0	0	0	0	0	0	0	0	0	0	0	0	0	0	0	0	0	0	0	0	0	0	0	0	0	0	0	0	0	0	0	0	0	0	0	0	0	0	0	0
aRSV308	Proteobacteria	Deltaproteobacteria	Desulfovibrionales	Desulfovibrionaceae	Bilophila	0	0	0	0	0	0	0	0	0	0	152	0	0	0	0	0	0	0	0	0	0	0	0	0	0	0	0	0	0	0	0	0	0	0	0	0	0	0	0	0	0	0	0	0
aRSV309	Firmicutes	Negativicutes	Selenomonadales	Veillonellaceae	Selenomonas	0	0	0	0	0	0	0	0	0	0	0	0	0	0	0	0	0	0	0	0	0	0	0	0	0	0	0	0	0	0	0	0	21	0	0	0	0	0	0	0	0	0	0	0
aRSV310	Bacteroidetes	Bacteroidia	Bacteroidales	Bacteroidaceae	Bacteroides	0	0	42	0	0	0	0	0	0	0	0	0	0	0	0	0	0	0	0	0	0	0	0	0	0	0	0	0	0	0	0	0	0	0	0	0	0	0	0	0	0	0	0	0
aRSV311	Bacteroidetes	Bacteroidia	Bacteroidales	Prevotellaceae	Prevotella_7	0	0	0	0	0	0	0	0	0	0	0	0	0	0	0	0	0	0	0	0	0	0	0	0	0	0	0	0	0	0	0	0	0	0	0	0	0	0	0	0	0	0	0	0
aRSV312	Firmicutes	Bacilli	Lactobacillales	Lactobacillaceae	Lactobacillus	0	0	0	0	0	0	0	0	0	0	0	0	198	0	0	0	0	0	0	0	0	4	0	0	0	0	0	0	0	0	0	0	0	0	0	0	0	0	0	0	0	0	0	0
aRSV313	Proteobacteria	Betaproteobacteria	Neisseriales	Neisseriaceae	Kingella	0	0	0	0	0	0	0	0	0	0	0	0	0	0	0	0	0	0	0	0	0	0	0	0	0	0	0	0	0	0	0	0	22	42	0	0	0	0	0	0	0	0	0	0
aRSV314	Bacteroidetes	Flavobacteriia	Flavobacteriales	Flavobacteriaceae	Flavobacterium	0	0	19	0	0	0	0	0	3	0	0	0	0	0	4	3	0	0	0	0	0	0	0	0	0	6	0	0	0	0	0	0	0	0	0	0	0	0	0	0	0	0	0	0
aRSV315	Bacteroidetes	Bacteroidia	Bacteroidales	Rikenellaceae	Rikenellaceae_RC9_gut_group	0	0	0	0	0	0	0	0	0	0	0	0	0	0	0	0	0	0	73	6	0	0	0	0	0	0	0	0	0	0	0	0	0	0	0	0	0	0	0	0	0	0	0	0
aRSV316	Firmicutes	Clostridia	Clostridiales	Lachnospiraceae	Lachnoclostridium_5	0	0	19	0	0	0	0	0	0	0	0	0	0	0	0	0	0	0	0	0	0	0	0	0	0	0	0	0	0	0	0	0	0	0	0	0	0	0	0	0	0	0	0	0
aRSV317	Gracilibacteria	NA	NA	NA	NA	0	0	0	0	0	0	0	0	0	30	0	0	0	0	0	0	0	0	0	0	0	0	0	0	0	0	0	0	0	0	0	0	0	0	0	0	0	0	0	0	0	0	0	0
aRSV318	Spirochaetae	Spirochaetes	Spirochaetales	Spirochaetaceae	Treponema_2	0	0	0	0	0	0	0	0	0	0	0	0	0	0	0	0	0	0	0	0	0	0	0	0	0	41	0	0	0	0	0	0	15	44	0	0	0	0	0	0	0	0	0	0
aRSV319	Firmicutes	Negativicutes	Selenomonadales	Veillonellaceae	Dialister	0	0	0	0	0	0	0	0	0	0	0	0	0	0	0	0	0	0	0	0	0	0	0	0	0	0	0	0	0	0	0	0	0	0	0	0	0	0	0	0	0	0	0	0
aRSV320	Proteobacteria	Gammaproteobacteria	Cardiobacteriales	Cardiobacteriaceae	Cardiobacterium	0	0	0	0	0	0	0	0	0	0	0	0	0	0	0	0	0	0	0	0	0	0	0	0	0	0	0	0	0	0	0	0	0	0	0	0	0	0	0	0	0	0	0	0
aRSV321	Firmicutes	Clostridia	Clostridiales	Family_XIII	NA	0	0	0	0	0	0	0	0	0	0	0	0	0	0	0	0	0	0	0	0	0	0	0	0	0	0	0	0	0	0	0	0	0	0	0	0	0	0	0	0	0	0	0	0
aRSV322	Firmicutes	Bacilli	Bacillales	Staphylococcaceae	Staphylococcus	24	0	0	0	0	0	0	0	0	0	0	0	0	47	0	0	0	0	0	0	0	0	0	0	0	0	0	0	0	0	0	0	0	0	0	0	0	0	0	0	0	0	0	0
aRSV323	Proteobacteria	Gammaproteobacteria	Cardiobacteriales	Cardiobacteriaceae	Cardiobacterium	0	0	0	0	0	0	0	0	0	0	0	0	0	0	0	0	0	0	0	0	0	0	0	0	0	0	0	0	0	0	0	0	0	37	0	0	0	0	0	0	0	0	0	0
aRSV324	Actinobacteria	Actinobacteria	Actinomycetales	Actinomycetaceae	Actinomyces	0	0	0	0	0	0	0	0	0	0	0	0	0	0	0	0	0	0	0	0	0	0	0	0	0	0	0	0	0	0	0	0	0	0	0	0	0	0	0	0	0	0	0	0
aRSV325	Bacteroidetes	Bacteroidia	Bacteroidales	Porphyromonadaceae	Dysgonomonas	0	0	9	0	0	0	0	0	0	0	0	0	0	0	0	0	0	0	0	0	0	0	0	0	0	0	0	0	0	0	0	0	0	0	0	0	0	0	0	0	0	0	0	0
aRSV326	Firmicutes	Clostridia	Clostridiales	Family_XIII	Anaerovorax	0	0	0	0	0	0	0	0	0	0	0	0	0	0	0	0	0	0	0	0	0	0	16	0	0	0	0	0	0	0	0	0	0	0	0	0	0	0	0	0	0	0	0	0
aRSV327	Elusimicrobia	Elusimicrobia	Lineage_IV	NA	NA	0	0	0	0	0	0	0	0	0	0	0	0	0	0	0	0	0	0	0	0	0	0	0	0	0	0	0	0	0	0	0	0	0	0	0	0	0	0	0	0	0	0	0	0
aRSV328	Firmicutes	Clostridia	Clostridiales	Ruminococcaceae	Candidatus_Soleaferrea	0	0	0	0	0	0	0	0	57	9	0	0	0	0	0	0	0	0	0	0	0	0	0	0	0	0	0	0	0	0	0	0	0	0	0	0	0	0	0	0	0	0	0	0
aRSV329	Proteobacteria	Gammaproteobacteria	Enterobacteriales	Enterobacteriaceae	Klebsiella	0	0	0	0	0	0	0	0	0	0	0	0	0	0	0	0	0	0	0	0	0	0	0	0	0	0	0	0	0	0	0	0	0	0	0	0	0	0	0	0	0	0	0	0
aRSV330	Firmicutes	Clostridia	Clostridiales	Ruminococcaceae	Intestinimonas	0	0	71	0	0	0	0	0	0	0	0	0	0	0	0	0	0	0	0	0	0	0	0	0	0	0	0	0	0	0	0	0	6	24	0	0	0	0	0	0	0	0	0	0
aRSV331	Bacteroidetes	Bacteroidia	Bacteroidales	Porphyromonadaceae	Paludibacter	0	0	29	0	0	0	0	0	0	0	0	0	0	0	0	0	0	0	0	0	0	0	0	0	0	0	0	0	0	0	0	0	0	0	0	0	0	0	0	0	0	0	0	0
aRSV332	Firmicutes	Clostridia	Clostridiales	Family_XI	Peptoniphilus	0	0	0	0	0	0	0	0	0	0	0	0	0	0	0	0	0	0	0	0	0	0	0	0	0	0	0	0	0	0	0	0	0	0	0	0	0	0	0	0	0	0	0	0
aRSV333	Bacteroidetes	Bacteroidia	Bacteroidales	NA	NA	0	0	0	0	0	0	0	0	0	0	0	0	0	0	0	0	0	0	0	0	0	0	0	0	0	0	0	0	0	0	0	0	0	0	0	0	0	0	0	0	0	0	0	0
aRSV334	Actinobacteria	Actinobacteria	Actinomycetales	Actinomycetaceae	Actinomyces	0	0	0	0	0	15	0	0	0	0	0	0	0	0	0	0	0	0	0	0	0	0	0	0	0	0	0	0	0	0	0	0	0	0	0	0	0	0	0	0	0	0	0	0
aRSV335	Actinobacteria	Actinobacteria	Corynebacteriales	Corynebacteriaceae	Lawsonella	0	0	0	0	0	0	0	0	0	0	0	0	0	0	0	0	0	0	0	0	0	0	0	0	0	0	0	0	0	0	0	0	0	0	0	0	0	0	0	0	0	0	0	0
aRSV336	Actinobacteria	Actinobacteria	Propionibacteriales	Propionibacteriaceae	Propionibacterium	0	0	0	0	0	0	0	0	0	0	0	0	0	0	0	0	0	0	0	0	16	0	0	0	0	0	0	0	0	0	0	0	0	0	0	0	0	0	0	0	0	0	0	0
aRSV337	Firmicutes	Clostridia	Clostridiales	Lachnospiraceae	NA	0	0	0	0	0	0	0	0	0	0	0	0	0	0	0	0	0	0	0	0	0	0	0	0	0	0	0	0	0	0	0	0	0	0	0	0	0	0	0	0	0	0	0	0
aRSV338	Bacteroidetes	Bacteroidia	Bacteroidales	Porphyromonadaceae	Dysgonomonas	0	0	20	0	0	0	0	0	0	0	0	0	0	0	0	0	0	0	0	0	0	0	0	0	0	0	0	0	0	0	0	0	0	0	0	0	0	0	0	0	0	0	0	0
aRSV339	Bacteroidetes	Flavobacteriia	Flavobacteriales	Flavobacteriaceae	Cloacibacterium	0	0	45	0	0	0	0	0	0	0	0	11	0	9	0	0	0	3	0	0	0	0	0	0	0	0	0	0	0	0	0	0	0	0	0	0	0	0	0	0	0	0	0	0
aRSV340	Saccharibacteria	NA	NA	NA	NA	0	0	0	0	0	0	0	0	0	0	0	0	12	0	0	0	0	0	0	0	0	0	0	0	0	0	0	0	0	0	0	0	0	0	0	0	0	0	0	0	0	0	0	0
aRSV341	Proteobacteria	Betaproteobacteria	Burkholderiales	Comamonadaceae	Diaphorobacter	0	0	0	0	0	0	0	0	0	0	0	0	0	18	0	0	0	9	0	0	0	0	0	0	0	0	0	0	0	0	0	0	0	0	0	0	0	0	0	0	0	0	0	0
aRSV342	Bacteroidetes	Bacteroidia	Bacteroidales	Prevotellaceae	NA	0	0	0	0	0	0	0	0	0	0	0	0	0	0	0	0	0	0	0	0	0	0	0	0	0	0	0	0	0	0	0	0	0	0	0	0	0	0	0	0	0	0	0	0
aRSV343	Proteobacteria	Deltaproteobacteria	Myxococcales	Phaselicystidaceae	Phaselicystis	0	0	0	0	0	0	0	0	0	0	0	0	0	0	0	0	0	0	0	0	0	0	0	0	0	0	0	0	0	0	0	0	0	0	0	0	0	0	0	0	0	0	0	0
aRSV344	Actinobacteria	Actinobacteria	Propionibacteriales	Propionibacteriaceae	Aestuariimicrobium	0	0	0	0	0	0	0	0	0	0	0	0	0	0	0	0	0	0	0	0	0	0	0	0	0	0	0	0	0	0	0	0	0	0	0	0	0	0	0	0	0	21	0	0
aRSV345	Bacteroidetes	Flavobacteriia	Flavobacteriales	Flavobacteriaceae	Capnocytophaga	0	0	0	0	0	0	0	0	0	0	0	0	0	0	0	0	0	0	0	0	0	0	0	0	0	0	0	0	0	0	0	0	4	16	0	0	0	0	0	0	0	0	0	0
aRSV346	Firmicutes	Clostridia	Clostridiales	Christensenellaceae	Catabacter	0	0	0	0	0	0	0	0	0	0	0	0	0	0	0	0	0	0	0	0	0	0	0	0	0	0	0	0	0	0	0	0	0	0	0	0	0	0	0	0	0	0	0	0
aRSV347	Tenericutes	Mollicutes	Mollicutes_RF9	NA	NA	0	0	0	0	0	0	6	0	0	0	0	0	0	0	0	0	0	0	0	0	0	0	0	0	0	0	0	0	0	0	0	0	0	0	0	0	0	0	0	0	7	0	0	0
aRSV348	Bacteroidetes	Flavobacteriia	Flavobacteriales	Flavobacteriaceae	Bergeyella	0	0	0	0	0	0	0	0	0	0	0	0	0	0	0	0	0	0	0	0	0	0	0	0	0	0	0	0	0	0	23	0	0	11	0	0	0	0	0	0	0	0	0	0
aRSV349	Firmicutes	Clostridia	Clostridiales	Lachnospiraceae	NA	0	0	8	0	0	0	0	0	0	0	0	0	0	0	0	0	0	0	0	0	0	0	0	0	0	0	0	0	0	0	0	0	0	0	0	0	0	0	0	0	0	0	0	0
aRSV350	Firmicutes	Erysipelotrichia	Erysipelotrichales	Erysipelotrichaceae	Erysipelotrichaceae_UCG-004	0	0	0	0	0	0	0	0	5	0	0	0	0	0	0	0	0	0	0	0	0	0	0	0	0	0	0	0	0	0	0	0	0	0	0	0	0	0	0	0	0	0	0	0
aRSV351	Bacteroidetes	Bacteroidia	Bacteroidales	Bacteroidaceae	Bacteroides	0	0	0	0	0	0	0	0	0	0	0	0	0	0	0	0	0	0	0	0	0	0	0	0	0	0	0	0	0	0	0	0	0	0	0	0	0	0	0	0	0	0	0	0
aRSV352	Proteobacteria	Alphaproteobacteria	Caulobacterales	Caulobacteraceae	Brevundimonas	0	0	8	0	0	0	0	0	0	0	0	0	0	2	0	0	0	0	0	0	0	0	0	5	0	0	0	0	0	0	0	0	0	0	0	0	0	0	0	0	0	0	0	0
aRSV353	Bacteroidetes	Bacteroidia	Bacteroidales	Prevotellaceae	Prevotella_2	0	0	0	0	0	0	0	0	0	0	0	0	0	0	0	0	0	0	0	2	0	0	2	0	0	0	0	0	0	0	0	0	0	2	0	0	0	0	0	0	0	0	0	0
aRSV354	Proteobacteria	Gammaproteobacteria	Pseudomonadales	Pseudomonadaceae	Pseudomonas	0	0	0	0	0	0	0	0	0	0	0	0	0	0	0	0	0	0	0	0	0	0	0	0	0	0	0	0	0	0	0	0	0	0	0	2	0	0	0	0	0	0	0	0
aRSV355	Actinobacteria	Actinobacteria	Actinomycetales	Actinomycetaceae	Actinomyces	0	0	0	0	0	0	0	0	0	0	0	0	0	0	0	0	0	0	0	0	0	0	0	0	0	0	0	0	0	0	0	0	0	0	3	0	0	0	0	0	0	0	0	0
aRSV356	Bacteroidetes	Flavobacteriia	Flavobacteriales	Flavobacteriaceae	Elizabethkingia	0	0	6	0	0	0	0	0	0	0	0	0	0	0	0	0	0	0	0	0	0	0	0	0	0	0	0	0	0	0	0	0	0	0	0	0	0	0	0	0	0	0	0	0
aRSV357	Bacteroidetes	Bacteroidia	Bacteroidales	Prevotellaceae	Prevotella_2	0	0	0	0	0	0	0	0	0	0	0	0	6	0	0	0	0	0	0	0	0	0	0	0	0	0	0	0	0	0	0	0	0	0	0	0	0	0	0	0	0	0	0	0
aRSV358	Bacteroidetes	Bacteroidia	Bacteroidales	Prevotellaceae	Prevotella_7	0	0	0	0	0	0	0	0	0	0	0	0	0	0	0	0	0	0	0	0	0	0	0	0	0	0	0	0	0	0	0	0	0	0	0	0	0	0	0	0	0	0	0	0
aRSV359	Cyanobacteria	Chloroplast	NA	NA	NA	0	0	0	0	0	0	0	0	0	0	0	0	0	0	0	0	0	0	0	0	0	3	0	0	0	0	0	0	0	0	0	0	0	0	0	0	0	0	0	0	0	0	0	0
aRSV360	Bacteroidetes	Bacteroidia	Bacteroidales	Prevotellaceae	Prevotella_2	0	0	0	0	0	0	0	0	0	0	0	0	0	0	0	0	0	0	0	0	0	0	0	0	0	0	0	0	0	0	0	0	0	0	0	0	0	0	0	0	0	0	0	0
[truncated: 135 more columns]
