# Supplementary material for: Do we treat our patients or rather periodontal microbes with adjunctive antibiotics in periodontal therapy? A 16S rDNA microbial community analysis
Source: PLoS One. 2018 Apr 18;13(4):e0195534. doi: 10.1371/journal.pone.0195534 (PMC5906003; doi:10.1371/journal.pone.0195534)
Supplement: S2 Table — (XLSX) [file pone.0195534.s002.xlsx]

## Sheet: S2 Table
Sample-ID	Patient-ID	Treatment Time Point	Treatment Group	ENA Accession No.
002-V02	2	before	Placebo	ERS2030611
002-V04	2	after	Placebo	ERS2034987
003-V02	3	before	Placebo	ERS2034988
003-V04	3	after	Placebo	ERS2034989
006-V02	6	before	Antibiotic	ERS2034990
006-V04	6	after	Antibiotic	ERS2034991
010-V02	10	before	Antibiotic	ERS2034992
010-V04	10	after	Antibiotic	ERS2034993
017-V02	17	before	Placebo	ERS2034994
017-V04	17	after	Placebo	ERS2034995
020-V02	20	before	Placebo	ERS2034996
020-V04	20	after	Placebo	ERS2034997
021-V02	21	before	Antibiotic	ERS2034998
021-V04	21	after	Antibiotic	ERS2034999
026-V02	26	before	Placebo	ERS2035000
026-V04	26	after	Placebo	ERS2035001
037-V02	37	before	Antibiotic	ERS2035002
037-V04	37	after	Antibiotic	ERS2035003
043-V02	43	before	Placebo	ERS2035004
043-V04	43	after	Placebo	ERS2035005
044-V02	44	before	Placebo	ERS2035006
044-V04	44	after	Placebo	ERS2035007
045-V02	45	before	Placebo	ERS2035008
045-V04	45	after	Placebo	ERS2035009
050-V02	50	before	Placebo	ERS2035010
050-V04	50	after	Placebo	ERS2035011
054-V02	54	before	Placebo	ERS2035012
054-V04	54	after	Placebo	ERS2035013
056-V02	56	before	Antibiotic	ERS2035014
056-V04	56	after	Antibiotic	ERS2035015
058-V02	58	before	Placebo	ERS2035016
058-V04	58	after	Placebo	ERS2035017
064-V02	64	before	Placebo	ERS2035018
064-V04	64	after	Placebo	ERS2035019
076-V02	76	before	Placebo	ERS2035020
076-V04	76	after	Placebo	ERS2035021
077-V02	77	before	Antibiotic	ERS2035022
077-V04	77	after	Antibiotic	ERS2035023
086-V02	86	before	Placebo	ERS2035024
086-V04	86	after	Placebo	ERS2035025
089-V02	89	before	Antibiotic	ERS2035026
089-V04	89	after	Antibiotic	ERS2035027
091-V02	91	before	Placebo	ERS2035028
091-V04	91	after	Placebo	ERS2035029
092-V02	92	before	Antibiotic	ERS2035030
092-V04	92	after	Antibiotic	ERS2035031
094-V02	94	before	Antibiotic	ERS2035032
094-V04	94	after	Antibiotic	ERS2035033
095-V02	95	before	Antibiotic	ERS2035034
095-V04	95	after	Antibiotic	ERS2035035
096-V02	96	before	Placebo	ERS2035036
096-V04	96	after	Placebo	ERS2035037
099-V02	99	before	Placebo	ERS2035038
099-V04	99	after	Placebo	ERS2035039
109-V02	109	before	Antibiotic	ERS2035040
109-V04	109	after	Antibiotic	ERS2035041
114-V02	114	before	Placebo	ERS2035042
114-V04	114	after	Placebo	ERS2035043
118-V02	118	before	Placebo	ERS2035044
118-V04	118	after	Placebo	ERS2035045
120-V02	120	before	Antibiotic	ERS2035046
120-V04	120	after	Antibiotic	ERS2035047
121-V02	121	before	Antibiotic	ERS2035048
121-V04	121	after	Antibiotic	ERS2035049
123-V02	123	before	Placebo	ERS2035050
123-V04	123	after	Placebo	ERS2035051
126-V02	126	before	Antibiotic	ERS2035052
126-V04	126	after	Antibiotic	ERS2035053
128-V02	128	before	Antibiotic	ERS2035054
128-V04	128	after	Antibiotic	ERS2035055
130-V02	130	before	Placebo	ERS2035056
130-V04	130	after	Placebo	ERS2035057
131-V02	131	before	Placebo	ERS2035058
131-V04	131	after	Placebo	ERS2035059
135-V02	135	before	Placebo	ERS2035060
135-V04	135	after	Placebo	ERS2035061
136-V02	136	before	Antibiotic	ERS2035062
136-V04	136	after	Antibiotic	ERS2035063
141-V02	141	before	Antibiotic	ERS2035064
141-V04	141	after	Antibiotic	ERS2035065
143-V02	143	before	Placebo	ERS2035066
143-V04	143	after	Placebo	ERS2035067
144-V02	144	before	Antibiotic	ERS2035068
144-V04	144	after	Antibiotic	ERS2035069
145-V02	145	before	Antibiotic	ERS2035070
145-V04	145	after	Antibiotic	ERS2035071
147-V02	147	before	Antibiotic	ERS2035072
147-V04	147	after	Antibiotic	ERS2035073
158-V02	158	before	Placebo	ERS2035074
158-V04	158	after	Placebo	ERS2035075
162-V02	162	before	Antibiotic	ERS2035076
162-V04	162	after	Antibiotic	ERS2035077
166-V02	166	before	Antibiotic	ERS2035078
166-V04	166	after	Antibiotic	ERS2035079
169-V02	169	before	Placebo	ERS2035080
169-V04	169	after	Placebo	ERS2035081
171-V02	171	before	Antibiotic	ERS2035082
171-V04	171	after	Antibiotic	ERS2035083
173-V02	173	before	Antibiotic	ERS2035084
173-V04	173	after	Antibiotic	ERS2035085
184-V02	184	before	Placebo	ERS2035086
184-V04	184	after	Placebo	ERS2035087
186-V02	186	before	Placebo	ERS2035088
186-V04	186	after	Placebo	ERS2035089
194-V02	194	before	Antibiotic	ERS2035090
194-V04	194	after	Antibiotic	ERS2035091
196-V02	196	before	Antibiotic	ERS2035092
196-V04	196	after	Antibiotic	ERS2035093
203-V02	203	before	Placebo	ERS2035094
203-V04	203	after	Placebo	ERS2035095
206-V02	206	before	Antibiotic	ERS2035096
206-V04	206	after	Antibiotic	ERS2035097
209-V02	209	before	Placebo	ERS2035098
209-V04	209	after	Placebo	ERS2035099
217-V02	217	before	Antibiotic	ERS2035100
217-V04	217	after	Antibiotic	ERS2035101
219-V02	219	before	Placebo	ERS2035102
219-V04	219	after	Placebo	ERS2035103
229-V02	229	before	Placebo	ERS2035104
229-V04	229	after	Placebo	ERS2035105
234-V02	234	before	Antibiotic	ERS2035106
234-V04	234	after	Antibiotic	ERS2035107
235-V02	235	before	Antibiotic	ERS2035108
235-V04	235	after	Antibiotic	ERS2035109
236-V02	236	before	Antibiotic	ERS2035110
236-V04	236	after	Antibiotic	ERS2035111
242-V02	242	before	Placebo	ERS2035112
242-V04	242	after	Placebo	ERS2035113
244-V02	244	before	Placebo	ERS2035114
244-V04	244	after	Placebo	ERS2035115
249-V02	249	before	Antibiotic	ERS2035116
249-V04	249	after	Antibiotic	ERS2035117
250-V02	250	before	Antibiotic	ERS2035118
250-V04	250	after	Antibiotic	ERS2035119
254-V02	254	before	Antibiotic	ERS2035120
254-V04	254	after	Antibiotic	ERS2035121
268-V02	268	before	Placebo	ERS2035122
268-V04	268	after	Placebo	ERS2035123
269-V02	269	before	Placebo	ERS2035124
269-V04	269	after	Placebo	ERS2035125
280-V02	280	before	Placebo	ERS2035126
280-V04	280	after	Placebo	ERS2035127
281-V02	281	before	Placebo	ERS2035128
281-V04	281	after	Placebo	ERS2035129
282-V02	282	before	Antibiotic	ERS2035130
282-V04	282	after	Antibiotic	ERS2035131
286-V02	286	before	Placebo	ERS2035132
286-V04	286	after	Placebo	ERS2035133
290-V02	290	before	Antibiotic	ERS2035134
290-V04	290	after	Antibiotic	ERS2035135
294-V02	294	before	Antibiotic	ERS2035136
294-V04	294	after	Antibiotic	ERS2035137
298-V02	298	before	Antibiotic	ERS2035138
298-V04	298	after	Antibiotic	ERS2035139
303-V02	303	before	Antibiotic	ERS2035140
303-V04	303	after	Antibiotic	ERS2035141
305-V02	305	before	Antibiotic	ERS2035142
305-V04	305	after	Antibiotic	ERS2035143
307-V02	307	before	Placebo	ERS2035144
307-V04	307	after	Placebo	ERS2035145
309-V02	309	before	Placebo	ERS2035146
309-V04	309	after	Placebo	ERS2035147
317-V02	317	before	Placebo	ERS2035148
317-V04	317	after	Placebo	ERS2035149
318-V02	318	before	Placebo	ERS2035150
318-V04	318	after	Placebo	ERS2035151
320-V02	320	before	Placebo	ERS2035152
320-V04	320	after	Placebo	ERS2035153
321-V02	321	before	Placebo	ERS2035154
321-V04	321	after	Placebo	ERS2035155
323-V02	323	before	Antibiotic	ERS2035156
323-V04	323	after	Antibiotic	ERS2035157
330-V02	330	before	Placebo	ERS2035158
330-V04	330	after	Placebo	ERS2035159
333-V02	333	before	Placebo	ERS2035160
333-V04	333	after	Placebo	ERS2035161
336-V02	336	before	Antibiotic	ERS2035162
336-V04	336	after	Antibiotic	ERS2035163
