# Supplementary material for: Do we treat our patients or rather periodontal microbes with adjunctive antibiotics in periodontal therapy? A 16S rDNA microbial community analysis
Source: PLoS One. 2018 Apr 18;13(4):e0195534. doi: 10.1371/journal.pone.0195534 (PMC5906003; doi:10.1371/journal.pone.0195534)
Supplement: S3 Table — MRRC variables are shown as mean percentages of aRSVs per sample for the respective treatment group and time point. Adjusted p-values (according to Benjamini-Hochberg) are derived from a negative binomial regression model comparing aRSV abundances before and after treatment within each group. Noticeable adjusted p-values (padj <0.05) are shown in bold. Taxonomic classifications are colored according to the Soccransky et al. complex affiliation. For each treatment group (Antibiotic or Placebo group) a separate sheet is used in the file. Unclassified = no taxonomic classification at this level possible; NA = not available, padj filtered out due to default independent filtering of DESeq2. (XLSX) [file pone.0195534.s003.xlsx]

## Sheet: Antibiotic Group
aRSV-ID	log2FoldChange	lfcSE	p-value	padj	MRRCb (before/both groups)	MRRC (before/antibiotic)	MRRC (after/antibiotic)	Phylum	Genus
aRSV1	-5.51721	0.898991	8.40327e-10	1.05975e-08	0.0951921	0.104416	0.00325306	Bacteroidetes	Porphyromonas
aRSV2	-0.620589	0.238039	0.00913162	0.0218198	0.164455	0.152729	0.13897	Fusobacteria	Fusobacterium
aRSV3	-4.75347	0.635139	7.20221e-14	1.11611e-12	0.050782	0.0556636	0.0029503	Bacteroidetes	Tannerella
aRSV4	1.55655	0.316117	8.48023e-07	6.01566e-06	0.0279406	0.0257531	0.077408	Firmicutes	Streptococcus
aRSV5	0.991877	0.629909	0.11534	0.184638	0.0173267	0.0193569	0.0460695	Bacteroidetes	Prevotella
aRSV6	1.8765	0.417677	7.03236e-06	3.89353e-05	0.0243544	0.0212759	0.0778472	Firmicutes	Veillonella
aRSV7	-3.60585	0.747955	1.42876e-06	9.82817e-06	0.0239247	0.0264313	0.00288574	Firmicutes	Filifactor
aRSV8	-1.18225	0.424134	0.00531248	0.0140225	0.0159196	0.0163981	0.00891864	Proteobacteria	Campylobacter
aRSV9	-3.79763	0.657909	7.82104e-09	7.10151e-08	0.0216049	0.025216	0.00300861	Spirochaetae	Treponema
aRSV10	-3.07471	0.669567	4.38823e-06	2.76702e-05	0.0175395	0.0171337	0.00308885	Bacteroidetes	unclassified
aRSV11	-3.32602	0.570843	5.65986e-09	5.35328e-08	0.0122084	0.0131684	0.00154074	Synergistetes	Fretibacterium
aRSV12	-1.15056	0.44997	0.0105589	0.0244579	0.0113872	0.0129657	0.00724625	Firmicutes	Parvimonas
aRSV13	-5.53084	2.04862	0.00693843	0.0171392	0.0152481	0.0271359	0.00053055	Fusobacteria	Oceanivirga
aRSV14	-4.72411	0.662797	1.0218e-12	1.44968e-11	0.0332717	0.0347694	0.00160695	Synergistetes	Fretibacterium
aRSV15	1.9199	0.679954	0.00474907	0.0126828	0.00712057	0.00538846	0.0234187	Proteobacteria	Neisseria
aRSV16	0.116716	0.706649	0.868812	0.913057	0.00506217	0.00493016	0.00740355	Firmicutes	Peptostreptococcus
aRSV17	-1.71679	0.630485	0.00646985	0.0165018	0.0232622	0.0221108	0.00805152	Bacteroidetes	Porphyromonas
aRSV18	2.41078	0.516508	3.04961e-06	1.97789e-05	0.00494082	0.00490597	0.0207129	Actinobacteria	Rothia
aRSV19	1.8229	0.527775	0.000552474	0.00192941	0.00951841	0.0128804	0.0335957	Proteobacteria	Haemophilus
aRSV20	-2.68019	0.585288	4.66598e-06	2.86264e-05	0.00694287	0.00738356	0.00164429	Firmicutes	unclassified
aRSV21	-3.80756	0.63071	1.57071e-09	1.78275e-08	0.00699595	0.00794622	0.000759738	Firmicutes	unclassified
aRSV22	0.476834	0.535383	0.373121	0.481242	0.00483753	0.00501012	0.00906521	Firmicutes	Dialister
aRSV23	-3.97251	1.01915	9.70512e-05	0.000393404	0.0156269	0.0153331	0.00142705	Spirochaetae	Treponema
aRSV24	-3.49152	0.954785	0.000255319	0.000982328	0.0230675	0.0244823	0.00380563	Bacteroidetes	Prevotella
aRSV25	0.654903	0.741225	0.376944	0.481542	0.00415157	0.00363937	0.00837521	Firmicutes	Anaeroglobus
aRSV26	2.93144	0.643716	5.26523e-06	3.14528e-05	0.00219923	0.00132486	0.0200022	Proteobacteria	Lautropia
aRSV27	-1.62153	0.710564	0.0224873	0.0481568	0.00544572	0.00638583	0.00288689	Firmicutes	Dialister
aRSV28	1.12663	0.7135	0.114331	0.184638	0.009194	0.00905186	0.0269927	Bacteroidetes	Alloprevotella
aRSV29	-6.25667	0.750286	7.48887e-17	1.30767e-15	0.00707328	0.00664285	0.00011209	Proteobacteria	Desulfobulbus
aRSV30	-1.8338	0.980852	0.0615392	0.10829	0.00357397	0.00244513	0.000721648	Saccharibacteria	unclassified
aRSV31	0.474252	0.807269	0.556884	0.644962	0.0026339	0.00191764	0.00852618	Proteobacteria	Neisseria
aRSV32	-1.04202	0.565712	0.0654808	0.113467	0.00900885	0.0120826	0.00711633	Firmicutes	Streptococcus
aRSV33	-3.51989	0.814357	1.54414e-05	7.96636e-05	0.00560308	0.00508071	0.000587322	Spirochaetae	Treponema
aRSV34	0.654433	0.809827	0.419025	0.516949	0.00327917	0.00213952	0.00359093	Saccharibacteria	unclassified
aRSV35	-4.77807	1.07595	8.9632e-06	4.8444e-05	0.00539173	0.00700476	0.000322777	Firmicutes	unclassified
aRSV36	0.431265	0.421795	0.306567	0.406963	0.00557773	0.00442392	0.00714521	Proteobacteria	Campylobacter
aRSV37	2.36131	0.539651	1.21085e-05	6.39214e-05	0.00159716	0.00156711	0.0076239	Firmicutes	Granulicatella
aRSV38	-0.0965976	0.974185	0.921013	0.942484	0.00185284	0.00198308	0.00418676	Saccharibacteria	unclassified
aRSV39	-2.31354	0.568845	4.76064e-05	0.000214661	0.0242123	0.0249774	0.00715495	Spirochaetae	Treponema
aRSV40	1.54178	0.616869	0.0124416	0.0282424	0.00177919	0.00132551	0.00577476	Firmicutes	Oribacterium
aRSV41	0.243408	0.46247	0.598665	0.676104	0.0137881	0.0118096	0.0186146	Firmicutes	Selenomonas
aRSV42	1.19386	0.566546	0.0350953	0.0663887	0.00729756	0.00603699	0.0198169	Bacteroidetes	Prevotella
aRSV43	-0.98436	0.913639	0.281299	0.380102	0.00607566	0.00642537	0.00487693	Bacteroidetes	unclassified
aRSV44	0.900531	0.610059	0.139907	0.211726	0.00469723	0.00419825	0.0113424	Fusobacteria	Leptotrichia
aRSV45	2.97893	0.920367	0.00120931	0.00366017	0.0021089	0.00139079	0.0128342	Fusobacteria	Leptotrichia
aRSV46	-7.94316	2.58537	0.00212377	0.00618071	0.00181836	0.00376943	0.00199285	Synergistetes	Pyramidobacter
aRSV47	0.273612	0.956794	0.774903	0.821976	0.00235896	0.00250005	0.00161747	Bacteroidetes	Prevotella
aRSV48	2.4301	0.492204	7.92588e-07	5.82148e-06	0.00681403	0.00333824	0.0211482	Bacteroidetes	Capnocytophaga
aRSV49	-1.47268	0.377273	9.48183e-05	0.000391341	0.00854263	0.00848171	0.00428216	Spirochaetae	Treponema
aRSV50	-7.32257	1.22853	2.51563e-09	2.59567e-08	0.00433656	0.00467404	0.000409348	Bacteroidetes	Prevotella
aRSV51	2.12433	0.983817	0.0308292	0.0603295	0.00196895	0.00116655	0.00636163	Fusobacteria	Leptotrichia
aRSV52	0.564801	0.462342	0.221856	0.312803	0.00492736	0.00422585	0.00879378	Firmicutes	Gemella
aRSV53	-2.85573	0.767777	0.000199634	0.000781325	0.00330791	0.00335472	0.000532483	Bacteroidetes	Phocaeicola
aRSV54	-0.695132	0.51959	0.180946	0.268385	0.00351186	0.00323941	0.00281945	Firmicutes	Catonella
aRSV55	-5.31509	0.710478	7.3752e-14	1.11611e-12	0.00406121	0.00359855	0.000106797	Firmicutes	Defluviitaleaceae_UCG-011
aRSV56	2.76677	0.954295	0.00374019	0.0102292	0.00110812	0.00113154	0.00904407	Bacteroidetes	Porphyromonas
aRSV57	1.31893	0.584832	0.0241189	0.0497727	0.00215027	0.00127503	0.00340989	Bacteroidetes	Tannerella
aRSV58	1.85638	0.720799	0.0100112	0.0235572	0.0011644	0.00166813	0.00498016	Proteobacteria	Kingella
aRSV59	-1.14051	1.18965	0.337712	0.445701	0.00208093	0.00133502	0.000497461	Fusobacteria	Leptotrichia
aRSV60	2.18914	0.553765	7.71133e-05	0.000330278	0.00506168	0.00388414	0.0179605	Bacteroidetes	Capnocytophaga
aRSV61	-0.120501	0.923274	0.896159	0.928896	0.00269124	0.00223778	0.0028952	Saccharibacteria	unclassified
aRSV62	-5.73681	0.967816	3.07426e-09	3.03416e-08	0.00345419	0.00381624	0.000107113	Tenericutes	Mycoplasma
aRSV63	-6.44327	1.57521	4.30601e-05	0.000203639	0.00553016	0.00621971	6.51979e-05	Firmicutes	unclassified
aRSV64	1.20588	1.08632	0.266972	0.365076	0.000843535	0.000311441	0.000961158	Firmicutes	Ruminococcaceae_UCG-014
aRSV65	0.421894	0.891493	0.636039	0.691836	0.00419572	0.00339073	0.00541378	Fusobacteria	Leptotrichia
aRSV66	-2.43842	0.540121	6.34447e-06	3.69281e-05	0.00655683	0.00670078	0.0018075	Spirochaetae	Treponema
aRSV67	1.97976	0.931405	0.0335393	0.0645205	0.00119589	0.000855758	0.00364957	Bacteroidetes	Capnocytophaga
aRSV68	-3.63894	1.65746	0.0281288	0.0568065	0.00314303	0.00358964	0.000380873	Bacteroidetes	unclassified
aRSV69	1.01897	0.529324	0.0542239	0.0961626	0.00546727	0.00574362	0.0151493	Firmicutes	unclassified
aRSV70	1.39327	1.04412	0.182076	0.268385	0.00151648	0.00182411	0.00489872	Proteobacteria	Neisseria
aRSV71	-3.36474	0.838317	5.97772e-05	0.000260951	0.0018065	0.00238027	0.000324482	Firmicutes	Pseudoramibacter
aRSV72	2.4426	0.732843	0.000859005	0.0028835	0.00297858	0.00139107	0.00970635	Bacteroidetes	Capnocytophaga
aRSV73	1.46918	0.918057	0.10953	0.178872	0.00375807	0.00314921	0.00848327	Bacteroidetes	Prevotella
aRSV74	-8.77612	2.46397	0.000368352	0.00134865	0.00307791	0.00199795	1.2404e-05	Bacteroidetes	Odoribacter
aRSV75	0.18561	1.51371	0.902409	0.931122	0.000664904	0.000811401	0.00335752	Proteobacteria	Aggregatibacter
aRSV76	0.491538	0.708278	0.487689	0.579609	0.00440134	0.00349661	0.00615235	Proteobacteria	unclassified
aRSV77	1.82412	0.872557	0.036569	0.0682877	0.00119042	0.00113609	0.00453615	Proteobacteria	unclassified
aRSV78	1.32879	0.613669	0.030363	0.0599339	0.000873033	0.000840974	0.00271675	Firmicutes	Solobacterium
aRSV79	2.01682	0.803159	0.0120353	0.027596	0.00111342	0.00108612	0.00794924	Actinobacteria	Actinomyces
aRSV80	1.03085	0.776133	0.184118	0.269644	0.00332451	0.00250204	0.00425587	Saccharibacteria	unclassified
aRSV81	-4.22066	0.805893	1.62991e-07	1.32139e-06	0.00233694	0.00266105	0.000214395	Chloroflexi	unclassified
aRSV82	-4.35428	0.882042	7.95003e-07	5.82148e-06	0.00161555	0.00209771	0.000187002	Bacteroidetes	Prevotella
aRSV83	2.23691	0.574777	9.95054e-05	0.000396276	0.00184003	0.00132971	0.00791899	Firmicutes	Lachnoanaerobaculum
aRSV84	-6.29684	1.50452	2.84797e-05	0.000137551	0.00300202	0.00408101	6.39856e-05	Firmicutes	Parvimonas
aRSV85	-0.388757	0.801475	0.627639	0.688407	0.00311206	0.00249407	0.00477164	Bacteroidetes	Prevotella
aRSV86	2.97844	0.709556	2.69742e-05	0.000133112	0.00247685	0.000821015	0.00713605	Fusobacteria	Leptotrichia
aRSV87	-2.39289	0.718262	0.000863779	0.0028835	0.00332536	0.00389546	0.0010232	Firmicutes	Peptococcus
aRSV88	0.669015	0.89497	0.454745	0.552017	0.00315098	0.00207378	0.00467453	Bacteroidetes	Porphyromonas
aRSV89	4.08801	1.47946	0.00572423	0.0149356	0.00023931	0.000142273	0.00322455	Proteobacteria	Neisseria
aRSV90	5.83627	1.36149	1.81352e-05	9.14819e-05	0.000713751	0.000400655	0.00244268	Firmicutes	Selenomonas
aRSV91	-4.69935	0.755225	4.89439e-10	6.53545e-09	0.00284542	0.00317682	0.000184237	Firmicutes	unclassified
aRSV92	0.388325	0.962692	0.686673	0.735258	0.00106586	0.000821917	0.00185126	Firmicutes	unclassified
aRSV93	0.342076	0.724845	0.636977	0.691836	0.00348729	0.00268493	0.003843	Bacteroidetes	Prevotella
aRSV94	1.36773	0.597014	0.0219667	0.0474899	0.00258813	0.00211265	0.00814854	Firmicutes	unclassified
aRSV95	2.18214	1.08922	0.0451345	0.0813137	0.000373983	0.000487212	0.00205948	Firmicutes	Streptococcus
aRSV96	-25.7976	1.86032	9.99803e-44	5.67388e-42	0.000946947	0.000726003	6.48682e-05	Proteobacteria	Desulfovibrio
aRSV97	2.90609	1.08464	0.00737728	0.0178153	0.000412223	0.000322967	0.00224543	Firmicutes	Abiotrophia
aRSV98	2.56033	0.569524	6.93885e-06	3.89353e-05	0.000776884	0.000430608	0.00279955	Bacteroidetes	Bergeyella
aRSV99	-2.16661	0.957135	0.0235963	0.049141	0.00178266	0.00191844	0.000558497	Bacteroidetes	Rikenellaceae_RC9_gut_group
aRSV100	0.729267	0.843904	0.387501	0.491412	0.00368353	0.00211684	0.00400892	Firmicutes	Selenomonas
aRSV101	2.19943	0.73323	0.00270295	0.00757494	0.00282807	0.00158539	0.00939234	Bacteroidetes	Prevotella
aRSV102	-0.322714	1.3538	0.811589	0.856887	0.000687695	0.000732416	0.000823795	Firmicutes	unclassified
aRSV103	0.985913	0.478927	0.0395337	0.0729605	0.002089	0.00195401	0.00500535	Proteobacteria	unclassified
aRSV104	3.18797	0.968355	0.000994253	0.00317881	0.000437351	0.00031074	0.00304607	Firmicutes	Selenomonas
aRSV105	-5.72057	1.1984	1.81055e-06	1.20881e-05	0.00200461	0.00280997	6.29917e-05	Firmicutes	Butyrivibrio_2
aRSV106	-6.22803	1.08061	8.24043e-09	7.19453e-08	0.00149415	0.00174682	2.54116e-05	Firmicutes	Johnsonella
aRSV107	0.546741	1.17785	0.642514	0.694527	0.000794267	0.000302207	0.00155919	Fusobacteria	Leptotrichia
aRSV108	0.505245	1.02718	0.622807	0.688407	0.000508513	0.000646452	0.00108822	Bacteroidetes	Prevotella
aRSV109	-1.22228	0.816299	0.134305	0.205994	0.00175419	0.0017497	0.00101447	Firmicutes	Selenomonas
aRSV110	0.953525	0.885037	0.281309	0.380102	0.000687413	0.000533357	0.00126227	Firmicutes	unclassified
aRSV111	-0.662517	0.714558	0.353838	0.461616	0.00203225	0.00175665	0.00106552	Firmicutes	Selenomonas
aRSV112	2.02709	1.25378	0.105925	0.175511	0.000298287	0.000379182	0.00180163	Firmicutes	Selenomonas
aRSV113	-2.76724	0.708565	9.4065e-05	0.000391341	0.000910405	0.000981643	0.000216819	Spirochaetae	Treponema
aRSV114	1.61701	0.712216	0.0231836	0.0487284	0.00159749	0.00119597	0.00422751	Actinobacteria	Atopobium
aRSV115	-5.42695	0.90107	1.71434e-09	1.85312e-08	0.00200881	0.00178713	5.59616e-05	Firmicutes	Selenomonas
aRSV116	-26.1564	1.54854	5.23292e-64	5.93937e-62	0.00117848	0.000915476	0	Spirochaetae	Treponema
aRSV117	2.76407	1.32311	0.0367009	0.0682877	0.000857532	0.000302858	0.00247129	Bacteroidetes	Prevotella
aRSV118	0.910348	0.795584	0.252519	0.351668	0.00221681	0.00191273	0.00437399	Actinobacteria	Corynebacterium
aRSV119	-3.65028	1.11439	0.00105443	0.00332437	0.00107226	0.000627553	0.000243951	Proteobacteria	Eikenella
aRSV120	1.41553	0.646376	0.0285284	0.0568065	0.0011945	0.00126585	0.0044868	Proteobacteria	Campylobacter
aRSV121	-0.500804	0.915279	0.584269	0.663145	0.000646141	0.000465253	0.000452416	Tenericutes	Mycoplasma
aRSV122	2.85535	1.04041	0.00606159	0.0156361	0.000810078	0.000359507	0.00289951	Firmicutes	Megasphaera
aRSV123	-4.64939	1.14403	4.82277e-05	0.000214661	0.000917093	0.000954806	4.35406e-05	Firmicutes	Catonella
aRSV124	-2.04959	1.60073	0.200401	0.286107	0.000420255	0.000317125	0.000100801	Saccharibacteria	unclassified
aRSV125	4.37121	1.07384	4.68861e-05	0.000214661	0.000297631	0.000156052	0.00336959	Bacteroidetes	Prevotella
aRSV126	0.360215	0.730472	0.621924	0.688407	0.00127203	0.00104408	0.00156781	Proteobacteria	Cardiobacterium
aRSV127	3.29889	0.957161	0.00056782	0.00195295	0.000163111	0.000124462	0.00175731	Firmicutes	Stomatobaculum
aRSV128	0.601629	1.07516	0.57577	0.657917	0.000785587	0.000612007	0.00111674	SR1_(Absconditabacteria)	unclassified
aRSV129	-25.3429	2.40382	5.48568e-26	1.38361e-24	0.00120821	0.00127606	0.000573706	Proteobacteria	Aggregatibacter
aRSV130	-3.00066	1.03016	0.00358181	0.00991549	0.00306522	0.00405917	0.000636831	Bacteroidetes	Prevotella
aRSV131	-4.76931	1.35241	0.000421064	0.00151717	0.00189323	0.00158213	9.04332e-05	Spirochaetae	Treponema
aRSV132	1.12198	1.09271	0.304521	0.406626	0.000382545	0.000359581	0.000959761	Bacteroidetes	Capnocytophaga
aRSV133	-0.000401984	1.84447	0.999826	0.999826	0.000429765	0.00041954	0.000349203	Bacteroidetes	Alloprevotella
aRSV134	2.26528	0.70342	0.00128022	0.0038238	0.000539764	0.000640664	0.00334446	Actinobacteria	Actinomyces
aRSV135	0.963972	1.23604	0.435456	0.531443	0.000788353	0.000944025	0.00201024	Firmicutes	Selenomonas
aRSV136	0.97865	1.33747	0.46434	0.5577	0.000318399	0.000145675	0.000294959	Bacteroidetes	Prevotella
aRSV137	1.90016	1.43796	0.186357	0.271174	0.000422884	0.000158529	0.00134815	Fusobacteria	Leptotrichia
aRSV138	1.71532	1.10473	0.120493	0.189945	0.000403343	0.000417721	0.00124881	Proteobacteria	Cardiobacterium
aRSV139	-5.17384	0.935432	3.18477e-08	2.67757e-07	0.000963985	0.001258	3.8475e-05	Firmicutes	Moryella
aRSV140	-3.14203	0.872324	0.000315891	0.00117553	0.00125941	0.00152544	0.000291133	Firmicutes	unclassified
aRSV141	-0.827524	2.45179	0.735726	NA	0.000384183	0.000573787	0.000320853	Firmicutes	Streptococcus
aRSV142	-2.25979	0.947775	0.0171113	0.0377113	0.000490429	0.000612269	0.000162715	Firmicutes	Family_XIII_UCG-001
aRSV143	-7.28696	2.08712	0.000480507	0.0017043	0.0010335	0.00203317	1.83592e-05	Bacteroidetes	Bacteroides
aRSV144	-0.655612	1.26119	0.603178	0.677829	0.000482956	0.000375393	0.00025311	Actinobacteria	Olsenella
aRSV145	-25.6766	1.74372	4.4455e-49	3.36376e-47	0.00101883	0.000724957	0.000230594	Bacteroidetes	Prevotella
aRSV146	-5.04069	2.12734	0.017813	0.0388803	0.000498168	0.00069815	0	Spirochaetae	Sphaerochaeta
aRSV147	2.84099	1.82105	0.118741	0.188491	5.58586e-05	9.89329e-05	0.00128331	Actinobacteria	Scardovia
aRSV148	-2.20941	1.32018	0.094215	0.159603	0.000460937	0.000570004	0.00015702	Firmicutes	Bulleidia
aRSV149	4.03715	1.30467	0.00197213	0.00581393	0.000139832	2.26756e-05	0.0005046	Firmicutes	Ruminococcaceae_UCG-014
aRSV150	1.98106	2.1328	0.352966	0.461616	0.000185992	0.000145995	0.000530785	Proteobacteria	Haemophilus
aRSV151	-4.90958	4.21349	0.243936	NA	0.000893033	0.00167547	0	Tenericutes	Acholeplasma
aRSV152	2.78336	0.842714	0.000957061	0.00312404	0.000975604	0.000634627	0.00463149	Bacteroidetes	Prevotella
aRSV153	1.2836	0.987843	0.193809	0.280221	0.000685221	0.000884866	0.00205316	Actinobacteria	Rothia
aRSV154	2.17762	0.808357	0.00706244	0.0172384	0.000777285	0.000496013	0.0026032	Bacteroidetes	Prevotella
aRSV155	-4.17225	2.69797	0.121998	0.190196	0.000359492	0.000316427	0.000565739	Bacteroidetes	Porphyromonas
aRSV156	-5.15986	1.03203	5.7421e-07	4.49467e-06	0.000436071	0.000510088	2.31221e-05	Firmicutes	Family_XIII_UCG-001
aRSV157	-2.61167	1.2219	0.0325665	0.0631847	0.000853625	0.0011638	0.000203648	Tenericutes	unclassified
aRSV158	-24.2721	2.63595	3.31928e-20	6.27897e-19	0.000644041	0.000573634	0	Spirochaetae	Treponema
aRSV159	-24.2469	1.37647	1.88062e-69	4.269e-67	0.000205962	0.000195342	0	Firmicutes	Johnsonella
aRSV160	-6.14578	1.86179	0.000963359	0.00312404	0.000640622	0.000767613	0.000156167	Spirochaetae	Treponema
aRSV161	-1.9295	1.29852	0.137298	0.209173	0.000613429	0.000688297	0.000174421	Bacteroidetes	Rikenellaceae_RC9_gut_group
aRSV162	3.68765	1.49382	0.0135645	0.0301877	0.000217157	0.000159745	0.00277381	Firmicutes	Veillonella
aRSV163	-0.813221	1.98492	0.682027	0.733745	0.000503571	0.000284203	0.000693769	Firmicutes	unclassified
aRSV164	-3.44789	1.20225	0.00413235	0.0111672	0.000399126	0.000531404	0.000108413	Spirochaetae	Treponema
aRSV165	2.41856	2.7411	0.377597	0.481542	0.000596592	0.00106122	0.00051466	Firmicutes	Lactobacillus
aRSV166	0.857646	1.51333	0.570899	0.657838	0.000181291	0.000157707	0.000362393	Bacteroidetes	Prevotella
aRSV167	1.68793	0.943483	0.0736083	0.126584	0.000550793	0.000410897	0.00162001	Firmicutes	Johnsonella
aRSV168	4.85232	1.34416	0.000306269	0.00115872	0.00161005	4.20722e-05	0.00166153	Bacteroidetes	Prevotella
aRSV169	-2.03276	3.86723	0.599141	NA	0.000334609	0.000188465	0.000610676	Bacteroidetes	unclassified
aRSV170	-1.26615	1.95758	0.517767	0.605841	0.000260383	0.000299428	3.44868e-05	Saccharibacteria	Candidatus_Saccharimonas
aRSV171	-0.117802	1.45659	0.935541	0.948071	0.000122085	0.000137265	0.000340742	Bacteroidetes	Prevotella
aRSV172	2.09033	1.02924	0.0422606	0.0773642	0.000233629	0.000153077	0.000863831	Bacteroidetes	Prevotella
aRSV173	22.9309	2.25126	2.29388e-24	5.20711e-23	0.000354113	3.62235e-05	0.000300655	Saccharibacteria	unclassified
aRSV174	-22.1083	2.38372	1.78141e-20	3.67618e-19	0.000392805	0.000238862	0	Bacteroidetes	Bacteroides
aRSV175	-4.83263	2.12261	0.0228016	0.0483735	0.000478679	0.000443489	1.23943e-05	Bacteroidetes	Capnocytophaga
aRSV176	1.21329	2.00933	0.545956	0.635549	0.000138459	0.000145606	0.0004873	Proteobacteria	Actinobacillus
aRSV177	-2.74292	4.21859	0.515565	NA	0.000162318	0.000138107	0	Spirochaetae	Treponema
aRSV178	0	0	1	NA	2.00992e-06	0	0.00057553	Firmicutes	Lactobacillus
aRSV179	5.18812	1.91014	0.00660571	0.0166611	0.000114136	5.66484e-05	0.00048184	Firmicutes	Selenomonas
aRSV180	1.58774	1.02761	0.122329	0.190196	0.00013833	0.000113765	0.000743203	Actinobacteria	unclassified
aRSV181	1.75592	1.45553	0.22767	0.31902	0.00041472	0.000271359	0.000963554	Firmicutes	Shuttleworthia
aRSV182	4.38972	1.4455	0.00239096	0.00687023	0.0001734	4.62483e-05	0.00040119	Saccharibacteria	Candidatus_Saccharimonas
aRSV183	-1.03311	1.44334	0.47413	0.566461	0.000245113	0.000186527	0.000153373	Actinobacteria	unclassified
aRSV184	1.06971	1.3502	0.428211	0.525426	0.000324942	0.000127654	0.000299997	Firmicutes	Selenomonas
aRSV185	-7.50262	1.23909	1.40453e-09	1.67804e-08	0.000449611	0.000687368	1.28728e-06	Firmicutes	unclassified
aRSV186	-1.91302	4.22128	0.650416	NA	0.000330854	8.0441e-05	0	Proteobacteria	Desulfoplanes
aRSV187	-1.2997	1.45816	0.372753	0.481242	0.000125765	0.000133676	4.2045e-05	Bacteroidetes	Prevotella
aRSV188	3.57238	1.10273	0.00119707	0.00366017	0.000245833	8.19791e-05	0.0012357	Firmicutes	Oribacterium
aRSV189	-25.755	2.10138	1.55592e-34	5.04561e-33	0.00057464	0.000752943	0	Spirochaetae	Treponema
aRSV190	2.04734	1.82485	0.261896	0.360305	6.04999e-05	7.05507e-05	0.00051343	Fusobacteria	Leptotrichia
aRSV191	1.48037	1.7985	0.410442	0.509127	0.000157794	7.59227e-05	0.000495992	Firmicutes	unclassified
aRSV192	-1.03238	1.84975	0.576764	0.657917	0.000189104	0.000278736	0.000126082	Bacteroidetes	Capnocytophaga
aRSV193	-1.32943	0.803617	0.0980645	0.164894	0.00142292	0.00172048	0.000718882	Bacteroidetes	Alloprevotella
aRSV194	1.18013	2.29729	0.607458	0.679276	0.000166428	1.09618e-05	0.000154677	Firmicutes	Johnsonella
aRSV195	-25.1984	2.23478	1.73228e-29	4.91534e-28	0.000460604	0.000640733	0	Firmicutes	unclassified
aRSV196	2.00441	1.59389	0.208554	0.295886	0.000282679	0.000236151	0.00127537	Bacteroidetes	Alloprevotella
aRSV197	-2.47777	4.21949	0.557056	NA	0.000151698	6.75647e-05	0.000299247	Firmicutes	Exiguobacterium
aRSV198	-0.355647	4.22361	0.932894	NA	0.000555083	2.88948e-05	0	Spirochaetae	Treponema
aRSV199	1.01748	0.786235	0.195626	0.281058	0.00101875	0.0005767	0.00151709	Bacteroidetes	Prevotella
aRSV200	2.33848	1.10656	0.0345756	0.0659552	9.58041e-05	6.82477e-05	0.00042763	Bacteroidetes	Alloprevotella
aRSV201	-4.77849	1.92624	0.013111	0.0294672	0.000574317	0.000453322	2.94596e-05	Spirochaetae	Treponema
aRSV202	2.40382	2.30984	0.298022	0.400302	2.82969e-05	1.17843e-05	0.000252942	Saccharibacteria	unclassified
aRSV203	-3.64187	1.12104	0.00115953	0.00360567	0.000260356	0.000141512	1.24029e-05	Proteobacteria	unclassified
aRSV204	-0.0230889	3.22539	0.994288	0.998688	0.000151207	0.000126035	0.000290127	Firmicutes	Anaeroglobus
aRSV205	-0.355546	4.22361	0.932913	NA	0.000154292	0.000111389	0.000109275	Bacteroidetes	Prevotella
aRSV206	1.35947	1.97746	0.491778	0.581426	9.64358e-05	7.85808e-05	0.000257677	Firmicutes	Granulicatella
aRSV207	-24.7942	1.96053	1.16672e-36	5.2969e-35	0.00029269	0.000416091	0	Spirochaetae	Treponema
aRSV208	-4.00004	1.99244	0.0446851	0.0811481	0.000167298	0.00026449	0.000178638	Firmicutes	Selenomonas
aRSV209	-25.1711	2.01661	9.37745e-36	3.5478e-34	0.000356249	0.000591846	0	Proteobacteria	unclassified
aRSV210	-1.32404	1.9558	0.498419	0.586224	0.000140385	0.000224248	4.31969e-05	Actinobacteria	unclassified
aRSV211	3.24048	1.47856	0.0284056	0.0568065	4.48712e-05	4.5336e-05	0.000504731	Firmicutes	Stomatobaculum
aRSV212	-0.0645289	1.31914	0.960985	0.969527	0.000324362	0.000237289	0.000186541	Bacteroidetes	Bergeyella
aRSV213	0.12222	1.42394	0.9316	0.948071	8.12669e-05	3.32579e-05	4.72418e-05	Firmicutes	Erysipelotrichaceae_UCG-006
aRSV214	0.100096	1.01866	0.921725	0.942484	0.000339616	0.000231	0.000468373	Bacteroidetes	unclassified
aRSV215	-0.852054	1.75721	0.627754	0.688407	0.000164698	0.000127669	6.68394e-05	Proteobacteria	Comamonas
aRSV216	0.447704	2.77145	0.871667	NA	0.000106146	0.000199187	0.000349027	Firmicutes	Selenomonas
aRSV217	1.05258	1.42857	0.461239	0.556921	0.000179419	0.000142031	0.000404306	Actinobacteria	Corynebacterium
aRSV218	-1.71293	1.00602	0.0886283	0.151268	0.000123029	0.0001638	6.52991e-05	Firmicutes	Mogibacterium
aRSV219	-4.36185	3.19827	0.172626	0.257803	0.000468592	0.000635875	0	Spirochaetae	Treponema
aRSV220	-0.716887	4.22351	0.865217	NA	0.000104013	1.67423e-06	1.30373e-05	Firmicutes	Family_XIII_AD3011_group
aRSV221	-0.355466	4.22361	0.932928	NA	0.000895646	0.000458337	0.0018389	Firmicutes	Enterococcus
aRSV222	-4.76915	3.18604	0.134421	NA	0.00028312	0.000408042	0	Bacteroidetes	Rikenellaceae_RC9_gut_group
aRSV223	-2.48424	1.63483	0.128618	0.198614	9.10644e-05	5.14395e-05	9.55882e-06	Actinobacteria	Olsenella
aRSV224	-0.606999	1.98429	0.759679	0.80961	5.47383e-05	7.07532e-05	8.48212e-05	Bacteroidetes	Prevotella
aRSV225	4.50762	1.75152	0.0100663	0.0235572	2.84041e-05	1.67871e-05	0.00035794	Actinobacteria	Bifidobacterium
aRSV226	-4.69894	4.21374	0.264787	NA	0.000405004	0.000396853	0	Tenericutes	Acholeplasma
aRSV227	-5.36392	1.77312	0.0024852	0.00705176	0.000111389	0.00013633	3.9242e-05	Fusobacteria	Leptotrichia
aRSV228	-2.0024	2.16962	0.356046	NA	7.96732e-05	0.000112176	3.23956e-05	Bacteroidetes	Prevotellaceae_UCG-004
aRSV229	-4.70048	4.21373	0.264631	NA	0.00010897	0.000204649	0	Tenericutes	Acholeplasma
aRSV230	-0.161032	1.21168	0.894273	0.928896	0.000101234	7.54022e-05	8.99613e-05	Actinobacteria	Slackia
aRSV231	-2.70575	3.37898	0.423271	NA	0.000111302	0.000132008	0	Proteobacteria	Wolinella
aRSV232	-3.566	4.21588	0.397637	NA	0.000263401	0.000423096	0	Spirochaetae	Treponema
aRSV233	1.91301	1.38686	0.167777	0.25222	8.70167e-05	5.57199e-05	0.00039777	Fusobacteria	Leptotrichia
aRSV234	-5.0146	3.18601	0.115501	0.184638	0.000402041	0.000204458	0	Spirochaetae	Treponema
aRSV235	-1.3277	2.95293	0.652985	NA	0.000131054	0.000173254	2.49717e-05	Firmicutes	Lachnoanaerobaculum
aRSV236	-5.47357	2.02769	0.0069463	0.0171392	0.00022197	0.000198697	5.56479e-06	Proteobacteria	Desulfovibrio
aRSV237	-3.31632	1.79656	0.0649023	0.113329	5.57052e-05	7.86007e-05	4.40536e-05	Bacteroidetes	Capnocytophaga
aRSV238	-0.355606	4.22361	0.932902	NA	9.42261e-05	0.00011004	1.13281e-05	Firmicutes	Oribacterium
aRSV239	2.38995	1.45899	0.101402	0.169252	8.94448e-05	4.14189e-05	0.000301105	Saccharibacteria	unclassified
aRSV240	-4.88131	4.21352	0.246666	NA	0.000204564	0.000347098	0	Proteobacteria	Desulfomicrobium
aRSV241	1.53879	4.21993	0.715374	NA	1.29389e-05	0	0.00014286	Bacteroidetes	Prevotella
aRSV242	-0.502047	4.22344	0.905377	NA	9.06531e-05	0.000192098	2.82051e-05	Firmicutes	Streptococcus
aRSV243	-1.97534	3.91977	0.614302	NA	0.000365514	1.03157e-05	0	Fusobacteria	Leptotrichia
aRSV244	-2.79168	4.21842	0.50811	NA	0.000246703	0.000379465	0	Spirochaetae	Treponema
aRSV245	0	0	1	NA	0.000263176	0.000557682	0.000362691	Bacteroidetes	Prevotella
aRSV246	-0.85415	3.55851	0.810307	NA	5.10754e-05	9.98477e-05	8.25573e-06	Gracilibacteria	unclassified
aRSV247	0	0	1	NA	6.62848e-05	0.000140461	0	Saccharibacteria	unclassified
aRSV248	0.922489	2.86716	0.747648	NA	2.97517e-05	4.08319e-05	0.000114679	Firmicutes	Veillonella
aRSV249	2.11187	4.21839	0.61663	NA	7.79114e-06	0	0.00015728	Firmicutes	unclassified
aRSV250	-0.355528	4.22361	0.932916	NA	0.00013409	0.000178651	0	Firmicutes	unclassified
aRSV251	-3.02309	3.58923	0.399639	NA	0.000197373	0.000235479	0	Saccharibacteria	Candidatus_Saccharimonas
aRSV252	-2.3918	2.08458	0.251227	NA	7.96685e-05	4.7009e-05	0.000248597	Gracilibacteria	unclassified
aRSV253	-3.05858	2.70981	0.259022	0.358524	0.000289376	0.000163377	0	Bacteroidetes	unclassified
aRSV254	-1.91983	4.22126	0.649252	NA	0.000196097	4.6413e-05	0.000144197	Proteobacteria	Alishewanella
aRSV255	0	0	1	NA	0.000215028	0.000455655	0	Proteobacteria	Candidatus_Hepatincola
aRSV256	1.81502	1.12574	0.106898	0.17584	3.89099e-05	1.85998e-05	0.000104505	Firmicutes	Howardella
aRSV257	-2.7601	4.2172	0.512798	NA	3.53656e-05	3.34027e-05	4.28503e-05	Firmicutes	Lachnoanaerobaculum
aRSV258	1.0618	2.23972	0.635447	NA	6.22731e-05	2.0754e-05	2.49316e-05	Bacteroidetes	unclassified
aRSV259	2.16209	2.5574	0.397874	0.501763	2.71458e-05	4.77453e-05	0.000460699	Bacteroidetes	Prevotella
aRSV260	-0.854301	4.22351	0.839703	NA	0.0001309	0.000247812	9.04902e-06	Firmicutes	unclassified
aRSV261	1.22387	1.46379	0.403101	0.505547	7.53899e-05	0.00010029	0.000375875	Bacteroidetes	Prevotella
aRSV262	3.65993	4.21424	0.385138	NA	1.88606e-05	9.08798e-06	0.000101045	Firmicutes	Lactobacillus
aRSV263	-2.26448	3.82968	0.55432	NA	4.80101e-05	7.14889e-05	0	Bacteroidetes	Blvii28_wastewater-sludge_group
aRSV264	2.44113	3.66149	0.504961	NA	2.92037e-05	1.95127e-05	2.1247e-05	Bacteroidetes	Prevotella
aRSV265	-4.63812	2.77563	0.0947179	NA	8.01257e-05	9.75499e-05	0	Firmicutes	unclassified
aRSV266	-1.04805	4.22334	0.804012	NA	8.98738e-05	2.32439e-05	0	WS6	unclassified
aRSV267	-1.85589	1.72288	0.28139	NA	3.98839e-05	5.24376e-05	2.22544e-05	Firmicutes	Eggerthia
aRSV268	-1.86165	4.22144	0.659214	NA	0.00014882	8.9144e-05	0	Spirochaetae	Treponema
aRSV269	3.0879	3.81182	0.417891	NA	2.32147e-05	1.14535e-05	8.35523e-05	Actinobacteria	Propionibacterium
aRSV270	0	0	1	NA	1.53327e-05	2.07781e-05	0.000162492	Saccharibacteria	Candidatus_Saccharimonas
aRSV271	-0.355485	4.22361	0.932924	NA	1.15513e-05	2.34713e-05	0.000454041	Bacteroidetes	Prevotella
aRSV272	1.252	1.33986	0.350082	NA	3.59338e-05	1.51462e-05	5.79239e-05	Spirochaetae	Treponema
aRSV273	3.51731	3.6471	0.334839	NA	1.94933e-05	5.63717e-06	0.000154549	Firmicutes	Lactobacillus
aRSV274	-1.12142	4.22155	0.790515	NA	4.43688e-05	1.31722e-05	5.87826e-05	Firmicutes	Lactococcus
aRSV275	-1.74682	4.22179	0.679047	NA	3.54302e-05	2.85048e-05	0	Fusobacteria	Leptotrichia
aRSV276	0	0	1	NA	0.000136913	1.17652e-05	0.000249631	Bacteroidetes	Dysgonomonas
aRSV277	-0.355535	4.22361	0.932915	NA	0.000190761	0	0.000159702	Firmicutes	Fusibacter
aRSV278	-0.355529	4.22361	0.932916	NA	0.000114987	0.000238884	0	Bacteroidetes	unclassified
aRSV279	-1.30216	1.57901	0.409557	0.509127	0.000103638	0.000110389	5.204e-05	Actinobacteria	Actinomyces
aRSV280	0.210004	1.44429	0.884393	0.925148	0.000105532	0.000114712	0.00016139	Firmicutes	Oribacterium
aRSV281	-0.355509	4.22361	0.93292	NA	0.000161776	0.000328042	0	Tenericutes	Acholeplasma
aRSV282	-2.46158	3.17703	0.438455	NA	3.74856e-05	2.81694e-05	0	Bacteroidetes	Prevotella
aRSV283	-3.87764	2.00065	0.0525998	0.094017	4.30486e-05	4.92945e-05	1.13761e-05	Proteobacteria	Propionivibrio
aRSV284	-0.42663	2.32623	0.854484	NA	3.91681e-05	3.43022e-05	1.93914e-05	Bacteroidetes	Bacteroides
aRSV285	-3.89499	1.73931	0.0251309	0.0513937	6.36998e-05	6.99395e-05	2.19475e-06	Firmicutes	unclassified
aRSV286	-2.24966	4.22022	0.593987	NA	0.000127049	0.000182449	0	Bacteroidetes	unclassified
aRSV287	0.944844	4.12186	0.818692	NA	3.81085e-05	3.32234e-05	6.47547e-05	Firmicutes	Dialister
aRSV288	-0.355548	4.22361	0.932913	NA	1.37846e-05	1.09074e-05	0	Proteobacteria	unclassified
aRSV289	-1.38257	2.50329	0.580741	NA	2.62798e-05	3.64278e-05	1.84885e-05	Proteobacteria	unclassified
aRSV290	-1.98817	2.70565	0.462448	NA	1.16014e-05	1.37521e-05	2.14487e-05	Firmicutes	unclassified
aRSV291	-3.84331	3.37709	0.255098	NA	0.000120207	0.000160482	0	Spirochaetae	Treponema
aRSV292	-0.35557	4.22361	0.932908	NA	6.58767e-05	8.03317e-05	0	Saccharibacteria	Candidatus_Saccharimonas
aRSV293	0	0	1	NA	2.02178e-05	4.28425e-05	1.03406e-05	Bacteroidetes	Prevotella
aRSV294	2.34562	2.64758	0.375647	NA	1.60129e-05	0	4.143e-05	Actinobacteria	Cryptobacterium
aRSV295	-2.60308	2.02821	0.199339	NA	2.75783e-05	1.70164e-05	1.54615e-05	unclassified	unclassified
aRSV296	-0.70945	4.22355	0.866603	NA	9.50224e-05	0.000136246	0.000133343	Bacteroidetes	Bacteroides
aRSV297	0	0	1	NA	4.31148e-05	7.23222e-05	0	Bacteroidetes	Prevotella
aRSV298	-5.22595	4.19695	0.213066	NA	0.0001544	0.00032718	0	Firmicutes	Pelospora
aRSV299	3.88328	3.77716	0.303904	NA	6.74719e-07	1.42976e-06	0.000129226	Proteobacteria	Acinetobacter
aRSV300	-0.496311	4.2236	0.906457	NA	0.000150277	2.18974e-05	7.75251e-05	Firmicutes	Clostridium_sensu_stricto
aRSV301	-0.355527	4.22361	0.932916	NA	6.16669e-06	8.40203e-06	3.56225e-05	Bacteroidetes	Prevotella
aRSV302	-1.92812	4.2194	0.647696	NA	6.0495e-05	5.37669e-05	1.28422e-06	Bacteroidetes	Rikenellaceae_RC9_gut_group
aRSV303	-2.05522	4.22085	0.626314	NA	3.12997e-05	4.07658e-05	8.11291e-06	Firmicutes	Ezakiella
aRSV304	-2.05232	4.22086	0.626802	NA	2.6787e-05	5.46716e-05	0	Firmicutes	Lachnospiraceae_NK3A20_group
aRSV305	-1.3877	4.22269	0.742436	NA	6.15017e-05	1.07024e-05	0.000229474	Fusobacteria	unclassified
aRSV306	0	0	1	NA	0.000104883	8.7805e-05	0	Firmicutes	Roseburia
aRSV307	-0.355515	4.22361	0.932919	NA	1.34347e-05	2.78086e-05	0.00012404	Proteobacteria	Enhydrobacter
aRSV308	-0.355568	4.22361	0.932909	NA	7.1022e-05	2.50543e-05	0	Proteobacteria	Bilophila
aRSV309	-2.71282	4.21869	0.520194	NA	5.24428e-05	0.000102006	0	Firmicutes	Selenomonas
aRSV310	-0.355578	4.22361	0.932907	NA	6.67382e-05	1.17652e-05	0.000110086	Bacteroidetes	Bacteroides
aRSV311	-1.28317	4.22292	0.761236	NA	2.12819e-06	4.50974e-06	3.88346e-05	Bacteroidetes	Prevotella
aRSV312	0.154214	4.2234	0.970872	NA	2.57786e-05	5.46261e-05	3.48005e-06	Firmicutes	Lactobacillus
aRSV313	-2.24984	4.22022	0.593957	NA	2.60908e-05	4.57307e-05	0	Proteobacteria	Kingella
aRSV314	-1.30004	1.94578	0.504049	NA	4.7339e-05	4.89109e-05	2.84996e-05	Bacteroidetes	Flavobacterium
aRSV315	-2.56927	3.39683	0.449425	NA	2.28053e-05	1.39125e-05	0	Bacteroidetes	Rikenellaceae_RC9_gut_group
aRSV316	-1.18169	4.22315	0.779622	NA	4.57217e-05	9.05587e-06	0.000144197	Firmicutes	Lachnoclostridium
aRSV317	-2.5733	3.87282	0.506402	NA	1.08173e-05	2.13723e-05	0	Gracilibacteria	unclassified
aRSV318	-1.60836	4.22217	0.703253	NA	2.73152e-05	2.85397e-05	0	Spirochaetae	Treponema
aRSV319	-0.355517	4.22361	0.932918	NA	5.12678e-07	0	0.000105598	Firmicutes	Dialister
aRSV320	0	0	1	NA	3.17125e-06	0	2.69949e-05	Proteobacteria	Cardiobacterium
aRSV321	-3.88861	3.30882	0.239905	NA	3.59657e-05	7.44528e-05	2.04337e-05	Firmicutes	unclassified
aRSV322	3.609	4.09701	0.37838	NA	2.062e-05	9.29503e-07	2.90634e-05	Firmicutes	Staphylococcus
aRSV323	-0.355502	4.22361	0.932921	NA	8.15674e-06	0	0	Proteobacteria	Cardiobacterium
aRSV324	-0.355525	4.22361	0.932917	NA	5.45425e-06	7.66961e-06	0	Actinobacteria	Actinomyces
aRSV325	0.0738844	4.22348	0.986043	NA	7.64031e-05	0	9.30302e-06	Bacteroidetes	Dysgonomonas
aRSV326	-1.83187	4.22153	0.664336	NA	4.88368e-05	8.51177e-05	0	Firmicutes	Anaerovorax
aRSV327	0	0	1	NA	1.99253e-05	1.92038e-05	0	Elusimicrobia	unclassified
aRSV328	-2.79199	4.21842	0.508063	NA	8.28844e-05	8.43491e-05	0	Firmicutes	Candidatus_Soleaferrea
aRSV329	-0.3555	4.22361	0.932922	NA	3.73088e-05	0	7.28736e-05	Proteobacteria	Klebsiella
aRSV330	-0.355524	4.22361	0.932917	NA	4.30021e-05	0	0	Firmicutes	Intestinimonas
aRSV331	-0.931106	4.22345	0.825512	NA	2.85193e-05	8.5565e-06	9.14797e-05	Bacteroidetes	Paludibacter
aRSV332	-0.781563	4.22353	0.85319	NA	6.57013e-06	1.21161e-06	0	Firmicutes	Peptoniphilus
aRSV333	-0.854274	4.22351	0.839708	NA	1.28573e-05	2.72452e-05	9.92322e-05	Bacteroidetes	unclassified
aRSV334	2.14789	4.21827	0.610622	NA	3.2788e-06	6.94793e-06	2.25996e-05	Actinobacteria	Actinomyces
aRSV335	-0.355503	4.22361	0.932921	NA	8.10598e-06	8.81189e-06	0	Actinobacteria	Lawsonella
aRSV336	0.399093	4.22299	0.924708	NA	2.53846e-06	0	1.59239e-05	Actinobacteria	Propionibacterium
aRSV337	-0.355511	4.22361	0.932919	NA	6.05685e-06	1.28347e-05	9.76817e-05	Firmicutes	unclassified
aRSV338	-0.355494	4.22361	0.932923	NA	1.13701e-05	0	5.42676e-05	Bacteroidetes	Dysgonomonas
aRSV339	2.6463	3.87417	0.494567	NA	3.15788e-05	0	4.27755e-05	Bacteroidetes	Cloacibacterium
aRSV340	-1.16278	4.22318	0.783061	NA	9.28098e-06	1.36188e-05	0	Saccharibacteria	unclassified
aRSV341	1.55397	4.21989	0.712688	NA	0	0	2.61427e-05	Proteobacteria	Diaphorobacter
aRSV342	1.78227	4.21935	0.67273	NA	0	0	1.18766e-05	Bacteroidetes	unclassified
aRSV343	-1.68324	4.22197	0.690125	NA	6.54868e-06	4.79861e-06	0	Proteobacteria	Phaselicystis
aRSV344	0.675371	4.2224	0.872921	NA	1.09654e-06	0	5.01867e-06	Actinobacteria	Aestuariimicrobium
aRSV345	2.37424	4.21756	0.573474	NA	8.19993e-07	0	2.93138e-05	Bacteroidetes	Capnocytophaga
aRSV346	-0.355553	4.22361	0.932912	NA	2.96172e-06	0	0	Firmicutes	Catabacter
aRSV347	-1.20311	4.2231	0.77573	NA	1.17798e-06	2.49619e-06	0	Tenericutes	unclassified
aRSV348	0.149668	4.2234	0.971731	NA	2.08685e-05	0	2.85187e-06	Bacteroidetes	Bergeyella
aRSV349	-0.854294	4.22351	0.839705	NA	1.19312e-05	5.76283e-06	2.79091e-05	Firmicutes	unclassified
aRSV350	-0.355607	4.22216	0.932878	NA	5.32092e-06	3.82736e-06	3.57725e-06	Firmicutes	Erysipelotrichaceae_UCG-004
aRSV351	-2.81427	4.21673	0.504513	NA	1.37249e-05	2.90838e-05	5.12455e-06	Bacteroidetes	Bacteroides
aRSV352	0.91731	4.20947	0.827495	NA	4.54805e-06	0	8.77816e-06	Proteobacteria	Brevundimonas
aRSV353	-1.02317	2.70429	0.70517	NA	1.56979e-05	1.0591e-05	2.20878e-07	Bacteroidetes	Prevotella
aRSV354	1.36576	4.22039	0.746234	NA	0	0	2.24676e-05	Proteobacteria	Pseudomonas
aRSV355	-0.406722	4.22361	0.923284	NA	1.31944e-06	1.97565e-07	0	Actinobacteria	Actinomyces
aRSV356	-0.85429	4.22351	0.839705	NA	8.7605e-06	9.3832e-06	0	Bacteroidetes	Elizabethkingia
aRSV357	-1.28918	4.22276	0.760144	NA	2.22251e-06	4.7096e-06	2.20878e-07	Bacteroidetes	Prevotella
aRSV358	-0.288842	4.22356	0.945477	NA	1.70246e-06	1.12743e-06	1.24814e-06	Bacteroidetes	Prevotella
aRSV359	0.405511	4.22298	0.923501	NA	0	0	4.70843e-06	Cyanobacteria	unclassified
aRSV360	-0.705407	4.22355	0.867356	NA	1.81438e-06	2.2896e-06	0	Bacteroidetes	Prevotella

## Sheet: Placebo Group
aRSV-ID	log2FoldChange	lfcSE	p-value	padj	MRRCb (before/both groups)	MRRC (before/placebo)	MRRC (after/placebo)	Phylum	Genus
aRSV1	-0.867793	0.84965	0.307087	0.998389	0.0951921	0.0869496	0.0463392	Bacteroidetes	Porphyromonas
aRSV2	0.0350089	0.225018	0.876362	0.998389	0.164455	0.174934	0.178762	Fusobacteria	Fusobacterium
aRSV3	-0.573209	0.600136	0.339511	0.998389	0.050782	0.0464197	0.029371	Bacteroidetes	Tannerella
aRSV4	0.634634	0.298884	0.033725	0.998389	0.0279406	0.0298953	0.0370372	Firmicutes	Streptococcus
aRSV5	0.228834	0.595504	0.700778	0.998389	0.0173267	0.0155124	0.0166383	Bacteroidetes	Prevotella
aRSV6	1.05533	0.394871	0.00752665	0.52536	0.0243544	0.0271053	0.043585	Firmicutes	Veillonella
aRSV7	-0.884693	0.70687	0.210729	0.998389	0.0239247	0.0216848	0.0109787	Firmicutes	Filifactor
aRSV8	0.14754	0.400914	0.712867	0.998389	0.0159196	0.015492	0.0141418	Proteobacteria	Campylobacter
aRSV9	-0.479533	0.621715	0.440525	0.998389	0.0216049	0.018378	0.0129432	Spirochaetae	Treponema
aRSV10	0.0403577	0.632674	0.949138	0.998389	0.0175395	0.0179021	0.0178673	Bacteroidetes	unclassified
aRSV11	-0.357381	0.539189	0.50745	0.998389	0.0122084	0.0113506	0.00831974	Synergistetes	Fretibacterium
aRSV12	-0.0221826	0.425379	0.958411	0.998389	0.0113872	0.00997668	0.00985818	Firmicutes	Parvimonas
aRSV13	-0.728786	1.93631	0.706635	0.998389	0.0152481	0.00462485	0.00341966	Fusobacteria	Oceanivirga
aRSV14	-0.63969	0.626124	0.306939	0.998389	0.0332717	0.0319333	0.0196168	Synergistetes	Fretibacterium
aRSV15	0.66558	0.642828	0.300485	0.998389	0.00712057	0.00866841	0.0111872	Proteobacteria	Neisseria
aRSV16	-0.16421	0.668091	0.805845	0.998389	0.00506217	0.00518014	0.00405124	Firmicutes	Peptostreptococcus
aRSV17	0.457487	0.595942	0.442683	0.998389	0.0232622	0.0242911	0.0274008	Bacteroidetes	Porphyromonas
aRSV18	2.2241	0.488307	5.24566e-06	0.000915368	0.00494082	0.00497196	0.0243287	Actinobacteria	Rothia
aRSV19	1.29155	0.49893	0.00963568	0.560476	0.00951841	0.00651408	0.0123574	Proteobacteria	Haemophilus
aRSV20	-0.645704	0.552983	0.242938	0.998389	0.00694287	0.00654907	0.00447151	Firmicutes	unclassified
aRSV21	-0.417257	0.595376	0.48341	0.998389	0.00699595	0.00614677	0.00420062	Firmicutes	unclassified
aRSV22	-0.034246	0.506297	0.946072	0.998389	0.00483753	0.0046833	0.00470665	Firmicutes	Dialister
aRSV23	-0.961174	0.96314	0.3183	0.998389	0.0156269	0.0158894	0.00695535	Spirochaetae	Treponema
aRSV24	-0.576338	0.902418	0.523045	0.998389	0.0230675	0.0218032	0.014824	Bacteroidetes	Prevotella
aRSV25	0.00141523	0.70079	0.998389	0.998389	0.00415157	0.00460929	0.00415669	Firmicutes	Anaeroglobus
aRSV26	1.48882	0.608294	0.0143835	0.717122	0.00219923	0.00298058	0.00819608	Proteobacteria	Lautropia
aRSV27	-0.258009	0.67167	0.700882	0.998389	0.00544572	0.00460563	0.00382161	Firmicutes	Dialister
aRSV28	0.913668	0.674514	0.175559	0.998389	0.009194	0.00932101	0.0177853	Bacteroidetes	Alloprevotella
aRSV29	-0.976367	0.703071	0.164919	0.998389	0.00707328	0.00745792	0.00356764	Proteobacteria	Desulfobulbus
aRSV30	-0.0198456	0.926591	0.982912	0.998389	0.00357397	0.00458271	0.00353143	Saccharibacteria	unclassified
aRSV31	0.70713	0.763364	0.354273	0.998389	0.0026339	0.00327396	0.00286536	Proteobacteria	Neisseria
aRSV32	0.917479	0.534785	0.0862348	0.998389	0.00900885	0.00626205	0.0116653	Firmicutes	Streptococcus
aRSV33	-0.444438	0.768873	0.563239	0.998389	0.00560308	0.00606988	0.004028	Spirochaetae	Treponema
aRSV34	-0.113928	0.765497	0.881688	0.998389	0.00327917	0.00429759	0.00362572	Saccharibacteria	unclassified
aRSV35	-0.984057	1.01622	0.332868	0.998389	0.00539173	0.0039503	0.00173706	Firmicutes	unclassified
aRSV36	0.30721	0.398668	0.44095	0.998389	0.00557773	0.00660879	0.00860101	Proteobacteria	Campylobacter
aRSV37	0.881546	0.510819	0.084392	0.998389	0.00159716	0.00162401	0.00242752	Firmicutes	Granulicatella
aRSV38	0.403637	0.921014	0.661203	0.998389	0.00185284	0.00173646	0.00211164	Saccharibacteria	unclassified
aRSV39	-0.241065	0.537683	0.653908	0.998389	0.0242123	0.0235286	0.0162346	Spirochaetae	Treponema
aRSV40	1.08255	0.582877	0.0632744	0.998389	0.00177919	0.0021846	0.00494063	Firmicutes	Oribacterium
aRSV41	0.0550982	0.437195	0.899711	0.998389	0.0137881	0.0155562	0.0150374	Firmicutes	Selenomonas
aRSV42	0.523254	0.53558	0.328576	0.998389	0.00729756	0.00842403	0.0116776	Bacteroidetes	Prevotella
aRSV43	0.192761	0.863672	0.823389	0.998389	0.00607566	0.00576315	0.0056818	Bacteroidetes	unclassified
aRSV44	0.413395	0.576756	0.473522	0.998389	0.00469723	0.00514313	0.00705838	Fusobacteria	Leptotrichia
aRSV45	0.411131	0.869863	0.636471	0.998389	0.0021089	0.00275062	0.00471004	Fusobacteria	Leptotrichia
aRSV46	-20.769	2.4512	2.39223e-17	8.34887e-15	0.00181836	7.48437e-05	9.9009e-05	Synergistetes	Pyramidobacter
aRSV47	1.69005	0.904529	0.0617023	0.998389	0.00235896	0.00223287	0.00311446	Bacteroidetes	Prevotella
aRSV48	0.370647	0.465085	0.425483	0.998389	0.00681403	0.00992004	0.012712	Bacteroidetes	Capnocytophaga
aRSV49	-0.120193	0.356508	0.736013	0.998389	0.00854263	0.00859707	0.00752351	Spirochaetae	Treponema
aRSV50	0.0846485	1.14896	0.94127	0.998389	0.00433656	0.00403498	0.00403718	Bacteroidetes	Prevotella
aRSV51	0.0800229	0.929894	0.931422	0.998389	0.00196895	0.00268598	0.00276733	Fusobacteria	Leptotrichia
aRSV52	0.47317	0.437148	0.279074	0.998389	0.00492736	0.00555425	0.00680125	Firmicutes	Gemella
aRSV53	-1.42335	0.725105	0.0496519	0.998389	0.00330791	0.00326608	0.00107626	Bacteroidetes	Phocaeicola
aRSV54	0.295039	0.490929	0.547853	0.998389	0.00351186	0.00375531	0.00441993	Firmicutes	Catonella
aRSV55	-0.588292	0.665129	0.376438	0.998389	0.00406121	0.00447464	0.00256418	Firmicutes	Defluviitaleaceae_UCG-011
aRSV56	0.207148	0.902686	0.818496	0.998389	0.00110812	0.00108719	0.00175278	Bacteroidetes	Porphyromonas
aRSV57	0.767078	0.552321	0.164886	0.998389	0.00215027	0.00293239	0.00554208	Bacteroidetes	Tannerella
aRSV58	2.88972	0.682161	2.27417e-05	0.00264562	0.0011644	0.000714258	0.00485264	Proteobacteria	Kingella
aRSV59	-0.132201	1.12371	0.906348	0.998389	0.00208093	0.0027475	0.00244018	Fusobacteria	Leptotrichia
aRSV60	0.948261	0.523438	0.0700481	0.998389	0.00506168	0.00611395	0.0112821	Bacteroidetes	Capnocytophaga
aRSV61	0.566891	0.872661	0.515943	0.998389	0.00269124	0.00309645	0.00363378	Saccharibacteria	unclassified
aRSV62	-0.69633	0.910281	0.444295	0.998389	0.00345419	0.00313066	0.00161752	Tenericutes	Mycoplasma
aRSV63	-0.310058	1.48567	0.834683	0.998389	0.00553016	0.00491395	0.00358749	Firmicutes	unclassified
aRSV64	0.585336	1.02523	0.568048	0.998389	0.000843535	0.00131902	0.00197581	Firmicutes	Ruminococcaceae_UCG-014
aRSV65	-0.412313	0.842762	0.624672	0.998389	0.00419572	0.00491507	0.0040393	Fusobacteria	Leptotrichia
aRSV66	-0.306023	0.510218	0.548647	0.998389	0.00655683	0.0064282	0.00445388	Spirochaetae	Treponema
aRSV67	0.380411	0.88043	0.665688	0.998389	0.00119589	0.00149983	0.0023939	Bacteroidetes	Capnocytophaga
aRSV68	0.231771	1.56608	0.882348	0.998389	0.00314303	0.00274393	0.00256697	Bacteroidetes	unclassified
aRSV69	0.645139	0.500515	0.197415	0.998389	0.00546727	0.00522031	0.00786077	Firmicutes	unclassified
aRSV70	-0.996772	0.988052	0.313058	0.998389	0.00151648	0.00124159	0.00114704	Proteobacteria	Neisseria
aRSV71	-1.69429	0.792398	0.0325019	0.998389	0.0018065	0.00129376	0.000397331	Firmicutes	Pseudoramibacter
aRSV72	-0.195991	0.692623	0.777201	0.998389	0.00297858	0.00439721	0.00316631	Bacteroidetes	Capnocytophaga
aRSV73	-0.51953	0.868001	0.549482	0.998389	0.00375807	0.00430216	0.00297545	Bacteroidetes	Prevotella
aRSV74	-2.05686	2.31218	0.373694	0.998389	0.00307791	0.00404298	0.000909753	Bacteroidetes	Odoribacter
aRSV75	-0.014137	1.43128	0.992119	0.998389	0.000664904	0.000533992	0.00118219	Proteobacteria	Aggregatibacter
aRSV76	0.305677	0.669516	0.647984	0.998389	0.00440134	0.00520981	0.00639198	Proteobacteria	unclassified
aRSV77	1.37452	0.825356	0.0958391	0.998389	0.00119042	0.00123896	0.00260502	Proteobacteria	unclassified
aRSV78	0.129817	0.580892	0.823164	0.998389	0.000873033	0.000901682	0.00100756	Firmicutes	Solobacterium
aRSV79	1.53332	0.759408	0.0434761	0.998389	0.00111342	0.00113781	0.00356094	Actinobacteria	Actinomyces
aRSV80	0.957407	0.73358	0.191853	0.998389	0.00332451	0.00405948	0.00866317	Saccharibacteria	unclassified
aRSV81	-1.36712	0.759336	0.0717946	0.998389	0.00233694	0.00204731	0.000728907	Chloroflexi	unclassified
aRSV82	-0.0422496	0.830965	0.95945	0.998389	0.00161555	0.00118468	0.00109753	Bacteroidetes	Prevotella
aRSV83	0.543451	0.543254	0.317135	0.998389	0.00184003	0.00229605	0.00337826	Firmicutes	Lachnoanaerobaculum
aRSV84	-0.489305	1.41723	0.729903	0.998389	0.00300202	0.00203781	0.00135051	Firmicutes	Parvimonas
aRSV85	-0.251271	0.757671	0.740164	0.998389	0.00311206	0.00366431	0.0058509	Bacteroidetes	Prevotella
aRSV86	1.00058	0.6702	0.135449	0.998389	0.00247685	0.00395653	0.00483407	Fusobacteria	Leptotrichia
aRSV87	0.0372391	0.67861	0.956238	0.998389	0.00332536	0.0028159	0.00277976	Firmicutes	Peptococcus
aRSV88	1.19018	0.845882	0.159418	0.998389	0.00315098	0.00411358	0.00881294	Bacteroidetes	Porphyromonas
aRSV89	1.33709	1.39726	0.338601	0.998389	0.00023931	0.000326025	0.00131338	Proteobacteria	Neisseria
aRSV90	3.78453	1.27493	0.00299335	0.26117	0.000713751	0.000993539	0.00344817	Firmicutes	Selenomonas
aRSV91	-1.35082	0.71051	0.057277	0.998389	0.00284542	0.00254928	0.0014026	Firmicutes	unclassified
aRSV92	1.12795	0.909834	0.215076	0.998389	0.00106586	0.00128386	0.00286662	Firmicutes	unclassified
aRSV93	-0.526613	0.685208	0.442164	0.998389	0.00348729	0.00420429	0.00305149	Bacteroidetes	Prevotella
aRSV94	0.976337	0.564336	0.0836188	0.998389	0.00258813	0.00301303	0.00636806	Firmicutes	unclassified
aRSV95	0.327876	1.03184	0.750669	0.998389	0.000373983	0.0002728	0.000352965	Firmicutes	Streptococcus
aRSV96	-1.88162	1.73507	0.278159	0.998389	0.000946947	0.00114439	0.000964838	Proteobacteria	Desulfovibrio
aRSV97	2.01271	1.02622	0.0498459	0.998389	0.000412223	0.000491984	0.00163119	Firmicutes	Abiotrophia
aRSV98	0.921129	0.537724	0.0867101	0.998389	0.000776884	0.00108632	0.00157459	Bacteroidetes	Bergeyella
aRSV99	-0.705119	0.90436	0.435574	0.998389	0.00178266	0.00166133	0.0010493	Bacteroidetes	Rikenellaceae_RC9_gut_group
aRSV100	-0.953287	0.797766	0.232108	0.998389	0.00368353	0.00508355	0.00286206	Firmicutes	Selenomonas
aRSV101	-0.227278	0.693128	0.742986	0.998389	0.00282807	0.00393854	0.00316813	Bacteroidetes	Prevotella
aRSV102	0.820814	1.2798	0.521288	0.998389	0.000687695	0.000647732	0.000839382	Firmicutes	unclassified
aRSV103	0.784276	0.452808	0.0832686	0.998389	0.002089	0.00220963	0.00409453	Proteobacteria	unclassified
aRSV104	0.0956361	0.916229	0.916868	0.998389	0.000437351	0.000550494	0.000462416	Firmicutes	Selenomonas
aRSV105	-1.27034	1.12603	0.259252	0.998389	0.00200461	0.00128492	0.000503787	Firmicutes	Butyrivibrio_2
aRSV106	-0.507975	1.00598	0.61359	0.998389	0.00149415	0.00126836	0.000809603	Firmicutes	Johnsonella
aRSV107	0.83479	1.11278	0.453142	0.998389	0.000794267	0.00123398	0.00130867	Fusobacteria	Leptotrichia
aRSV108	0.728556	0.97211	0.453581	0.998389	0.000508513	0.000385249	0.000563818	Bacteroidetes	Prevotella
aRSV109	0.399159	0.771503	0.604892	0.998389	0.00175419	0.00175819	0.00224464	Firmicutes	Selenomonas
aRSV110	-0.372511	0.837156	0.65634	0.998389	0.000687413	0.00082508	0.000723762	Firmicutes	unclassified
aRSV111	-0.0772146	0.675178	0.908951	0.998389	0.00203225	0.00227853	0.00179512	Firmicutes	Selenomonas
aRSV112	2.34924	1.18666	0.0477366	0.998389	0.000298287	0.000225998	0.00105775	Firmicutes	Selenomonas
aRSV113	-0.290129	0.667401	0.663769	0.998389	0.000910405	0.000846745	0.000525382	Spirochaetae	Treponema
aRSV114	-0.054949	0.673568	0.934981	0.998389	0.00159749	0.0019563	0.00166589	Actinobacteria	Atopobium
aRSV115	-0.302837	0.841368	0.718896	0.998389	0.00200881	0.0022069	0.0015967	Firmicutes	Selenomonas
aRSV116	-0.720045	1.43379	0.615528	0.998389	0.00117848	0.0014135	0.000777729	Spirochaetae	Treponema
aRSV117	1.78359	1.24997	0.153605	0.998389	0.000857532	0.0013532	0.00387954	Bacteroidetes	Prevotella
aRSV118	0.519525	0.752011	0.489661	0.998389	0.00221681	0.00248854	0.00383471	Actinobacteria	Corynebacterium
aRSV119	-0.171647	1.04439	0.869454	0.998389	0.00107226	0.00146966	0.00138357	Proteobacteria	Eikenella
aRSV120	0.693279	0.611496	0.256903	0.998389	0.0011945	0.00113074	0.00204665	Proteobacteria	Campylobacter
aRSV121	-0.446226	0.864336	0.60567	0.998389	0.000646141	0.000807786	0.00126879	Tenericutes	Mycoplasma
aRSV122	0.428354	0.983151	0.663058	0.998389	0.000810078	0.00121272	0.00130244	Firmicutes	Megasphaera
aRSV123	0.653193	1.07105	0.541954	0.998389	0.000917093	0.000883392	0.00101733	Firmicutes	Catonella
aRSV124	-0.281163	1.50981	0.852269	0.998389	0.000420255	0.000512413	0.00041744	Saccharibacteria	unclassified
aRSV125	1.40748	1.01303	0.164717	0.998389	0.000297631	0.000424149	0.00109985	Bacteroidetes	Prevotella
aRSV126	0.251247	0.690174	0.715832	0.998389	0.00127203	0.00147572	0.00206834	Proteobacteria	Cardiobacterium
aRSV127	1.14493	0.905463	0.206061	0.998389	0.000163111	0.000197649	0.000550452	Firmicutes	Stomatobaculum
aRSV128	0.045676	1.01606	0.964144	0.998389	0.000785587	0.000940702	0.00105093	SR1_(Absconditabacteria)	unclassified
aRSV129	-1.30727	2.258	0.562624	0.998389	0.00120821	0.00114757	0.000925427	Proteobacteria	Aggregatibacter
aRSV130	-0.00666183	0.97327	0.994539	0.998389	0.00306522	0.00217702	0.00219727	Bacteroidetes	Prevotella
aRSV131	-0.341568	1.2737	0.788568	0.998389	0.00189323	0.00217123	0.00123344	Spirochaetae	Treponema
aRSV132	1.39416	1.03303	0.177151	0.998389	0.000382545	0.000403066	0.00128372	Bacteroidetes	Capnocytophaga
aRSV133	2.198	1.74449	0.207682	0.998389	0.000429765	0.000438903	0.00214183	Bacteroidetes	Alloprevotella
aRSV134	1.29212	0.666065	0.0523884	0.998389	0.000539764	0.000449598	0.00128425	Actinobacteria	Actinomyces
aRSV135	1.64503	1.16877	0.159281	0.998389	0.000788353	0.000649241	0.00192927	Firmicutes	Selenomonas
aRSV136	1.16771	1.26082	0.354367	0.998389	0.000318399	0.000472749	0.000903594	Bacteroidetes	Prevotella
aRSV137	1.29465	1.35827	0.340509	0.998389	0.000422884	0.000659116	0.00160547	Fusobacteria	Leptotrichia
aRSV138	2.19293	1.04424	0.0357273	0.998389	0.000403343	0.000390494	0.00189429	Proteobacteria	Cardiobacterium
aRSV139	-1.01989	0.874843	0.243698	0.998389	0.000963985	0.000701245	0.000322253	Firmicutes	Moryella
aRSV140	-0.27402	0.823503	0.739323	0.998389	0.00125941	0.00102168	0.0007273	Firmicutes	unclassified
aRSV141	-1.57985	2.34092	0.499748	0.998389	0.000384183	0.00021475	9.81401e-05	Firmicutes	Streptococcus
aRSV142	-0.46752	0.894681	0.601284	0.998389	0.000490429	0.00038155	0.000297955	Firmicutes	Family_XIII_UCG-001
aRSV143	-1.2629	1.98889	0.525444	0.998389	0.0010335	0.000140169	0.000128965	Bacteroidetes	Bacteroides
aRSV144	-0.312752	1.19196	0.793024	0.998389	0.000482956	0.000579076	0.000398165	Actinobacteria	Olsenella
aRSV145	-0.419081	1.62149	0.796057	0.998389	0.00101883	0.00128144	0.0009897	Bacteroidetes	Prevotella
aRSV146	-0.757359	1.99078	0.703624	0.998389	0.000498168	0.00031946	0.000150962	Spirochaetae	Sphaerochaeta
aRSV147	1.12175	1.74355	0.519983	0.998389	5.58586e-05	1.73666e-05	3.64985e-05	Actinobacteria	Scardovia
aRSV148	-1.55516	1.24833	0.212839	0.998389	0.000460937	0.000363473	0.000187432	Firmicutes	Bulleidia
aRSV149	1.09373	1.21689	0.368763	0.998389	0.000139832	0.000244525	0.000515174	Firmicutes	Ruminococcaceae_UCG-014
aRSV150	2.88562	2.02405	0.153964	0.998389	0.000185992	0.000221734	0.00202114	Proteobacteria	Haemophilus
aRSV151	-0.889833	3.99175	0.823599	0.998389	0.000893033	0.000193837	0.0002395	Tenericutes	Acholeplasma
aRSV152	1.12818	0.79619	0.156492	0.998389	0.000975604	0.00128031	0.00252222	Bacteroidetes	Prevotella
aRSV153	1.13133	0.935374	0.226474	0.998389	0.000685221	0.000506815	0.000847826	Actinobacteria	Rothia
aRSV154	0.903366	0.763668	0.236837	0.998389	0.000777285	0.00102863	0.00172375	Bacteroidetes	Prevotella
aRSV155	-1.02832	2.54272	0.685907	0.998389	0.000359492	0.000397975	0.000166064	Bacteroidetes	Porphyromonas
aRSV156	-0.614152	0.955511	0.520388	0.998389	0.000436071	0.000369928	0.000231747	Firmicutes	Family_XIII_UCG-001
aRSV157	0.32047	1.15453	0.781337	0.998389	0.000853625	0.000576445	0.000654194	Tenericutes	unclassified
aRSV158	-0.173406	2.47975	0.94425	0.998389	0.000644041	0.000706959	8.82068e-05	Spirochaetae	Treponema
aRSV159	1.99246	1.26767	0.116009	0.998389	0.000205962	0.000215451	0.000852289	Firmicutes	Johnsonella
aRSV160	-0.0965918	1.74375	0.955825	0.998389	0.000640622	0.00052714	0.00049379	Spirochaetae	Treponema
aRSV161	0.489786	1.2264	0.689622	0.998389	0.000613429	0.000546526	0.000721556	Bacteroidetes	Rikenellaceae_RC9_gut_group
aRSV162	-0.288275	1.41257	0.838292	0.998389	0.000217157	0.000268461	0.000287407	Firmicutes	Veillonella
aRSV163	-1.38968	1.87545	0.458702	0.998389	0.000503571	0.000699602	0.000262029	Firmicutes	unclassified
aRSV164	-0.479257	1.13205	0.672039	0.998389	0.000399126	0.00028092	0.000299757	Spirochaetae	Treponema
aRSV165	-2.84366	2.60296	0.274625	0.998389	0.000596592	0.000181394	2.018e-06	Firmicutes	Lactobacillus
aRSV166	-0.0103326	1.43173	0.994242	0.998389	0.000181291	0.000202366	0.000175109	Bacteroidetes	Prevotella
aRSV167	1.31653	0.891603	0.139786	0.998389	0.000550793	0.000675807	0.00167377	Firmicutes	Johnsonella
aRSV168	0.519552	1.2609	0.680305	0.998389	0.00161005	0.00301123	0.00150274	Bacteroidetes	Prevotella
aRSV169	-2.0736	3.64818	0.569769	0.998389	0.000334609	0.000465206	0.000208692	Bacteroidetes	unclassified
aRSV170	0.479629	1.83936	0.794279	0.998389	0.000260383	0.000225492	0.000337408	Saccharibacteria	Candidatus_Saccharimonas
aRSV171	1.49071	1.37637	0.278777	0.998389	0.000122085	0.000108521	0.000357392	Bacteroidetes	Prevotella
aRSV172	1.28017	0.971648	0.187664	0.998389	0.000233629	0.000305611	0.000790427	Bacteroidetes	Prevotella
aRSV173	-0.0487225	2.10776	0.981558	0.998389	0.000354113	0.000638185	0.00104374	Saccharibacteria	unclassified
aRSV174	-2.94538	2.23386	0.187331	0.998389	0.000392805	0.000530371	0.000274829	Bacteroidetes	Bacteroides
aRSV175	0.170679	1.99068	0.931674	0.998389	0.000478679	0.000510125	0.000447558	Bacteroidetes	Capnocytophaga
aRSV176	2.14127	1.90044	0.259859	0.998389	0.000138459	0.000132073	0.000489645	Proteobacteria	Actinobacillus
aRSV177	-0.102255	3.99246	0.979567	0.998389	0.000162318	0.000183954	0.000349929	Spirochaetae	Treponema
aRSV178	0	0	1	NA	2.00992e-06	3.80602e-06	5.13461e-06	Firmicutes	Lactobacillus
aRSV179	1.49023	1.79045	0.405227	0.998389	0.000114136	0.000165508	0.000389587	Firmicutes	Selenomonas
aRSV180	0.354443	0.97336	0.71575	0.998389	0.00013833	0.000160282	0.000385107	Actinobacteria	unclassified
aRSV181	-0.756824	1.37725	0.582648	0.998389	0.00041472	0.000542831	0.000276812	Firmicutes	Shuttleworthia
aRSV182	0.117747	1.34718	0.930352	0.998389	0.0001734	0.000287026	0.000420021	Saccharibacteria	Candidatus_Saccharimonas
aRSV183	-0.362979	1.36288	0.789982	0.998389	0.000245113	0.000297467	0.000347775	Actinobacteria	unclassified
aRSV184	0.104423	1.27384	0.934667	0.998389	0.000324942	0.000501242	0.000384669	Firmicutes	Selenomonas
aRSV185	-0.555278	1.13797	0.625581	0.998389	0.000449611	0.000237146	0.000155762	Firmicutes	unclassified
aRSV186	2.20401	3.98809	0.580504	0.998389	0.000330854	0.000554626	0.000418513	Proteobacteria	Desulfoplanes
aRSV187	0.617516	1.37328	0.652953	0.998389	0.000125765	0.000118696	0.000208262	Bacteroidetes	Prevotella
aRSV188	1.05969	1.03791	0.307263	0.998389	0.000245833	0.000392256	0.000675481	Firmicutes	Oribacterium
aRSV189	-0.802477	1.96621	0.683175	0.998389	0.00057464	0.000415305	0.000244524	Spirochaetae	Treponema
aRSV190	4.13132	1.72947	0.0169045	0.73746	6.04999e-05	5.15183e-05	0.000782873	Fusobacteria	Leptotrichia
aRSV191	-0.376893	1.69117	0.823645	0.998389	0.000157794	0.000230956	0.000170955	Firmicutes	unclassified
aRSV192	1.45999	1.74923	0.403919	0.998389	0.000189104	0.000109006	0.000291105	Bacteroidetes	Capnocytophaga
aRSV193	0.0121739	0.759852	0.987217	0.998389	0.00142292	0.00115701	0.00116288	Bacteroidetes	Alloprevotella
aRSV194	-0.0329007	2.15497	0.987819	0.998389	0.000166428	0.000305355	0.000165852	Firmicutes	Johnsonella
aRSV195	0.907478	2.0929	0.66458	0.998389	0.000460604	0.000299638	0.000489661	Firmicutes	unclassified
aRSV196	0.637514	1.50831	0.672538	0.998389	0.000282679	0.000324258	0.000317973	Bacteroidetes	Alloprevotella
aRSV197	-0.102249	3.99246	0.979568	0.998389	0.000151698	0.000226881	0.00131088	Firmicutes	Exiguobacterium
aRSV198	-4.85761	3.98273	0.222591	0.998389	0.000555083	0.00102529	8.47576e-05	Spirochaetae	Treponema
aRSV199	0.246113	0.742746	0.740376	0.998389	0.00101875	0.00141377	0.00170758	Bacteroidetes	Prevotella
aRSV200	1.31561	1.0455	0.208265	0.998389	9.58041e-05	0.000120429	0.000260859	Bacteroidetes	Alloprevotella
aRSV201	-0.50538	1.80662	0.779678	0.998389	0.000574317	0.00068244	0.000463904	Spirochaetae	Treponema
aRSV202	2.13938	2.17607	0.325538	0.998389	2.82969e-05	4.30528e-05	0.000198685	Saccharibacteria	unclassified
aRSV203	-0.152031	1.03514	0.883234	0.998389	0.000260356	0.000366557	0.000288725	Proteobacteria	unclassified
aRSV204	-3.66605	3.0588	0.230713	0.998389	0.000151207	0.000173701	4.08368e-05	Firmicutes	Anaeroglobus
aRSV205	-0.72809	3.98802	0.855136	0.998389	0.000154292	0.000192631	0.000261068	Bacteroidetes	Prevotella
aRSV206	0.677732	1.86886	0.716871	0.998389	9.64358e-05	0.000112391	0.000191367	Firmicutes	Granulicatella
aRSV207	0.311151	1.833	0.865207	0.998389	0.00029269	0.000182417	0.000180857	Spirochaetae	Treponema
aRSV208	1.26344	1.87148	0.499611	0.998389	0.000167298	8.04448e-05	0.000118582	Firmicutes	Selenomonas
aRSV209	0.779033	1.88617	0.679589	0.998389	0.000356249	0.000145717	0.00025048	Proteobacteria	unclassified
aRSV210	-0.310015	1.8416	0.866316	0.998389	0.000140385	6.54427e-05	0.000128525	Actinobacteria	unclassified
aRSV211	0.513192	1.40284	0.714497	0.998389	4.48712e-05	4.4456e-05	8.22583e-05	Firmicutes	Stomatobaculum
aRSV212	0.808122	1.24456	0.516128	0.998389	0.000324362	0.000402173	0.000669937	Bacteroidetes	Bergeyella
aRSV213	-0.139566	1.33602	0.916801	0.998389	8.12669e-05	0.000124169	0.000126537	Firmicutes	Erysipelotrichaceae_UCG-006
aRSV214	-0.642802	0.96341	0.504635	0.998389	0.000339616	0.000436677	0.000307531	Bacteroidetes	unclassified
aRSV215	1.00193	1.65654	0.545291	0.998389	0.000164698	0.000197787	0.000396909	Proteobacteria	Comamonas
aRSV216	0.716661	2.63731	0.785822	0.998389	0.000106146	2.30033e-05	3.32298e-05	Firmicutes	Selenomonas
aRSV217	-0.735491	1.35993	0.588626	0.998389	0.000179419	0.00021283	5.69279e-05	Actinobacteria	Corynebacterium
aRSV218	-0.785812	0.954075	0.410146	0.998389	0.000123029	8.65951e-05	6.83277e-05	Firmicutes	Mogibacterium
aRSV219	0.125045	3.00949	0.966857	0.998389	0.000468592	0.000319106	0.000235256	Spirochaetae	Treponema
aRSV220	0.0406165	3.98889	0.991876	0.998389	0.000104013	0.000195465	3.14189e-05	Firmicutes	Family_XIII_AD3011_group
aRSV221	2.75413	3.9864	0.489641	0.998389	0.000895646	0.00128643	8.69188e-05	Firmicutes	Enterococcus
aRSV222	-1.23444	3.00509	0.681232	0.998389	0.00028312	0.000171488	5.86003e-05	Bacteroidetes	Rikenellaceae_RC9_gut_group
aRSV223	-1.62682	1.53219	0.288344	0.998389	9.10644e-05	0.000126474	4.12578e-05	Actinobacteria	Olsenella
aRSV224	-0.480328	1.88251	0.798605	0.998389	5.47383e-05	4.04271e-05	3.94558e-05	Bacteroidetes	Prevotella
aRSV225	1.36491	1.65401	0.409251	0.998389	2.84041e-05	3.87852e-05	0.00013376	Actinobacteria	Bifidobacterium
aRSV226	-1.22778	3.98782	0.758171	0.998389	0.000405004	0.000412287	5.6979e-05	Tenericutes	Acholeplasma
aRSV227	0.0109056	1.65383	0.994739	0.998389	0.000111389	8.91012e-05	0.00100004	Fusobacteria	Leptotrichia
aRSV228	-0.296348	2.05506	0.885339	0.998389	7.96732e-05	5.06284e-05	5.86337e-05	Bacteroidetes	Prevotellaceae_UCG-004
aRSV229	-0.102307	3.99246	0.979556	0.998389	0.00010897	2.34695e-05	3.20208e-05	Tenericutes	Acholeplasma
aRSV230	-1.38998	1.14582	0.225097	0.998389	0.000101234	0.000124318	6.55405e-05	Actinobacteria	Slackia
aRSV231	1.46433	3.18387	0.645573	0.998389	0.000111302	9.27991e-05	9.01927e-05	Proteobacteria	Wolinella
aRSV232	-2.77764	3.98689	0.485995	0.998389	0.000263401	0.000120694	3.20709e-05	Spirochaetae	Treponema
aRSV233	-0.910293	1.31515	0.488839	0.998389	8.70167e-05	0.000114984	7.13977e-05	Fusobacteria	Leptotrichia
aRSV234	-1.72681	3.0017	0.565104	0.998389	0.000402041	0.000578604	0.000321258	Spirochaetae	Treponema
aRSV235	-1.27085	2.79711	0.649581	0.998389	0.000131054	9.33438e-05	3.0079e-05	Firmicutes	Lachnoanaerobaculum
aRSV236	-0.500585	1.89692	0.791862	0.998389	0.00022197	0.000242768	0.000114871	Proteobacteria	Desulfovibrio
aRSV237	2.19056	1.68526	0.193657	0.998389	5.57052e-05	3.52454e-05	0.000620336	Bacteroidetes	Capnocytophaga
aRSV238	-3.32376	3.98522	0.404268	0.998389	9.42261e-05	8.00947e-05	0	Firmicutes	Oribacterium
aRSV239	0.283239	1.37723	0.837057	0.998389	8.94448e-05	0.000132362	0.00015804	Saccharibacteria	unclassified
aRSV240	-0.10231	3.99246	0.979556	0.998389	0.000204564	7.71934e-05	0.000201209	Proteobacteria	Desulfomicrobium
aRSV241	-0.102162	3.99246	0.979585	0.998389	1.29389e-05	2.45012e-05	0	Bacteroidetes	Prevotella
aRSV242	-0.102201	3.99246	0.979578	0.998389	9.06531e-05	0	0	Firmicutes	Streptococcus
aRSV243	-1.79739	3.70113	0.627229	0.998389	0.000365514	0.000682926	9.68802e-05	Fusobacteria	Leptotrichia
aRSV244	2.51403	3.98714	0.528344	0.998389	0.000246703	0.000128065	0.000220573	Spirochaetae	Treponema
aRSV245	0	0	1	NA	0.000263176	0	0	Bacteroidetes	Prevotella
aRSV246	2.2556	3.35181	0.500978	0.998389	5.10754e-05	7.49168e-06	0.000202143	Gracilibacteria	unclassified
aRSV247	0	0	1	NA	6.62848e-05	0	1.02121e-05	Saccharibacteria	unclassified
aRSV248	0.413718	2.72146	0.879171	0.998389	2.97517e-05	1.98503e-05	0.000188	Firmicutes	Veillonella
aRSV249	1.23514	3.98842	0.756802	0.998389	7.79114e-06	1.47534e-05	4.25544e-05	Firmicutes	unclassified
aRSV250	-0.0315448	3.98932	0.993691	0.998389	0.00013409	9.42685e-05	2.09426e-05	Firmicutes	unclassified
aRSV251	-2.29727	3.38901	0.49786	0.998389	0.000197373	0.000163321	6.4184e-05	Saccharibacteria	Candidatus_Saccharimonas
aRSV252	-1.25866	1.95263	0.519187	0.998389	7.96685e-05	0.000108854	0.00016225	Gracilibacteria	unclassified
aRSV253	-1.05729	2.53834	0.677024	0.998389	0.000289376	0.000401971	0.000169724	Bacteroidetes	unclassified
aRSV254	-0.102234	3.99246	0.979571	0.998389	0.000196097	0.000329858	0.000373311	Proteobacteria	Alishewanella
aRSV255	0	0	1	NA	0.000215028	0	0	Proteobacteria	Candidatus_Hepatincola
aRSV256	0.555735	1.05684	0.598995	0.998389	3.89099e-05	5.70594e-05	0.000102791	Firmicutes	Howardella
aRSV257	-1.65297	3.9872	0.678457	0.998389	3.53656e-05	3.71198e-05	1.36161e-06	Firmicutes	Lachnoanaerobaculum
aRSV258	-0.441602	2.10278	0.833661	0.998389	6.22731e-05	9.93753e-05	3.70956e-05	Bacteroidetes	unclassified
aRSV259	1.01408	2.43163	0.67665	0.998389	2.71458e-05	8.73771e-06	3.81368e-05	Bacteroidetes	Prevotella
aRSV260	-0.579022	3.98734	0.884541	0.998389	0.0001309	2.6425e-05	9.14206e-06	Firmicutes	unclassified
aRSV261	-0.213201	1.40082	0.879032	0.998389	7.53899e-05	5.31383e-05	5.66347e-05	Bacteroidetes	Prevotella
aRSV262	-0.102125	3.99246	0.979593	0.998389	1.88606e-05	2.75936e-05	1.38936e-05	Firmicutes	Lactobacillus
aRSV263	-3.06587	3.61651	0.39658	0.998389	4.80101e-05	2.70291e-05	1.64302e-05	Bacteroidetes	Blvii28_wastewater-sludge_group
aRSV264	-0.725846	3.46365	0.83401	0.998389	2.92037e-05	3.78638e-05	2.72394e-05	Bacteroidetes	Prevotella
aRSV265	-3.10837	2.62374	0.236132	0.998389	8.01257e-05	6.45551e-05	3.87215e-05	Firmicutes	unclassified
aRSV266	-3.15744	3.98569	0.428247	0.998389	8.98738e-05	0.000149415	5.55588e-05	WS6	unclassified
aRSV267	0.103733	1.63411	0.949385	0.998389	3.98839e-05	2.86658e-05	2.97522e-05	Firmicutes	Eggerthia
aRSV268	-2.96666	3.98458	0.456552	0.998389	0.00014882	0.000202147	7.23858e-06	Spirochaetae	Treponema
aRSV269	-3.24495	3.60402	0.367923	0.998389	2.32147e-05	3.37247e-05	0	Actinobacteria	Propionibacterium
aRSV270	0	0	1	NA	1.53327e-05	1.04666e-05	0.000130078	Saccharibacteria	Candidatus_Saccharimonas
aRSV271	1.84111	3.98831	0.644349	0.998389	1.15513e-05	8.99293e-07	4.39257e-05	Bacteroidetes	Prevotella
aRSV272	-0.736666	1.25907	0.558488	0.998389	3.59338e-05	5.451e-05	3.57258e-05	Spirochaetae	Treponema
aRSV273	-0.102174	3.4607	0.976446	0.998389	1.94933e-05	3.18754e-05	0	Firmicutes	Lactobacillus
aRSV274	1.78532	3.98823	0.654407	0.998389	4.43688e-05	7.22466e-05	0.000213633	Firmicutes	Lactococcus
aRSV275	-1.27518	3.9889	0.74921	0.998389	3.54302e-05	4.16189e-05	0.000171727	Fusobacteria	Leptotrichia
aRSV276	0	0	1	NA	0.000136913	0.000248748	1.01989e-05	Bacteroidetes	Dysgonomonas
aRSV277	-0.723164	3.99202	0.856248	0.998389	0.000190761	0.000361227	0	Firmicutes	Fusibacter
aRSV278	-0.303167	3.99114	0.939451	0.998389	0.000114987	4.27007e-06	6.6965e-05	Bacteroidetes	unclassified
aRSV279	-0.213775	1.49395	0.886217	0.998389	0.000103638	9.76053e-05	5.48525e-05	Actinobacteria	Actinomyces
aRSV280	-2.11303	1.38238	0.126377	0.998389	0.000105532	9.73299e-05	2.98921e-05	Firmicutes	Oribacterium
aRSV281	0.401329	3.99195	0.91992	0.998389	0.000161776	1.31984e-05	1.96319e-06	Tenericutes	Acholeplasma
aRSV282	-0.808179	2.99683	0.787408	0.998389	3.74856e-05	4.58106e-05	2.54392e-05	Bacteroidetes	Prevotella
aRSV283	1.72562	1.87205	0.356643	0.998389	4.30486e-05	3.74671e-05	0.000127488	Proteobacteria	Propionivibrio
aRSV284	1.16124	2.19199	0.596274	0.998389	3.91681e-05	4.35164e-05	5.56388e-05	Bacteroidetes	Bacteroides
aRSV285	-2.14239	1.63213	0.189307	0.998389	6.36998e-05	5.81238e-05	2.81609e-05	Firmicutes	unclassified
aRSV286	-2.40559	3.98809	0.54638	0.998389	0.000127049	7.75421e-05	0	Bacteroidetes	unclassified
aRSV287	-3.38694	3.89062	0.384006	0.998389	3.81085e-05	4.2474e-05	0	Firmicutes	Dialister
aRSV288	-1.21051	3.99114	0.761662	0.998389	1.37846e-05	1.63558e-05	5.0353e-05	Proteobacteria	unclassified
aRSV289	0.0511987	2.37147	0.982775	0.998389	2.62798e-05	1.72113e-05	1.70488e-05	Proteobacteria	unclassified
aRSV290	1.63509	2.55182	0.521683	0.998389	1.16014e-05	9.67957e-06	3.24556e-05	Firmicutes	unclassified
aRSV291	-1.8589	3.18873	0.559922	0.998389	0.000120207	8.42162e-05	8.49097e-05	Spirochaetae	Treponema
aRSV292	-1.84706	3.98759	0.643219	0.998389	6.58767e-05	5.29594e-05	9.19177e-05	Saccharibacteria	Candidatus_Saccharimonas
aRSV293	0	0	1	NA	2.02178e-05	0	1.90625e-05	Bacteroidetes	Prevotella
aRSV294	-1.8761	2.50104	0.453178	0.998389	1.60129e-05	3.03223e-05	1.64741e-05	Actinobacteria	Cryptobacterium
aRSV295	0.812713	1.89229	0.667569	0.998389	2.75783e-05	3.70166e-05	4.4061e-05	unclassified	unclassified
aRSV296	0.685797	3.99075	0.863558	0.998389	9.50224e-05	5.81841e-05	3.27134e-06	Bacteroidetes	Bacteroides
aRSV297	0	0	1	NA	4.31148e-05	1.70146e-05	0	Bacteroidetes	Prevotella
aRSV298	-0.102318	3.97714	0.979475	0.998389	0.0001544	0	0	Firmicutes	Pelospora
aRSV299	2.35819	3.57583	0.509587	0.998389	6.74719e-07	0	2.4712e-05	Proteobacteria	Acinetobacter
aRSV300	-2.79379	3.98684	0.483458	0.998389	0.000150277	0.000264999	0	Firmicutes	Clostridium_sensu_stricto
aRSV301	-0.11531	3.99018	0.976946	0.998389	6.16669e-06	4.16916e-06	4.66837e-06	Bacteroidetes	Prevotella
aRSV302	-1.49287	3.99056	0.70833	0.998389	6.0495e-05	6.65075e-05	8.66697e-06	Bacteroidetes	Rikenellaceae_RC9_gut_group
aRSV303	-2.10573	3.98814	0.597501	0.998389	3.12997e-05	2.28405e-05	2.76157e-05	Firmicutes	Ezakiella
aRSV304	-0.339758	3.99191	0.932173	0.998389	2.6787e-05	1.86879e-06	6.80804e-07	Firmicutes	Lachnospiraceae_NK3A20_group
aRSV305	-1.30317	3.98827	0.743856	0.998389	6.15017e-05	0.000106897	1.92432e-06	Fusobacteria	unclassified
aRSV306	0	0	1	NA	0.000104883	0.000120145	6.15279e-05	Firmicutes	Roseburia
aRSV307	0.142457	3.99197	0.971533	0.998389	1.34347e-05	5.89826e-07	4.29093e-06	Proteobacteria	Enhydrobacter
aRSV308	-1.93633	3.98947	0.627421	0.998389	7.1022e-05	0.0001121	5.48026e-06	Proteobacteria	Bilophila
aRSV309	-1.36783	3.99083	0.731791	0.998389	5.24428e-05	8.15195e-06	0	Firmicutes	Selenomonas
aRSV310	-2.32342	3.98835	0.560194	0.998389	6.67382e-05	0.000115863	7.11997e-06	Bacteroidetes	Bacteroides
aRSV311	-0.102218	3.99246	0.979574	0.998389	2.12819e-06	0	5.32584e-06	Bacteroidetes	Prevotella
aRSV312	0.531982	3.99178	0.89398	0.998389	2.57786e-05	0	2.27044e-06	Firmicutes	Lactobacillus
aRSV313	-0.102243	3.99246	0.979569	0.998389	2.60908e-05	8.54014e-06	9.16154e-06	Proteobacteria	Kingella
aRSV314	-0.229691	1.84129	0.900725	0.998389	4.7339e-05	4.59344e-05	3.89173e-05	Bacteroidetes	Flavobacterium
aRSV315	-0.506652	3.20977	0.874578	0.998389	2.28053e-05	3.07521e-05	6.4843e-06	Bacteroidetes	Rikenellaceae_RC9_gut_group
aRSV316	-0.344262	3.98896	0.931225	0.998389	4.57217e-05	7.84869e-05	3.27134e-06	Firmicutes	Lachnoclostridium
aRSV317	2.1188	3.66009	0.562661	0.998389	1.08173e-05	1.38519e-06	0.000166095	Gracilibacteria	unclassified
aRSV318	-0.592574	3.98705	0.88185	0.998389	2.73152e-05	2.62209e-05	3.43978e-05	Spirochaetae	Treponema
aRSV319	0.112932	3.99177	0.97743	0.998389	5.12678e-07	9.70816e-07	1.67384e-06	Firmicutes	Dialister
aRSV320	0	0	1	NA	3.17125e-06	6.00514e-06	1.32854e-05	Proteobacteria	Cardiobacterium
aRSV321	0.771176	3.1361	0.805757	0.998389	3.59657e-05	1.57287e-06	6.83342e-06	Firmicutes	unclassified
aRSV322	0.650763	3.8813	0.866846	0.998389	2.062e-05	3.82157e-05	2.3785e-06	Firmicutes	Staphylococcus
aRSV323	0.762286	3.99147	0.848542	0.998389	8.15674e-06	1.54457e-05	1.14163e-05	Proteobacteria	Cardiobacterium
aRSV324	-0.0823083	3.99084	0.983545	0.998389	5.45425e-06	3.47457e-06	1.76868e-05	Actinobacteria	Actinomyces
aRSV325	-0.723156	3.99202	0.85625	0.998389	7.64031e-05	0.000144678	0	Bacteroidetes	Dysgonomonas
aRSV326	-0.102232	3.99246	0.979571	0.998389	4.88368e-05	1.64155e-05	0	Firmicutes	Anaerovorax
aRSV327	0	0	1	NA	1.99253e-05	2.057e-05	1.94659e-05	Elusimicrobia	unclassified
aRSV328	-0.586848	3.98948	0.883054	0.998389	8.28844e-05	8.15754e-05	1.55591e-05	Firmicutes	Candidatus_Soleaferrea
aRSV329	0.896208	3.99131	0.822337	0.998389	3.73088e-05	7.06486e-05	2.50161e-06	Proteobacteria	Klebsiella
aRSV330	0.0201456	3.99043	0.995972	0.998389	4.30021e-05	8.14294e-05	5.23517e-06	Firmicutes	Intestinimonas
aRSV331	-0.976953	3.9916	0.806648	0.998389	2.85193e-05	4.63585e-05	0	Bacteroidetes	Paludibacter
aRSV332	-0.102205	3.99246	0.979577	0.998389	6.57013e-06	1.13586e-05	1.57089e-05	Firmicutes	Peptoniphilus
aRSV333	-0.102207	3.99246	0.979576	0.998389	1.28573e-05	0	0	Bacteroidetes	unclassified
aRSV334	-0.102151	3.99246	0.979588	0.998389	3.2788e-06	0	1.60348e-05	Actinobacteria	Actinomyces
aRSV335	0.750347	3.99149	0.850887	0.998389	8.10598e-06	7.47516e-06	3.95157e-06	Actinobacteria	Lawsonella
aRSV336	-1.08039	3.99141	0.786637	0.998389	2.53846e-06	4.80687e-06	0	Actinobacteria	Propionibacterium
aRSV337	0.258954	3.9921	0.94828	0.998389	6.05685e-06	0	9.62159e-07	Firmicutes	unclassified
aRSV338	1.20998	3.99069	0.761736	0.998389	1.13701e-05	2.15307e-05	3.84863e-06	Bacteroidetes	Dysgonomonas
aRSV339	0.875788	3.66623	0.811199	0.998389	3.15788e-05	5.97982e-05	1.20332e-05	Bacteroidetes	Cloacibacterium
aRSV340	-0.102215	3.99246	0.979575	0.998389	9.28098e-06	5.40462e-06	0	Saccharibacteria	unclassified
aRSV341	-0.102161	3.99246	0.979585	0.998389	0	0	0	Proteobacteria	Diaphorobacter
aRSV342	0.624861	3.99165	0.875606	0.998389	0	0	4.33348e-06	Bacteroidetes	unclassified
aRSV343	-0.627278	3.99024	0.875085	0.998389	6.54868e-06	8.11257e-06	3.6297e-06	Proteobacteria	Phaselicystis
aRSV344	0.300754	3.99102	0.93993	0.998389	1.09654e-06	2.07643e-06	3.57306e-06	Actinobacteria	Aestuariimicrobium
aRSV345	0.409602	3.99151	0.918266	0.998389	8.19993e-07	1.55275e-06	3.49011e-06	Bacteroidetes	Capnocytophaga
aRSV346	-1.38123	3.99081	0.729266	0.998389	2.96172e-06	5.60837e-06	3.87908e-06	Firmicutes	Catabacter
aRSV347	0.237884	3.99213	0.952483	0.998389	1.17798e-06	0	6.64657e-06	Tenericutes	unclassified
aRSV348	-0.136631	3.99141	0.972693	0.998389	2.08685e-05	3.9517e-05	2.39945e-06	Bacteroidetes	Bergeyella
aRSV349	-0.590894	3.9903	0.882278	0.998389	1.19312e-05	1.74433e-05	1.73189e-06	Firmicutes	unclassified
aRSV350	0.230813	3.99161	0.953888	0.998389	5.32092e-06	6.65559e-06	3.7918e-06	Firmicutes	Erysipelotrichaceae_UCG-004
aRSV351	-0.102261	3.99246	0.979566	0.998389	1.37249e-05	0	0	Bacteroidetes	Bacteroides
aRSV352	0.271618	3.97949	0.945583	0.998389	4.54805e-06	8.61226e-06	9.04353e-06	Proteobacteria	Brevundimonas
aRSV353	0.568173	2.55367	0.82393	0.998389	1.56979e-05	2.02616e-05	6.83277e-06	Bacteroidetes	Prevotella
aRSV354	0.334762	3.99202	0.93317	0.998389	0	0	4.28561e-06	Proteobacteria	Pseudomonas
aRSV355	0.2716	3.99105	0.945744	0.998389	1.31944e-06	2.32196e-06	8.58187e-06	Actinobacteria	Actinomyces
aRSV356	-0.648685	3.9921	0.870918	0.998389	8.7605e-06	8.20404e-06	0	Bacteroidetes	Elizabethkingia
aRSV357	-0.102219	3.99246	0.979574	0.998389	2.22251e-06	0	0	Bacteroidetes	Prevotella
aRSV358	-0.473094	3.99229	0.90567	0.998389	1.70246e-06	2.21631e-06	0	Bacteroidetes	Prevotella
aRSV359	0.107671	3.99229	0.978484	0.998389	0	0	9.06107e-07	Cyanobacteria	unclassified
aRSV360	-0.500997	3.99226	0.900134	0.998389	1.81438e-06	1.38972e-06	0	Bacteroidetes	Prevotella
